# Supplementary material for: Secretome analysis of patient-derived GBM tumor spheres identifies midkine as a potent therapeutic target
Source: Springer Nature journal article supplement (doi:10.1038/s12276-019-0351-y), 2019-12-01
Supplement: MOESM1 [file 12276_2019_351_MOESM1_ESM-1.pdf]

Patient GBM tumor-sphere originated secretome analysis identifies Midkine, as a potent therapeutic target.

Suji Han, Hye-Mi Shin and Jin-Ku Lee *et al.*,

## **Supplementary Information**

### **Materials and Methods**

#### **Patient-derived GBM specimens and primary tumor-sphere culture**

All surgical specimens were acquired from the GBM patients at the Samsung Medical Center (Seoul, Korea) in consensus with the valid Institutional Review Boards. Tumor specimens were dissociated into single cells using Liberase TM (Sigma-Aldrich), followed by percoll (Sigma) purification. Tumor cell isolates and human neural stem cells (hNPC, 101Bio) were cultured in neurobasal A media (Thermofisher) with N2 and B27 supplement (0.5X each, Thermofisher), human recombinant basic fibroblast growth factor (bFGF), epidermal growth factor (EGF) (20ng/ml each, Peprotech), Penicillin-Streptomycin and 2mM L-glutamine (Thermofisher).<sup>1</sup>

#### **Secretome analysis**

Proteolytic digestion of proteins, fraction of peptides and mass spectrometric analysis were similar to the method described previously.<sup>2</sup> The peptide samples were separated using a reversed phase Magic C18 column (75  $\mu$ m) on an Agilent 1200 HPLC system with a linear gradient of 10-40% in acetonitrile containing 0.1% formic acid for 90 min (400 nL/min). The HPLC system was coupled to an LTQ-XL mass spectrometer (Thermofisher). The ESI source was operated in the positive ion mode (300-2000 m/z) with spray voltage set at 1.9 kV, capillary voltage at 30 V and the heated capillary temperature was set at 250 °C. Each scan cycle consisted of one full MS scan in profile mode followed by six data dependent

MS/MS scans with the following options: isolation width, 1.5 m/z; normalized collision energy, 25%; dynamic exclusion duration, 180s.

The acquired MS/MS spectra were compared against various databases using SEQUEST in Proteome Discoverer 1.4 (ThermoFisher) against the human UniProtKB database (released in April 2014) supplemented with experimentally validated B27 and N2 contaminant sequences. The B27 and N2 contaminant sequences were mammal UniProt sequences identified earlier by LC-MS/MS analysis of B27 and N2 supplements in growth medium.<sup>3</sup> Two trypsin missed cleavages, fixed modification of carbamidomethylation at cysteine (+ 57.02 Da) and variable modification of oxidation at methionine (+ 15.99 Da) were allowed. Mass tolerances for MS/MS and MS were set to  $\pm 0.5$  and  $\pm 2$  Da, respectively. Peptide and protein assignment and validation (FDR >1%) were performed.

The biological functions of identified proteins were analyzed using DAVID functional classification tool (<https://david.ncifcrf.gov/>). The Functional networks based on the biological processes were analyzed using the ClueGO Cytoscape plugin.<sup>4</sup>

### **Immunohistochemistry and immunofluorescence analysis**

Immunohistochemical analysis were performed using formalin-fixed, paraffin embedded (FFPE) tissues from GBM patient or tumor bearing xenograft. Sections were incubated with primary antibodies included anti-Midkine (Abcam), anti-pAkt, anti-pERK (Cell Signaling Technology, CST), followed by biotinylated secondary antibodies (Vector Laboratories) and treated SignalStain Boost IHC Detection Reagent (CST). Sections were then stained with 3,3-diaminobenzidine substrate (Vector Laboratories) and counterstained with H&E solution. For immunofluorescence analysis, tissues or cells were fixed with 4% paraformaldehyde for 20 min. Tissues were further incubated in 30% sucrose overnight and then embedded in optimal cutting temperature (OCT) compound and crysectioning at 10  $\mu$ m. After blocking and permeabilization with 0.5% triton X-100 and 5% normal goat or donkey serum in PBS, sections were stained with target antibodies in PBS with 0.1% bovine serum albumin (BSA),

followed by incubation with fluorescein-conjugated secondary antibodies were used for visualization. 4', 6'-diamidino-2'-phenylindole (DAPI) staining was used to control as an intracellular localization. Images were obtained using LSM700 Confocal Laser Scanning Microscope system (Zeiss) or Operetta High Content Imaging System (PerkinElmer).

### **Cell proliferation assay**

For evaluating short-term proliferation, 500 single cells were plated per well in a 384-well plate. Next, cells were treated with an anti-MDK antibody (Santa Cruz Biotechnology) or recombinant MDK (Sigma-Aldrich) and further incubated at 37°C for 4 days. Cell viability was analyzed using an adenosine triphosphate (ATP) monitoring system based on firefly luciferase (ATPLite™ 1step, PerkinElmer), and luminescence was measured using an EnVision Multilabel plate reader (PerkinElmer).<sup>5</sup> Relative cell viability was obtained by normalization to luminescence values of vehicle or control IgG treated cells.

Anti-EdU fluorescence assay was carried out according to the manufacturer's recommendation (BCK-EdU594, Sigma-Aldrich). At first, EdU solution (50 µM) was added to each well, and cells were incubated at 37°C for 24 h. Culture medium was removed, and cells were fixed with 4% formaldehyde in PBS. Cells were washed 5 times with 3% BSA in PBS solution and permeabilized with 0.5% triton X-100 in PBS, followed by adding reaction cocktail. The nuclei were counter-stained with Hoechst 33342 solution. Fluorescence images were captured with Operetta High-Content Imaging System (PerkinElmer).

### **Sphere formation analysis and Limiting dilution assay (LDA)**

For sphere formation assay, single cells isolated from primary tumor spheres were seeded (100 cells per well) in a 96-well plate. After 10-14 days, the tumor spheres were captured using Operetta High Content Imaging System (PerkinElmer), and the number of spheres, roundness, sphere area were analyzed using Harmony High Content Imaging and Analysis

Software (PerkinElmer). Cell aggregates of size with 25-75 percentile were selected and those of roundness less than 0.9 were excluded at the analyses. LDA was also fulfilled in 96 well plates and cells were seeded at a range of 1–200 cells per well (12 wells per group). After 10-14 days, wells without spheres were measured and analyzed. Statistical significance was analyzed using ELDA software (Walter+Eliza Hall Bioinformatics).<sup>6</sup>

### **Lentivirus production and transduction**

MDK knockdown shRNA lentiviral clones (TRCN0000331210 and TRCN0000331252 for shMDK-1 and shMDK-2, respectively) and shRNA lentiviral clones for PCBP4 knockdown (TRCN0000232287 and TRCN0000232288) were purchased from Sigma-Aldrich, and a pLenti-PCBP4 expression vector was obtained from Abm. Lentiviruses were produced in 293FT cells with packaging mix (ViraPower Lentiviral Expression Systems, Thermofisher) and concentrated by ultracentrifugation. Viral titers were determined by the serial dilution method. Lentiviral particles were transduced into cells, and stable transfectants were selected by incubation with puromycin (1~2 ng/ml).

### **Western blot assay**

GBM tumor-spheres were washed in cold PBS, followed by being harvested in passive lysis buffer (Promega) and a protease and phosphatase inhibitor cocktail added (Roche). Insoluble materials were removed by centrifugation at 13000 rpm for 5 min, 4°C. The proteins were separated by SDS-PAGE and transferred to PVDF membranes using iBlot 2 Bry Blotting System (Thermofisher). Immunoblotting was performed using antibodies against MDK, pP53 (Abcam), AKT, pAKT (Ser473), ERK, pERK (Thr202/Thy204), STAT3, pSTAT3 (Thr705), MEK, pMEK (Ser217/221), S6K, pS6K (Thr389), Chk1, pChk1 (Ser345), Chk2, pChk2 (Thr68), GAPDH, Cyclin D1, Cbl, pCbl, pγH2AX (Ser139) (all from CST), pGrb2 (Ser159) (Thermofisher), NOXO1 (Lifespan Bioscience), PCBP4 (Sigma-aldrich), beta-actin, Grb2, Cyclin A and Cyclin C (all from Santacruz Biotechnology).

### **Orthotopic GBM xenograft models**

All animal experiments were approved by the Institutional Review Board of the SMC and performed according to the guidelines of the Animal Use and Care Committees. GBM cells were dissociated,  $1 \times 10^4$  cells per each mouse were resuspended in 5  $\mu$ l of Hank's balanced salt solution (HBSS, Thermo Scientific), followed by stereotactically (2 mm left and 1 mm anterior of the bregma, 2 mm deep from the dura) injected into the brains of Balb/c nude mice (6~8-week-old female, Orient Bio Inc.). Kaplan meier survival (GraphPad Prism v5.03) and immunohistochemical analysis were performed under blinded inspection.

### **RNA sequencing**

RNA sequencing libraries were prepared using the Illumina TruSeq RNA Library Preparation Kit v2. The sequenced reads were trimmed and mapped onto hg19 using GSNAP version 2012-12-20.<sup>7</sup> The resulting aligned reads were summarized into BED files using SAMtools and bedTools (bamToBed version 2.16.2).<sup>8</sup> The BED files were used to estimate reads per kilobase of transcript per million reads (RPKM) using the R package DEGseq.<sup>9</sup> Genes with low expression level across the cohort are removed. The criteria for removing genes were 1)  $(\max(\log_2(\text{rpkm} + 1)) - \min(\log_2(\text{rpkm} + 1))) \geq 1$ ; 2)  $\max(\log_2(\text{rpkm} + 1)) \geq 1$

### **Bioinformatical analysis**

Gene Set Enrichment Analysis (GSEA) was conducted by using the Java with the Molecular Signatures Database (MSigDB; version 5.1) C2 gene set collection.<sup>10</sup> P values about enrichment of genes were estimated by 20,000 gene set permutations. Single sample gene set enrichment analysis (ssGSEA) was used to produce gene set activation scores of each sample using Genepattern (<http://software.broadinstitute.org/cancer/software/genepattern>). Method for normalizing gene expression data is rank.<sup>11</sup>

For identifying differentially expressed genes from gene expression values, two groups that

were consisted by control and neutralized samples were compared with using package DEGseq of R. P values were estimated by Student's t test for paired samples and accomplish multiple correction tests using the Benjamini-Hochberg method.<sup>12</sup>

A radar plot representing pathway enrichment analysis (GO BP on DAVID) of differentially expressed protein (DEP) data was generated using R package 'radarchart'.

For modelling genetic association of anti-MDK antibody sensitivity, we trained the standard elastic net regression (R package: glmnet\_2.0-5), combining drug sensitivities and pre-selected mRNA expression as the input features.<sup>13</sup> Given an anti-MDK antibody and  $N$  GBM tumor-spheres, we used  $y = (y_1, y_2, \dots, y_n)$  represents drug sensitivity of  $n$  cells, and  $x_i = (x_{i1}, \dots, x_{ip})$ , ( $i = 1, \dots, p$ ) indicates  $p$  features of  $i$ th cell, the elastic net regression is to solve the following optimization problem:

$$\min_{\beta_0, \beta} \left[ \frac{1}{2N} \sum_{i=1}^n \left( y_i - \beta_0 - \sum_{j=1}^p (x_{ij} \beta_j) \right)^2 + \lambda \left( (1 - \alpha) \frac{1}{2} \|\beta\|_2^2 + \alpha \|\beta\|_1 \right) \right]$$

$\alpha$  controls the relative balance of the L1 and L2 penalty terms, while  $\lambda$  controls the overall penalty level of the regularized term. Similar with  $\gamma$ ,  $\alpha$  was optimized by 10-fold cross validations, but using all features.  $\alpha$  was screened using 50 values with  $\alpha \in [0,1]$  equally spaced. For each model fitting, we used the function *cv.glmnet*, with its optimized  $\lambda$  value provided from the function.

After parameter optimization, we adopt bootstrapping strategy for 100 times to obtain a robust evaluation of the predictive power of features. During each bootstrapping, we randomly select 80% of GBM tumor-spheres with 80% of the features to fit the elastic net with above optimized  $\alpha$ . For each feature, the time of appearances (non-zero fitting coefficient) out of the 100 bootstrappings, together with the average of its non-zero weights were used as its final assessment of predictive ability.

## **Survival Analysis of GBM patient**

We assessed the association between MDK expression and overall survival of IDH1 wild type 129 samples with data from cBioPortal (<http://www.cbioportal.org>). Kaplan-meier survival analysis is performed using R software version 3.4.2 (<http://www.R-project.org>) and statistically tested using Log-rank test. Cut-off values for optimal prediction of survival were obtained with the R software package 'maxstat' (REF : Hothorn T, Lausen B (2002) Maximally Selected Rank Statistics in R. R News 2/1: 3–5)

### **Protein profiling**

Protein array data were obtained using Phospho Explorer Antibody Array (# PEX100, Full Moon Biosystems). The antibody array experiment was performed by Full Moon Biosystems, according to their established protocols.<sup>14</sup> In brief, the slides were scanned on an Axon GenePix array scanner, and the images were analysed with GenePix Pro 6.0 (Molecular Devices). The fluorescence signal of each antibody was obtained.

### **Dichlorodihydrofluorescein diacetate (DCF-DA) assay**

DCFDA cellular ROS detection assay kit (Abcam) was used to measure the redox status of a cell as manufacturer's instructions.<sup>15</sup> In brief, cells were stained with DCFDA for 30 min, followed by washing in a phenol red free washing buffer. After incubation with desired agents, the fluorescence (Ex/Em=485/535 nm) was measured using EnVision Multilabel plate reader (PerkinElmer). The fluorescence images were captured and analyzed using Operetta High Content Imaging System (PerkinElmer).

### **DNA damage analysis**

P- $\gamma$ H2AX, a DNA double strand break (DSB) marker, was detected using OxiSelect DNA DSB staining kit (# STA-321, Cell Biolabs) as manufacturer's instructions. The alkaline single cell gel electrophoresis to detect DNA damages were performed by OxiSelect Comet Assay Kit (# STA-355, Cell Biolabs).<sup>16</sup> The fluorescence images were obtained using LSM700

Confocal Laser Scanning Microscope system (Zeiss).

### **Cell cycle analysis**

For analyzing cell cycle, single cell dissociates from GBM tumor-spheres were fixed with 100% ethanol and incubated at 4°C overnight. Cells were stained with propidium iodide (PI, (Sigma-Aldrich) and analyzed using Flow Cytometry (FACS Aria, BD Biosciences). The flow cytometry data were interpreted with Flow Jo software (ver. 7.6, Treestar Inc).

### **Apoptosis assay**

For Annexin V staining, single cells were washed, followed by resuspended in a Annexin V Binding Buffer (BD Pharmingen). Cells were then stained with Annexin V-APC solution (eBioscience). After adding PI (Sigma-Aldrich), Annexin V-PI positive cells were measured using FACS Aria (BD Bioscience) and data were interpreted with Flow Jo software (ver. 7.6, Treestar Inc). Caspase 3/7 activities were measured using ApoTox-Glo Triplex assay (#G6320, Promega) or CellEvent™ Caspase-3/7 Green Detection Reagent (ThermoFisher) as manufacturer's instructions. The luminescence or fluorescence intensities were obtained using EnVision Multilabel plate reader (PerkinElmer). The apoptosis array analysis was performed using the Proteome Profiler Human Apoptosis Array kit (ARY009, R & D Biosystems) according to the manufacturer's instruction and array image were analyzed using the Image J software (<https://imagej.nih.gov/ij/index.html>).

### **Statistical analysis**

Data were presented as means ± standard deviations (SDs). P values were obtained using two-tailed unpaired t-test (GraphPad Prism v.5.03). Statistical significance was displayed where \* $p < 0.05$ , \*\* $p < 0.01$ , and \*\*\* $p < 0.001$ .

### **References**

- 1 Lee, J. *et al.* Tumor stem cells derived from glioblastomas cultured in bFGF and EGF more closely mirror the phenotype and genotype of primary tumors than do serum-cultured cell lines. *Cancer Cell* **9**, 391-403, doi:10.1016/j.ccr.2006.03.030 (2006).
- 2 Shaheen, K. Y., Abdel-Mageed, A. I., Safwat, E. & AlBreedy, A. M. The value of serum midkine level in diagnosis of hepatocellular carcinoma. *Int J Hepatol* **2015**, 146389, doi:10.1155/2015/146389 (2015).
- 3 Shin, J. *et al.* Use of composite protein database including search result sequences for mass spectrometric analysis of cell secretome. *PLoS One* **10**, e0121692, doi:10.1371/journal.pone.0121692 (2015).
- 4 Bindea, G. *et al.* ClueGO: a Cytoscape plug-in to decipher functionally grouped gene ontology and pathway annotation networks. *Bioinformatics* **25**, 1091-1093, doi:10.1093/bioinformatics/btp101 (2009).
- 5 Lee, J. K. *et al.* Spatiotemporal genomic architecture informs precision oncology in glioblastoma. *Nature genetics* **49**, 594-599, doi:10.1038/ng.3806 (2017).
- 6 Hu, Y. & Smyth, G. K. ELDA: extreme limiting dilution analysis for comparing depleted and enriched populations in stem cell and other assays. *J Immunol Methods* **347**, 70-78, doi:10.1016/j.jim.2009.06.008 (2009).
- 7 Wu, T. D. & Nacu, S. Fast and SNP-tolerant detection of complex variants and splicing in short reads. *Bioinformatics* **26**, 873-881, doi:10.1093/bioinformatics/btq057 (2010).
- 8 Quinlan, A. R. & Hall, I. M. BEDTools: a flexible suite of utilities for comparing genomic features. *Bioinformatics* **26**, 841-842, doi:10.1093/bioinformatics/btq033 (2010).
- 9 Wang, L., Feng, Z., Wang, X., Wang, X. & Zhang, X. DEGseq: an R package for identifying differentially expressed genes from RNA-seq data. *Bioinformatics* **26**, 136-138, doi:10.1093/bioinformatics/btp612 (2010).
- 10 Subramanian, A. *et al.* Gene set enrichment analysis: a knowledge-based approach for interpreting genome-wide expression profiles. *Proc Natl Acad Sci U S A* **102**, 15545-15550, doi:10.1073/pnas.0506580102 (2005).
- 11 Verhaak, R. G. *et al.* Prognostically relevant gene signatures of high-grade serous ovarian carcinoma. *J Clin Invest* **123**, 517-525, doi:10.1172/JCI65833 (2013).
- 12 Benjamini, Y., Drai, D., Elmer, G., Kafkafi, N. & Golani, I. Controlling the false discovery rate in behavior genetics research. *Behav Brain Res* **125**, 279-284 (2001).
- 13 Wang, J., Kribelbauer, J. & Rabadan, R. Network propagation reveals novel genetic features predicting drug response of cancer cell lines. *Current Bioinformatics* **11**, 8, doi:10.2174/1574893611666160125222144. (2016).
- 14 Bosma, M. *et al.* FNDC4 acts as an anti-inflammatory factor on macrophages and improves colitis in mice. *Nat Commun* **7**, 11314, doi:10.1038/ncomms11314 (2016).
- 15 Eruslanov, E. & Kusmartsev, S. Identification of ROS using oxidized DCFDA and flow-cytometry. *Methods Mol Biol* **594**, 57-72, doi:10.1007/978-1-60761-411-1\_4 (2010).
- 16 Tyagi, A. *et al.* Resveratrol selectively induces DNA Damage, independent of Smad4

expression, in its efficacy against human head and neck squamous cell carcinoma. *Clin Cancer Res* **17**, 5402-5411, doi:10.1158/1078-0432.CCR-11-1072 (2011).

## Supplementary Figures and Tables

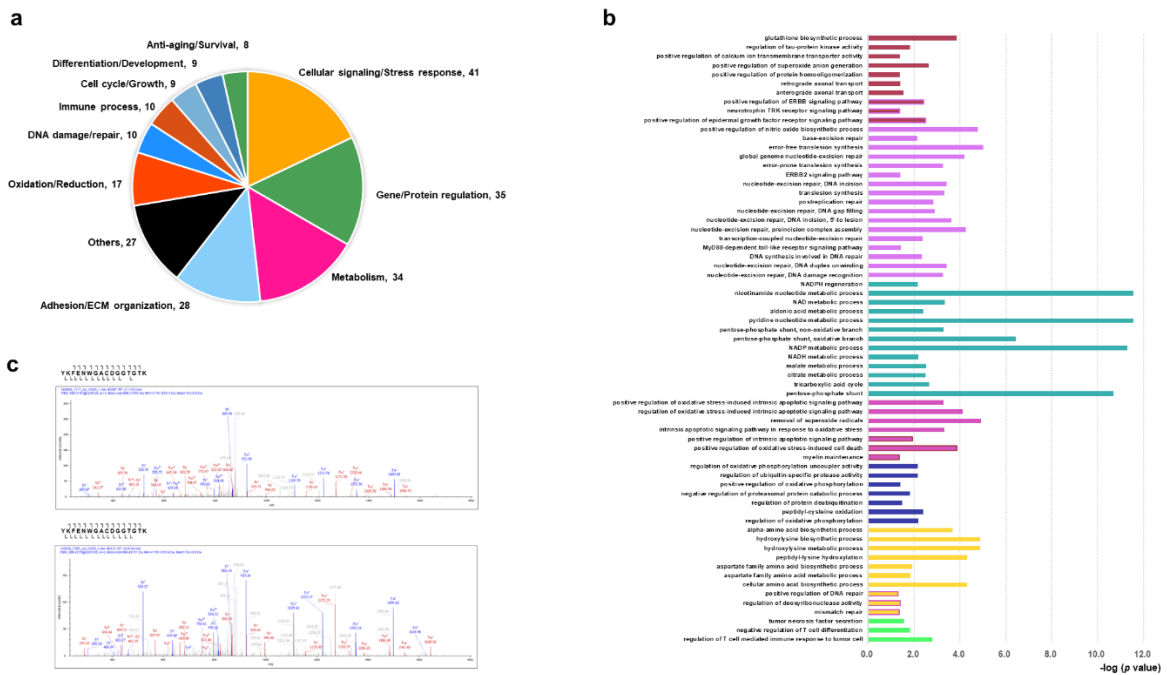

**Supplementary Figure 1. (a)** A pie chart demonstrated the number of enriched pathways for indicated functional categories, based on Gene Ontology (GO) using DAVID functional classification tool in identified total proteins. **(b)** A bar chart represented enriched key pathways shown on Figure 1c. **(c)** MS/MS peaks of peptides for MDK protein analyzed conditioned media from NCI131 (up) and N783 (bottom) cells.

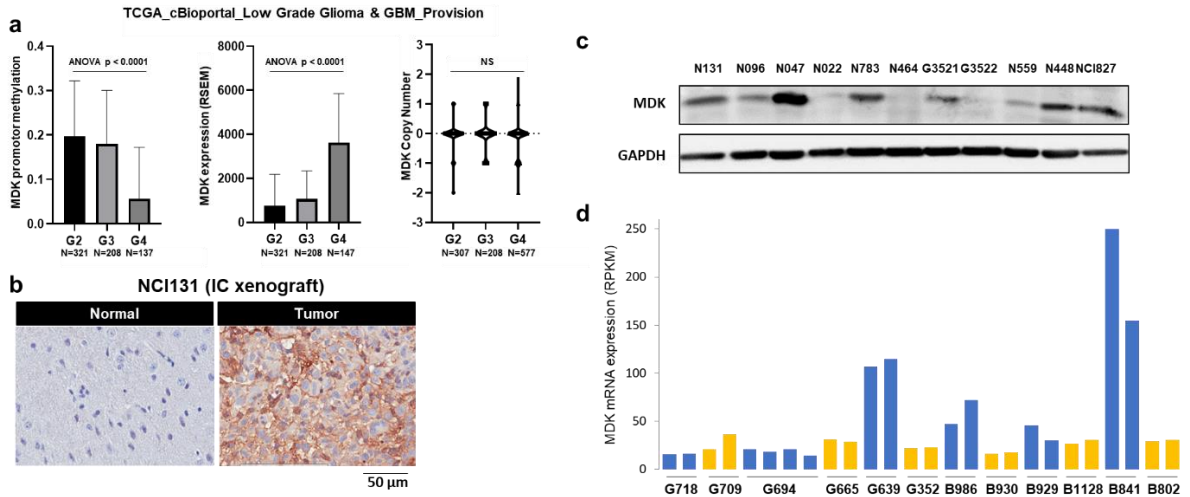

**Supplementary Figure 2.** (a) The methylation, mRNA expression and copy number status in gliomas (TCGA low grade glioma and glioblastoma\_provision dataset). (b) Immunohistochemical analyses for MDK expression in paraffin embedded xenograft tissue from NCI131 tumorsphere. Bar represents 50  $\mu$ m. (c) Western blot analysis of MDK expressions in 11 different patient-derived GBM tumorspheres. Data were representatives of three independent experiments. (d) MDK mRNA expression levels of multisector GBM samples.

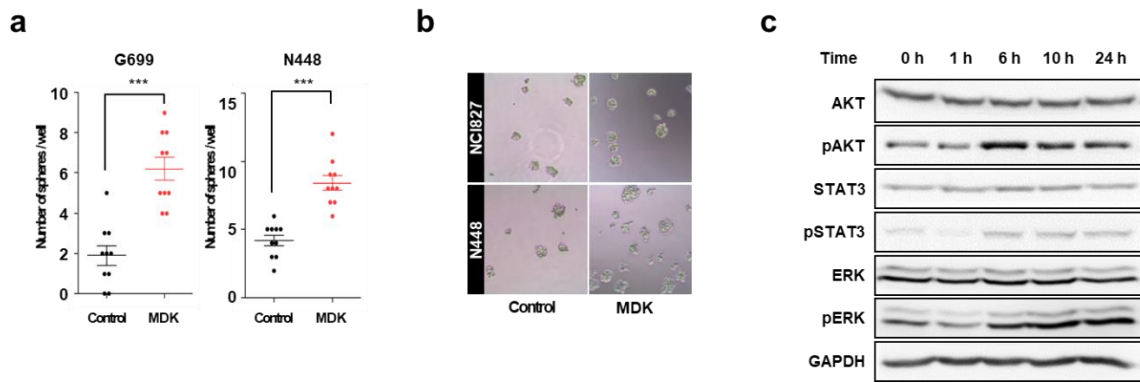

**Supplementary Figure 3. (a)** GBM tumor-spheres were dissociated into single cells and 100 cells/well were seeded in an 96 well plate. The number of spheres per well on the treatment of vehicle (black) or recombinant MDK (10 ng/ml, 10 days) in G699 (left) and N448 (right) cells were demonstrated as vertical scattered plots (n=10 per group). **(b)** Representative sphere images shown in (a) were presented. **(c)** Immunoblots for indicated proteins on the treatment of recombinant MDK (10 ng/ml) for indicated time points were demonstrated. Data were representatives of three independent experiments. GAPDH was used as a loading control.

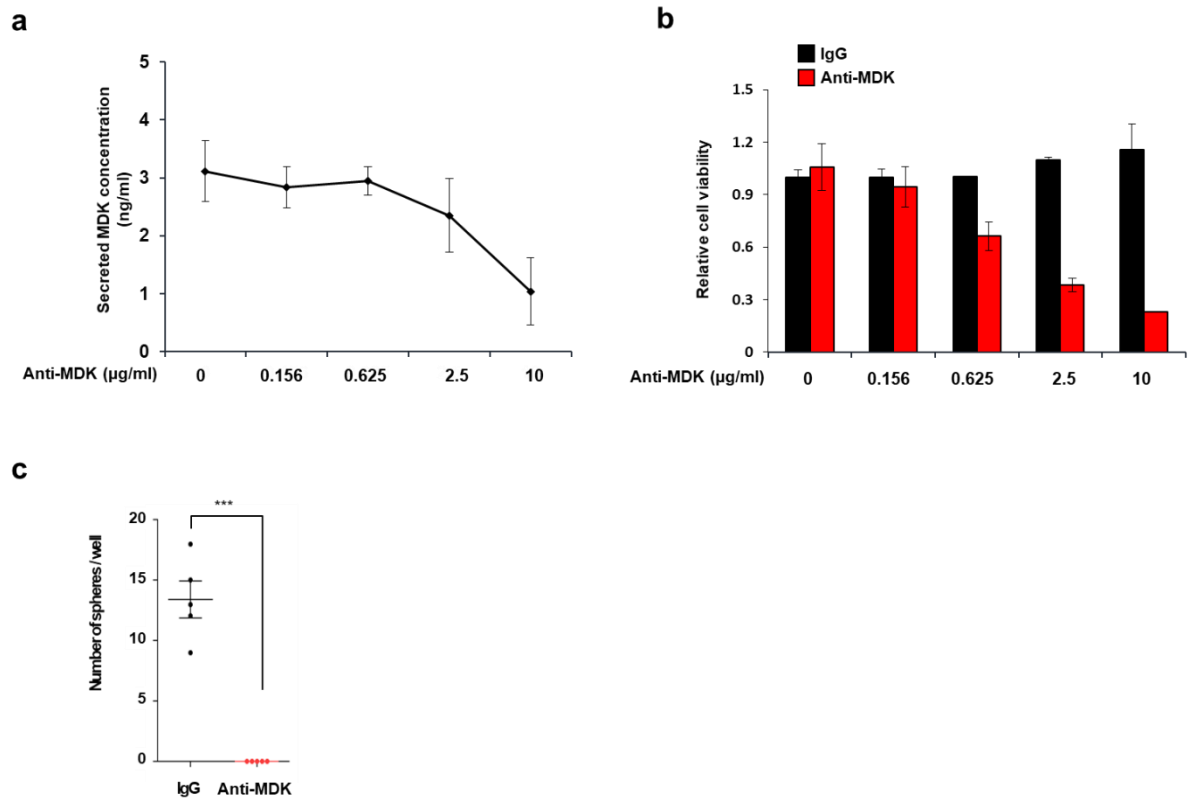

**Supplementary Figure 4. (a)** The protein concentrations of MDK (ng/ml) in a conditioned medium from NCI827 cell incubated with an anti-MDK antibody at indicated doses for 2 h were measured using ELISA and demonstrated as a line graph. **(b)** The relative cell viability of control IgG (black bars) and an anti-MDK antibody (red bars) treated NCI827 cells at indicated doses for 4 days were measured using EZ-cytox cell viability assay kit and demonstrated as a bar graph. **(c)** Single cells from NCI827 tumor-spheres were plated on a 96 well plate (100 cells/well). Number of spheres per well (n=5 per group) on the treatment of control IgG and an anti-MDK antibody (10 μg/ml for 10 days) were demonstrated as a vertical scattered plot.

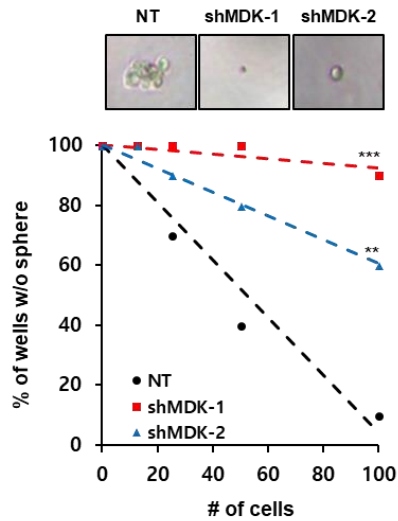

**Supplementary Figure 5.** Limiting dilution assay (LDA) in NCI131 cells transfected with NT (black) or two different shMDK constructs (red and blue), and representative sphere images were demonstrated. Statistical significance was obtained using ELDA (<http://bioinf.wehi.edu.au/software/elda/>; see also Supplementary Table 2).

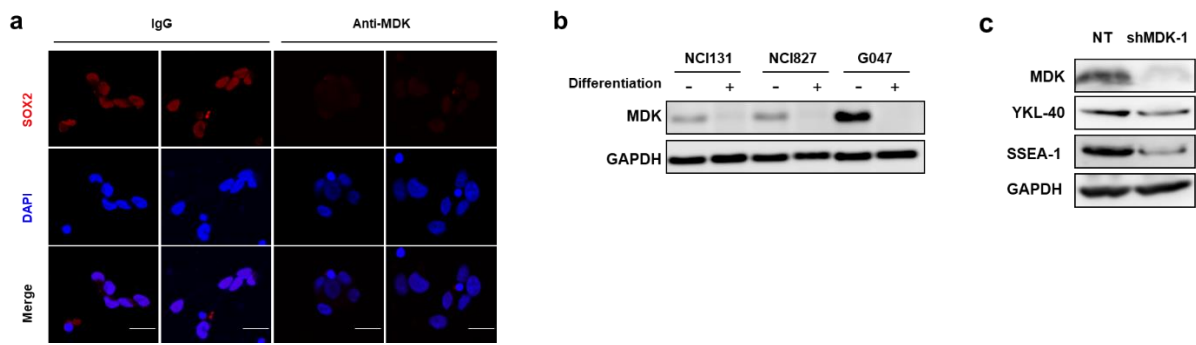

**Supplementary Figure 6. (a)** Immunofluorescence analysis for MDK (green), SOX2 (red) and/or DAPI (blue) on fresh frozen specimens from GBM tumor (G047) and the matched normal tissue. Scale bars indicate 100  $\mu$ m. Data were representatives of three independent experiments. **(b)** Immunoblots for MDK expression in indicated GBM tumor-spheres with or without FBS-induced differentiation condition. Data were representatives of three independent experiments. **(c)** Western blot analyses for indicated proteins on the treatment of control NT or an shMDK-1 were demonstrated. Data were representatives of three independent experiments. GAPDH was used as a loading control.

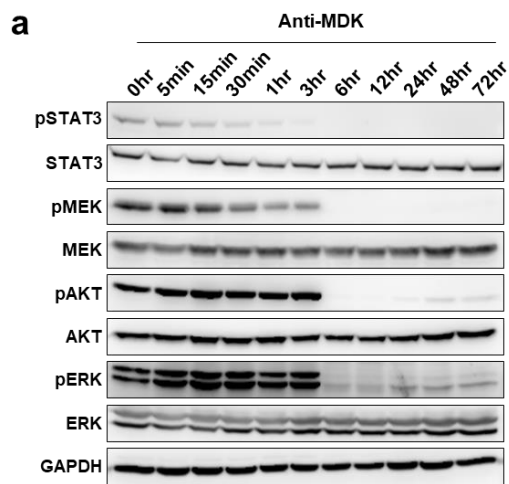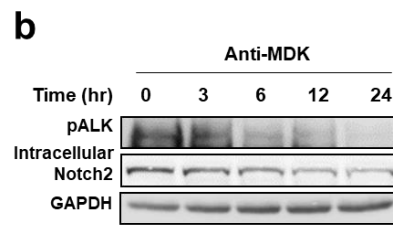

**Supplementary Figure 7.** (a and b) Immunoblots for indicated proteins on the treatment of an anti-MDK antibody at the indicated time points. GAPDH was used as a loading control.

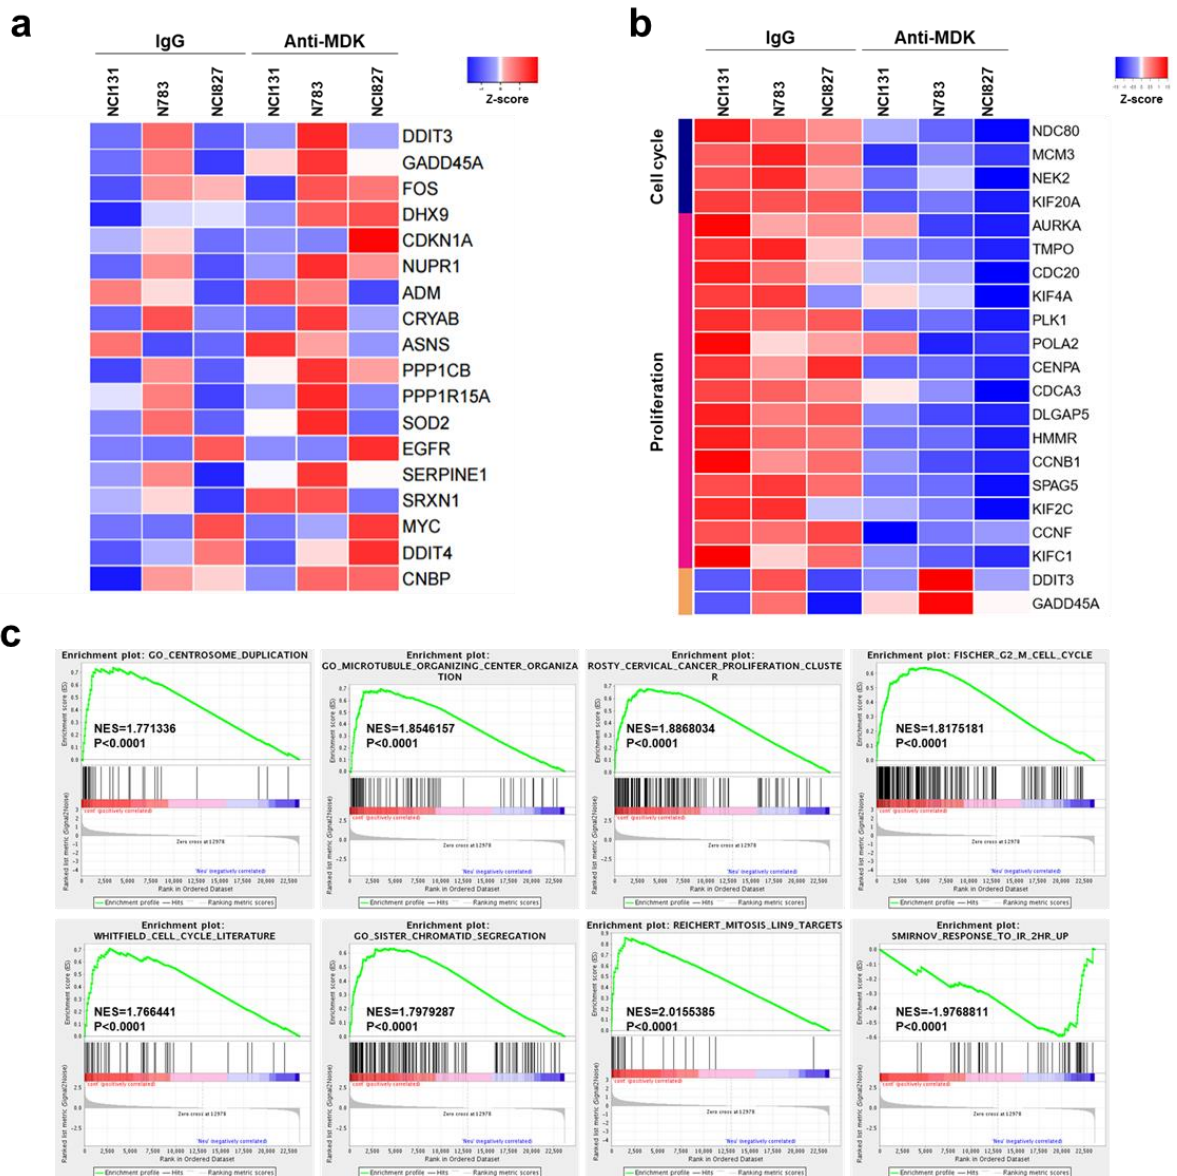

**Supplementary Figure 8.** Heatmaps for differentially expressed genes (DEG) associated with **(a)** oxidative stress-response or redox signaling, **(b)** cell cycle, proliferation and apoptosis processes between IgG and anti-MDK antibody (20  $\mu$ g/ml, 12 h) treated NCI131, N783 and NCI827 cells were demonstrated. **(c)** GSEA results of control and MDK inhibition group of cells.

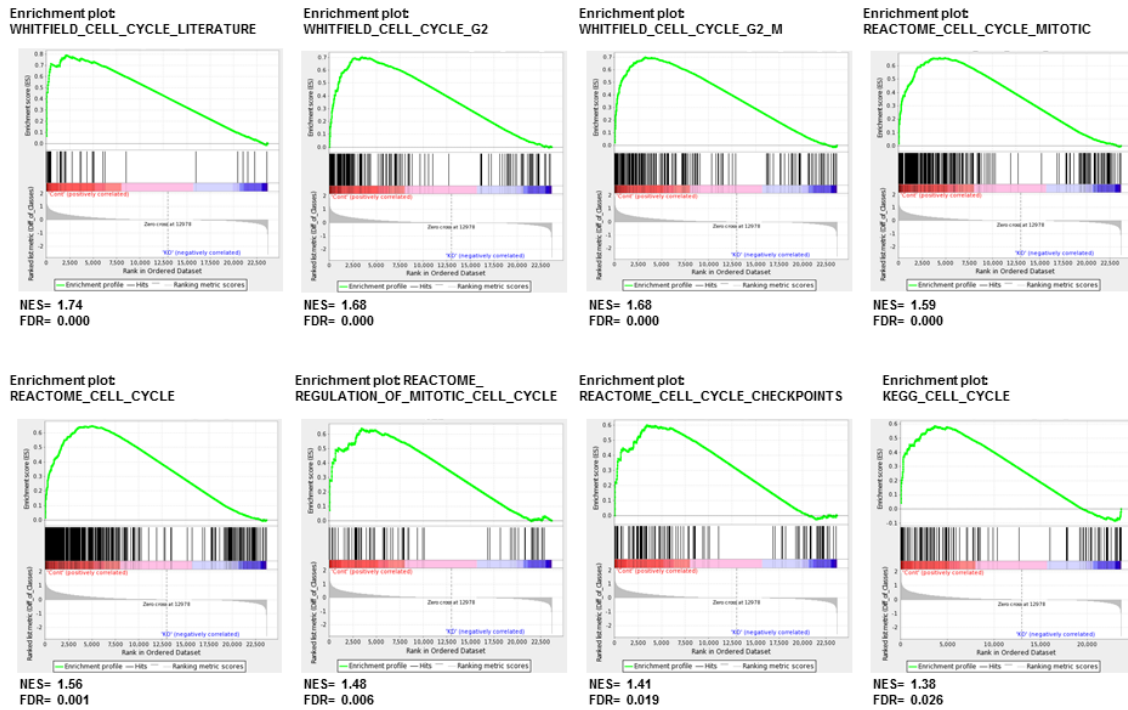

**Supplementary Figure 9.** Enrichment plots for indicated gene sets on the treatment of an anti-MDK antibody (20  $\mu$ g/ml, 12 h), compared to IgG control.

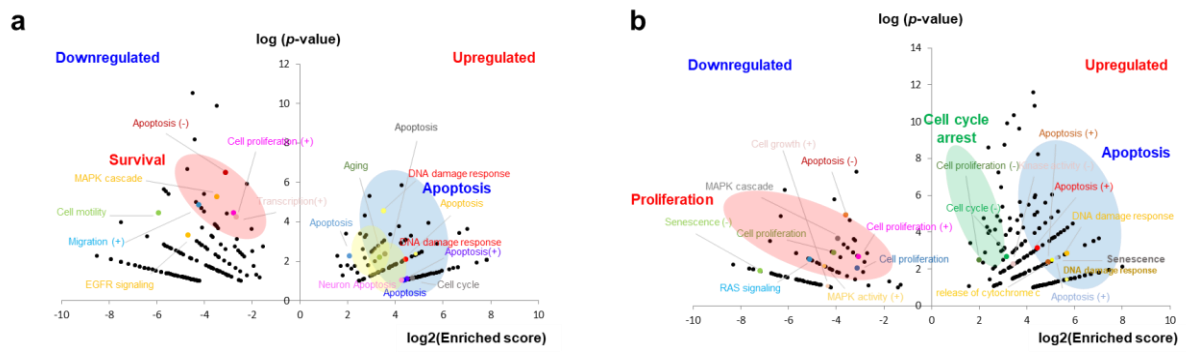

**Supplementary Figure 10.** Volcano plots represent the enrichment score (x-axis) and significance (y-axis) of enriched pathways (GO BP on DAVID) upregulated (right, red) and downregulated (left, blue) on the treatment of an anti-MDK antibody (20  $\mu$ g/ml, 12 h) using protein array data in **(a)** NCI827 and **(b)** NCI1131 cells.

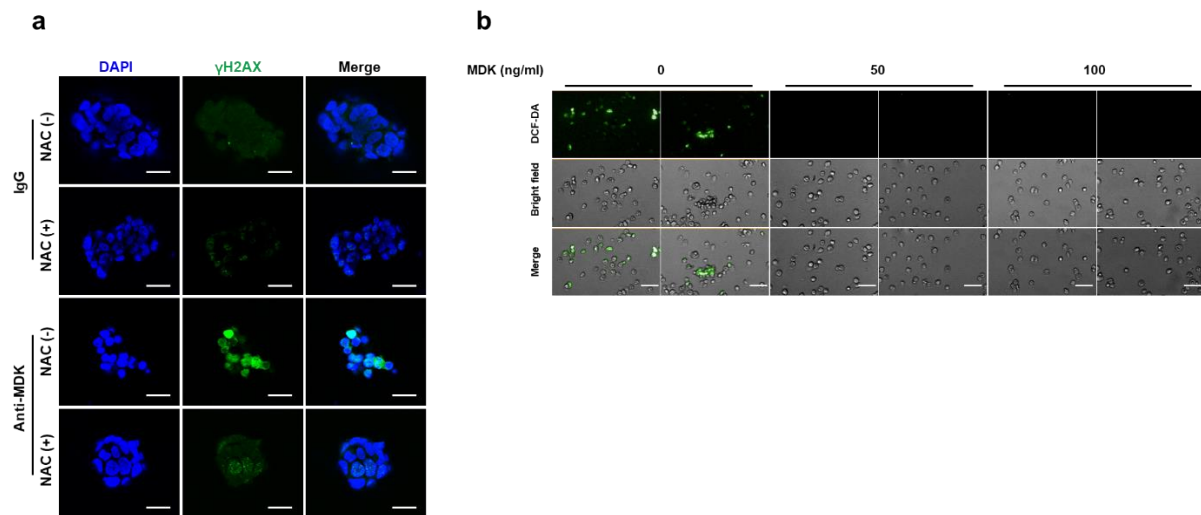

**Supplementary Figure 11. (a)** Immunofluorescence images for DAPI (blue) and/or phosphor- $\gamma$  H2AX (green) on the treatment of control IgG and an anti-MDK antibody (5  $\mu$ g/ml, 5 h) with or without N-acetylcysteine (NAC, 100  $\mu$ M) in GBM tumor-spheres. Scale bars indicate 20  $\mu$ m. **(b)** Green fluorescence and/or brightfield images on DCF-DA stained NCI827 cells upon the treatment of recombinant MDK as indicated doses for 6 h were demonstrated. Bars indicate 50  $\mu$ m.

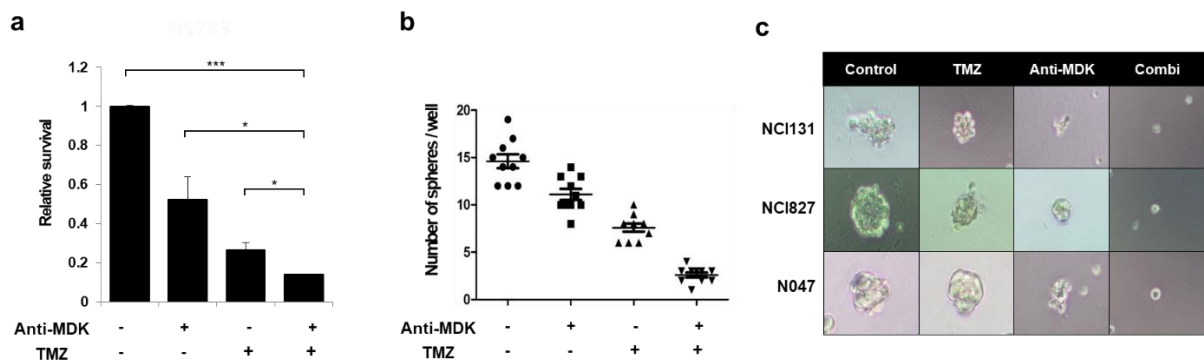

**Supplementary Figure 12.** Relative cell survival on the treatment of IgG control or an anti-MDK antibody (1  $\mu\text{g}/\text{ml}$ ) with or without temozolomide (TMZ, 100  $\mu\text{M}$ ) in N783 cell was demonstrated as a **(a)** bar graph. Each bar was presented as mean  $\pm$  SD. P values were obtained using paired t-test (\* $p < 0.05$  and \*\*\* $p < 0.001$ ). **(b)** Number of spheres per well ( $n = 10$  per group) on the groups shown at (A) was presented as a vertical scattered plot, and the **(c)** representative tumor-sphere images in NCI131, NCI827 and N047 cells were displayed.

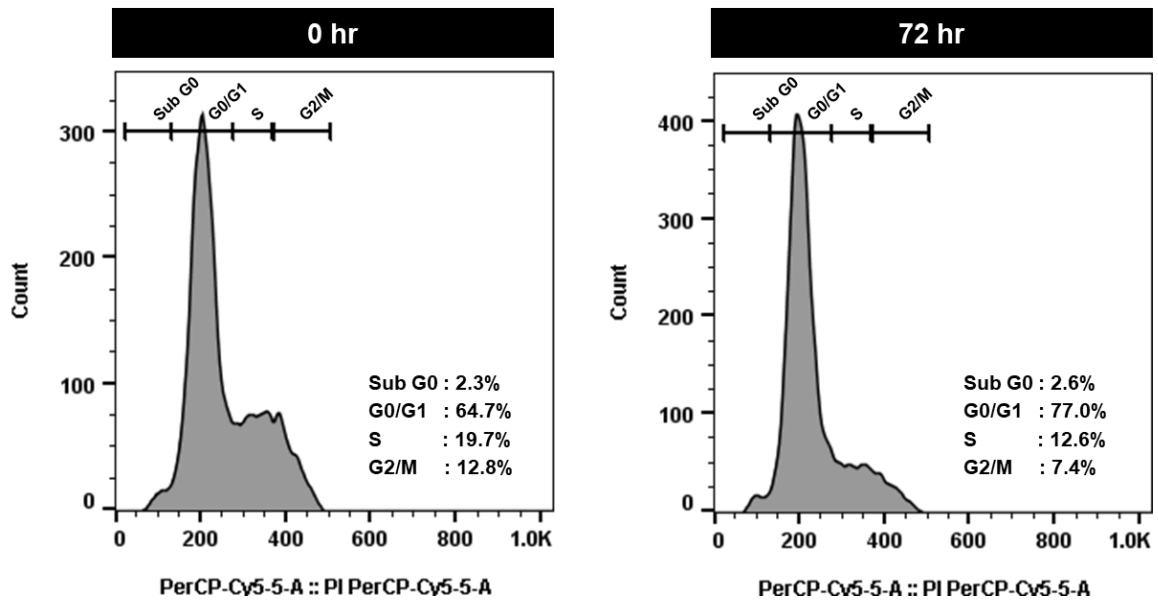

**Supplementary Figure 13.** Flow cytometric cell cycle analyses on control or anti-MDK (1 µg/ml) treatment NCI131 cells at 72 h were demonstrated.

**a**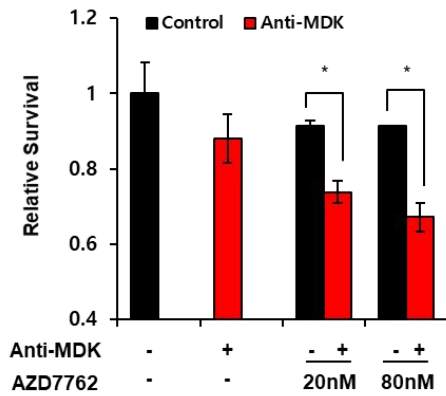**b**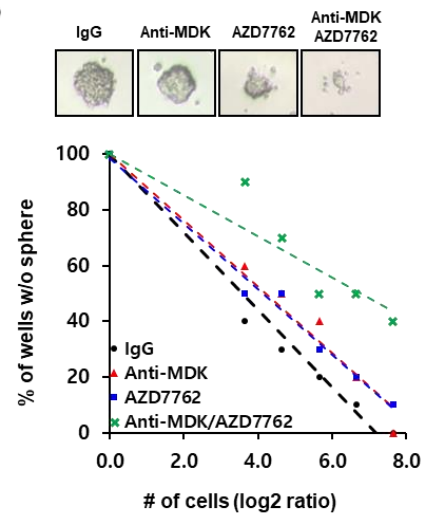

**Supplementary Figure 14. (a)** The relative survival of control (black bar) and anti-MDK antibody (5  $\mu\text{g/ml}$ , red bar) with or without AZD7762 (Selleckchem) was demonstrated as bar graphs. Statistical significance was calculated using student t-test. ( $*p < 0.5$ ) **(b)** An LDA plot and representative sphere images of control and treatment of anti-MDK with or without AZD7762 were demonstrated.

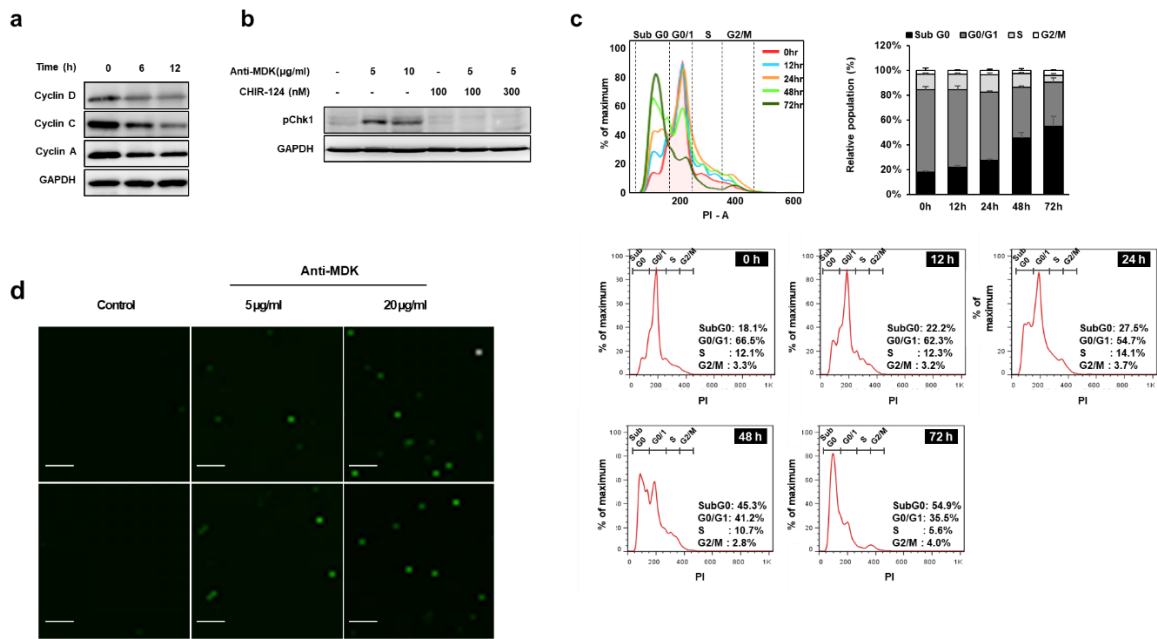

**Supplementary Figure 15.** (a) Western blot analyses for indicated proteins on anti-MDK treated NCI827 cells for indicated time were demonstrated. (b) Western blots for indicated proteins on the treatment of an anti-MDK antibody and/or CHIR-124 as indicated doses at 12 h were displayed. Data were representatives for three independent experiments. GAPDH was used as a loading control. (c) Flow cytometry-based cell cycle analysis of NCI827 cells on the treatment of an anti-MDK antibody (20  $\mu\text{g/ml}$ ) for indicated time (left and bottom), and their quantification was demonstrated (right). (d) Immunofluorescence images for detecting caspase 3/7 positive cells on control or anti-MDK antibody treated NCI827 cells as indicated doses were displayed. Data were representatives for three independent experiments.

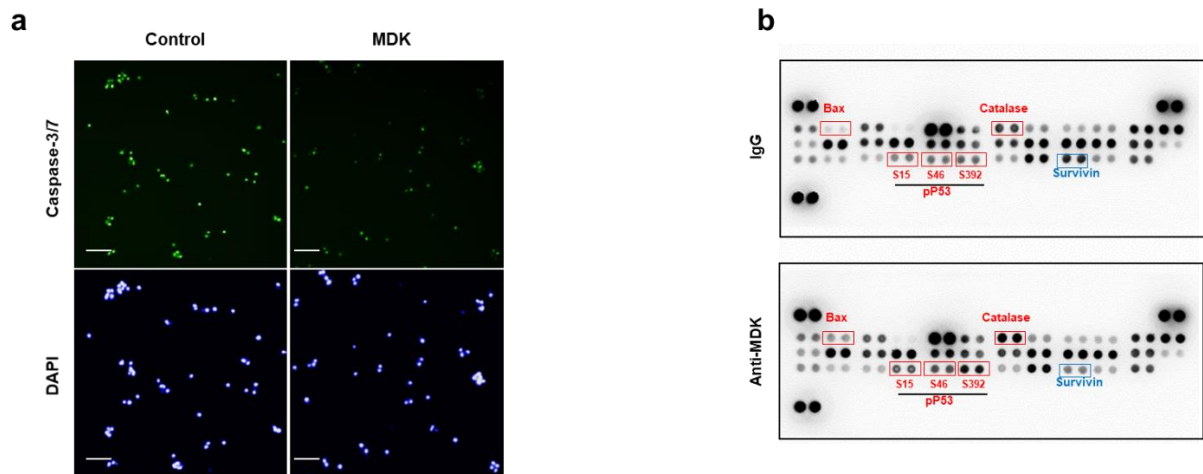

**Supplementary Figure 16. (a)** Immunofluorescence analyses for caspase 3/7 induced by TBHP (50  $\mu$ M) on control or recombinant MDK (10 ng/ml) treated cells were demonstrated. Scale bars indicate 50  $\mu$ m. Data were representatives for three independent experiments. **(b)** Apoptosis array was demonstrated on control IgG or an anti-MDK antibody treated (5  $\mu$ g/ml, 12h) NCI827 cells.

**a** More-sensitive: 8 cases

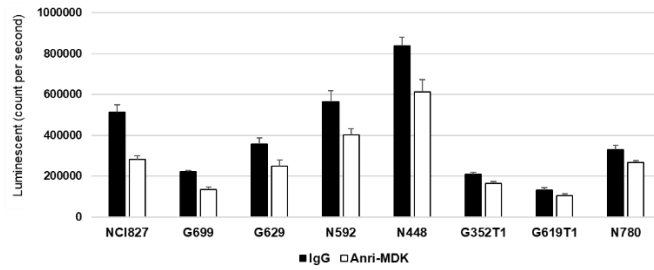

**b** Less-sensitive: 11 cases

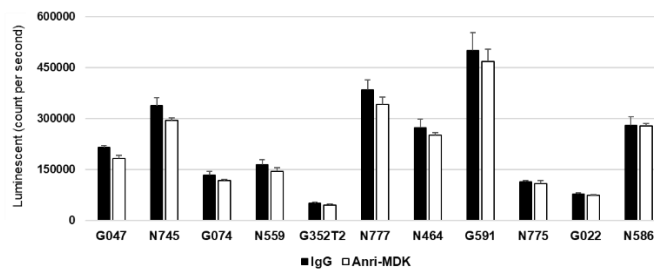

**c**

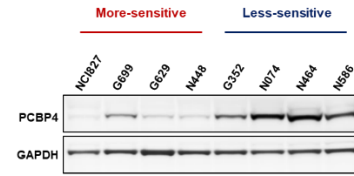

**Supplementary Figure 17.** The cell viabilities based on cellular ATP (luminescent) level measured by ATPlite on the treatment of control IgG (black bars) or an anti-MDK antibody (5  $\mu\text{g}/\text{ml}$ , 4 days, white bars) in more-sensitive ( $n=8$ , **a**) and less sensitive ( $n=11$ , **b**) cells were demonstrated by bar graphs. **(c)** Immunoblots for PCBP4 expression level in representative cells with “more sensitive” and “less sensitive” to anti-MDK treatment ( $n=4$  for each group). Data were representatives of three independent experiments. GAPDH was used as a loading control.

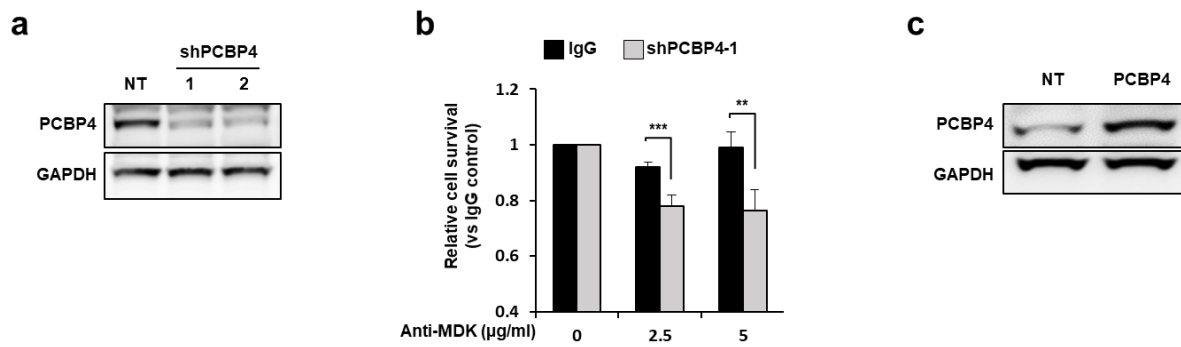

**Supplementary Figure 18.** Western blot analyses for PCBP4 expressions on cells transfected with **(a)** NT or two shRNAs targeting *PCBP4* gene, and **(c)** ectopic expression of PCBP4 were demonstrated. GAPDH was used as a loading control. Data were representatives of three independent experiments. **(b)** Relative survival on an anti-MDK treatment at indicated doses (4 days), normalized to cell viability of IgG control group in N464 cells transfected with NT or shPCBP4 constructs

**Supplementary Table 1.** Summary of identified secretome in conditioned media from NCI131 and N783 cells.

| Sample ID | Identified protein | Classical secretion <sup>a</sup> | Non-classical secretion <sup>b</sup> | Membrane protein <sup>c</sup> | Others <sup>d</sup> | Percentage of predicted secreted proteins |
|-----------|--------------------|----------------------------------|--------------------------------------|-------------------------------|---------------------|-------------------------------------------|
| NCI131    | 471                | 125                              | 130                                  | 6                             | 210                 | 54.1                                      |
| N783      | 389                | 77                               | 128                                  | 3                             | 181                 | 52.7                                      |
| Total     | 630                | 152                              | 194                                  | 9                             | 275                 | 54.9                                      |

<sup>a</sup>Proteins predicted by the **SignalP** program to be secreted via the classical secretion pathway (SignalP 0.45 D-cutoff for noTM networks or 0.5 D-cutoff for TM networks).

<sup>b</sup>Proteins predicted to be secreted by the nonclassical secretion pathway using **SignalP** and **SecretomeP** (SignalP < D-cutoff and SecretomeP N-N score  $\geq$  0.50).

<sup>c</sup>Proteins predicted by the **TMHMM** to form integral membrane proteins that were not predicted to be secreted via the classical or nonclassical secretion pathways.

<sup>d</sup>Proteins that could not be classified as classical secreted, nonclassical secreted, integral membrane proteins or unspecified.

**Supplementary Table 2. List of identified proteins in secretome analysis**

| Accession | Names                    | Length | NCI131 | N783 | Subcellular localization category | predicted secretion       | SignalP | SecretomeP | TMHMM |
|-----------|--------------------------|--------|--------|------|-----------------------------------|---------------------------|---------|------------|-------|
| Q04446    | GBE1                     | 702    |        | 0    | Multiple location                 | others                    | N       | 0.455      | N     |
| P61604    | HSPE1                    | 102    |        | 0    | Secretion                         | nonclassical secretion    | N       | 0.57       | N     |
| Q9NRX4    | IPT1 PHP14 CGI-202 HSPC1 | 125    | 0      | 0    | Cytoplasmic                       | others                    | N       | 0.32       | N     |
| P62258    | YWHAE                    | 255    | 0      | 0    | Cytoplasmic                       | others                    | N       | 0.33       | N     |
| P61981    | YWHAH                    | 247    | 0      | 0    | Cytoplasmic                       | others                    | N       | 0.29       | N     |
| P63104    | YWHAZ                    | 245    | 0      | 0    | Cytoplasmic                       | others                    | N       | 0.252      | N     |
| Q16698    | DECR1 DECR SDR18C1       | 335    | 0      |      | Secretion                         | nonclassical secretion    | N       | 0.621      | N     |
| P55036    | PSMD4 MCB1               | 377    |        | 0    | Multiple location                 | others                    | N       | 0.22       | N     |
| Q16401    | PSMD5 KIAA0072           | 504    |        | 0    | Secretion                         | nonclassical secretion    | N       | 0.558      | N     |
| O43598    | DNPH1 C6orf108 RCL       | 174    |        | 0    | Secretion                         | nonclassical secretion    | N       | 0.582      | N     |
| O95861    | BPNT1                    | 308    | 0      | 0    | Secretion                         | nonclassical secretion    | N       | 0.682      | N     |
| P31937    | HIBADH                   | 336    | 0      | 0    | Secretion                         | nonclassical secretion    | N       | 0.61       | N     |
| P42765    | ACAA2                    | 397    | 0      |      | Organelar                         | others                    | N       | 0.403      | N     |
| P46783    | RPS10                    | 165    |        | 0    | Secretion                         | nonclassical secretion    | N       | 0.659      | N     |
| P62280    | RPS11                    | 158    |        | 0    | Secretion                         | nonclassical secretion    | N       | 0.754      | N     |
| P25398    | RPS12                    | 132    | 0      | 0    | Secretion                         | nonclassical secretion    | N       | 0.661      | N     |
| P62249    | RPS16                    | 146    | 0      | 0    | Secretion                         | nonclassical secretion    | N       | 0.735      | N     |
| P63220    | RPS21                    | 83     |        | 0    | Secretion                         | nonclassical secretion    | N       | 0.709      | N     |
| P61247    | RPS3A FTE1 MFTL          | 264    |        | 0    | Secretion                         | nonclassical secretion    | N       | 0.68       | N     |
| P62701    | RPS4X CCG2 RPS4 SCAR     | 263    |        | 0    | Secretion                         | nonclassical secretion    | N       | 0.606      | N     |
| P46782    | RPS5                     | 204    |        | 0    | Secretion                         | nonclassical secretion    | N       | 0.78       | N     |
| P62241    | RPS8 OK/SW-cl.83         | 208    |        | 0    | Multiple location                 | others                    | N       | 0.417      | N     |
| P08865    | RPSA LAMBR LAMR1         | 295    | 0      | 0    | Secretion                         | nonclassical secretion    | N       | 0.62       | N     |
| Q9BRK5    | SDF4 CAB45 PSEC0034      | 362    | 0      | 0    | Secretion                         | classical secretion       | Y       | 0.591      | Y     |
| P08195    | SLC3A2 MDU1              | 630    |        | 0    | Secretion                         | nonclassical secretion    | N       | 0.644      | Y     |
| P49189    | _DH9A1 ALDH4 ALDH7 ALDI  | 494    |        | 0    | Cytoplasmic                       | others                    | N       | 0.49       | N     |
| P10809    | HSPD1 HSP60              | 573    | 0      | 0    | Organelar                         | others                    | N       | 0.289      | N     |
| P05388    | RPLP0                    | 317    | 0      | 0    | Multiple location                 | others                    | N       | 0.15       | N     |
| P05386    | RPLP1 RRP1               | 114    | 0      | 0    | Cytoplasmic                       | others                    | N       | 0.406      | N     |
| P05387    | RPLP2 D11S2243E RPP2     | 115    | 0      | 0    | Multiple location                 | others                    | N       | 0.265      | N     |
| P62906    | RPL10A NEDD6             | 217    |        | 0    | Secretion                         | nonclassical secretion    | N       | 0.637      | N     |
| P30050    | RPL12                    | 165    | 0      | 0    | Secretion                         | nonclassical secretion    | N       | 0.865      | N     |
| P84098    | RPL19                    | 196    |        | 0    | Multiple location                 | others                    | N       | 0.301      | N     |
| P62829    | RPL23                    | 140    |        | 0    | Secretion                         | nonclassical secretion    | N       | 0.825      | N     |
| P39023    | RPL3 OK/SW-cl.32         | 403    |        | 0    | Secretion                         | nonclassical secretion    | N       | 0.537      | N     |
| P63173    | RPL38                    | 70     |        | 0    | Secretion                         | nonclassical secretion    | N       | 0.773      | N     |
| P36578    | RPL4 RPL1                | 427    |        | 0    | Multiple location                 | others                    | N       | 0.24       | N     |
| P46777    | RPL5 MSTP030             | 297    | 0      | 0    | Multiple location                 | others                    | N       | 0.413      | N     |
| P62424    | RPL7A SURF-3 SURF3       | 266    |        | 0    | Multiple location                 | others                    | N       | 0.423      | N     |
| P52209    | PGD PGDH                 | 483    | 0      | 0    | Cytoplasmic                       | others                    | N       | 0.426      | N     |
| O95336    | PGLS                     | 258    |        | 0    | Secretion                         | nonclassical secretion    | N       | 0.87       | N     |
| P08253    | MMP2 CLG4A               | 660    | 0      | 0    | Secretion                         | classical secretion       | Y       | 0.514      | N     |
| P11021    | HSPA5 GRP78              | 654    | 0      | 0    | Secretion                         | classical secretion       | Y       | 0.745      | N     |
| Q9BWD1    | ACAT2 ACTL               | 397    | 0      | 0    | Secretion                         | nonclassical secretion    | N       | 0.726      | N     |
| Q13510    | ASAH1 ASAH HSD-33 HSD3   | 395    | 0      | 0    | Secretion                         | classical secretion       | Y       | 0.846      | N     |
| P39687    | 32A C15orf1 LANP MAMP P1 | 249    | 0      | 0    | Multiple location                 | others                    | N       | 0.098      | N     |
| Q9BTT0    | ANP32E                   | 268    | 0      | 0    | Multiple location                 | others                    | N       | 0.128      | N     |
| Q99798    | AC02                     | 780    | 0      | 0    | Organelar                         | others                    | N       | 0.413      | N     |
| P60709    | ACTB                     | 375    | 0      | 0    | Cytoplasmic                       | others                    | N       | 0.498      | N     |
| O96019    | CTL6A BAF53 BAF53A INO80 | 429    | 0      | 0    | Nucleus                           | others                    | N       | 0.479      | N     |
| P61160    | ACTR2 ARP2               | 394    | 0      | 0    | Cytoplasmic                       | others                    | N       | 0.311      | N     |
| Q92747    | ARPC1A SOP2L             | 370    | 0      | 0    | Cytoplasmic                       | others                    | N       | 0.29       | N     |
| O15144    | ARPC2 ARC34 PRO2446      | 300    | 0      | 0    | Cytoplasmic                       | others                    | N       | 0.36       | N     |
| P61158    | ACTR3 ARP3               | 418    | 0      | 0    | Cytoplasmic                       | others                    | N       | 0.443      | N     |
| Q6VMQ6    | ATF7IP MCAF MCAF1        | 1270   |        | 0    | Nucleus                           | others                    | N       | 0.344      | N     |
| P13798    | EH D3F15S2 D3S48E DNF1   | 732    | 0      | 0    | Secretion                         | nonclassical secretion    | N       | 0.547      | N     |
| P07108    | DBI                      | 87     |        | 0    | Secretion                         | nonclassical secretion    | N       | 0.546      | N     |
| P46108    | CRK                      | 304    |        | 0    | Multiple location                 | others                    | N       | 0.467      | N     |
| P23526    | AHCY SAHH                | 432    | 0      | 0    | Secretion                         | nonclassical secretion    | N       | 0.507      | N     |
| P54819    | AK2 ADK2                 | 239    | 0      | 0    | Secretion                         | nonclassical secretion    | N       | 0.823      | N     |
| P30520    | ADSS ADSS2               | 456    | 0      | 0    | Cytoplasmic                       | others                    | N       | 0.453      | N     |
| Q01518    | CAP1 CAP                 | 475    | 0      | 0    | Membrane                          | others                    | N       | 0.429      | N     |
| Q8IUX7    | AEBP1 ACLP               | 1158   | 0      | 0    | Secretion                         | classical secretion       | Y       | 0.118      | N     |
| Q9UKK9    | NUDT5 NUDIX5 HSPC115     | 219    | 0      | 0    | Nucleus                           | others                    | N       | 0.188      | N     |
| O43488    | AKR7A2 AFAR AFAR1 AKR7   | 359    | 0      | 0    | Secretion                         | nonclassical secretion    | N       | 0.734      | N     |
| O00468    | AGRN AGRIN               | 2067   | 0      | 0    | Secretion                         | classical secretion       | Y       | 0.293      | N     |
| P14550    | AKR1A1 ALDR1 ALR         | 325    | 0      | 0    | Multiple location                 | others                    | N       | 0.49       | N     |
| P11766    | ADH5 ADHX FDH            | 374    | 0      | 0    | Cytoplasmic                       | others                    | N       | 0.369      | N     |
| P15121    | AKR1B1 ALDR1             | 316    | 0      | 0    | Cytoplasmic                       | others                    | N       | 0.395      | N     |
| P01023    | A2M CPAMD5 FWP007        | 1474   | 0      | 0    | Secretion                         | classical secretion       | Y       | 0.596      | N     |
| P12814    | ACTN1                    | 892    | 0      | 0    | Cytoplasmic                       | others                    | N       | 0.431      | N     |
| O43707    | ACTN4                    | 911    | 0      | 0    | Multiple location                 | others                    | N       | 0.418      | N     |
| O43768    | ENSA                     | 121    | 0      | 0    | Secretion                         | nonclassical secretion    | N       | 0.825      | N     |
| P06733    | ENO1 ENO1L1 MBPB1 MPB1   | 434    | 0      | 0    | Secretion                         | nonclassical secretion    | N       | 0.536      | N     |
| Q16706    | MAN2A1 MANA2             | 1144   | 0      | 0    | Secretion                         | nonclassical secretion    | N       | 0.661      | Y     |
| P54802    | NAGLU UFHSD1             | 743    | 0      | 0    | Secretion                         | classical secretion       | Y       | 0.583      | N     |
| Q9H4A4    | RNPEP APB                | 650    | 0      | 0    | Secretion                         | nonclassical secretion    | N       | 0.554      | N     |
| P05067    | APP A4 AD1               | 770    | 0      | 0    | Secretion                         | classical secretion       | Y       | 0.441      | Y     |
| Q06481    | APLP2 APPL2              | 763    | 0      | 0    | Secretion                         | classical secretion       | Y       | 0.507      | Y     |
| P01019    | AGT SERPINA8             | 485    |        | 0    | Secretion                         | classical secretion       | Y       | 0.751      | N     |
| P04083    | ANXA1 ANX1 LPC1          | 346    | 0      | 0    | Secretion                         | nonclassical secretion    | N       | 0.511      | N     |
| P08758    | ANXA5 ANX5 ENX2 PP4      | 320    | 0      | 0    | Secretion                         | nonclassical secretion    | N       | 0.55       | N     |
| P08133    | ANXA6 ANX6               | 673    | 0      | 0    | Cytoplasmic                       | others                    | N       | 0.334      | N     |
| P02649    | APOE                     | 317    | 0      | 0    | Secretion                         | classical secretion       | Y       | 0.88       | N     |
| P15289    | ARSA                     | 507    | 0      | 0    | Secretion                         | classical secretion       | Y       | 0.831      | N     |
| O43776    | NARS                     | 548    | 0      | 0    | Cytoplasmic                       | others                    | N       | 0.406      | N     |
| P17174    | GOT1                     | 413    | 0      | 0    | Cytoplasmic                       | others                    | N       | 0.439      | N     |
| P00505    | GOT2                     | 430    | 0      | 0    | Secretion                         | nonclassical secretion    | N       | 0.505      | N     |
| Q9LUA0    | DNPEP ASPEP DAP          | 475    |        | 0    | Cytoplasmic                       | others                    | N       | 0.347      | N     |
| P06576    | ATP5B ATPMB ATPSB        | 529    | 0      | 0    | Secretion                         | nonclassical secretion    | N       | 0.591      | N     |
| P61221    | RNASEL1 RNASELI RNS41 (  | 599    |        | 0    | Cytoplasmic                       | others                    | N       | 0.296      | N     |
| P17858    | PFKL                     | 780    | 0      | 0    | Cytoplasmic                       | others                    | N       | 0.417      | N     |
| O75882    | ATRN KIAA0548 MGCA       | 1429   | 0      | 0    | Secretion                         | membrane integral protein | N       | 0.298      | Y     |
| P15291    | B4GALT1 GGTB2            | 398    | 0      | 0    | Secretion                         | nonclassical secretion    | N       | 0.732      | Y     |
| O43505    | B4GAT1 B3GNT1 B3GNT6     | 415    |        | 0    | Secretion                         | nonclassical secretion    | N       | 0.914      | Y     |
| P61769    | 32M CDABP0092 HDCMA22I   | 119    | 0      | 0    | Secretion                         | classical secretion       | Y       | 0.907      | N     |
| P08236    | GUSB                     | 651    | 0      | 0    | Secretion                         | classical secretion       | Y       | 0.582      | Y     |
| P06865    | HEXA                     | 529    | 0      | 0    | Secretion                         | classical secretion       | Y       | 0.701      | N     |

|        |                           |      |   |   |                   |                        |   |       |   |
|--------|---------------------------|------|---|---|-------------------|------------------------|---|-------|---|
| P07686 | HEXB HCC7                 | 556  | O | O | Secretion         | nonclassical secretion | N | 0.712 | Y |
| P21810 | BGN SLRR1A                | 368  |   | O | Secretion         | classical secretion    | Y | 0.714 | N |
| P54687 | BCAT1 BCT1 ECA39          | 386  | O | O | Secretion         | nonclassical secretion | N | 0.507 | N |
| Q96GW7 | BEHAB CSPG7 UNQ2525/PF    | 911  |   | O | Secretion         | classical secretion    | Y | 0.522 | N |
| Q9HCU4 | 2 CDHF10 EGFL2 KIAA0279   | 2923 | O | O | Secretion         | classical secretion    | Y | 0.327 | Y |
| P19022 | CDH2 CDHN NCAD            | 906  | O | O | Secretion         | classical secretion    | Y | 0.203 | Y |
| Q9Y2V2 | CARHSP1                   | 147  |   | O | Secretion         | nonclassical secretion | N | 0.83  | N |
| Q9HB71 | CYBP S100A6BP SIP PNAS-   | 228  | O | O | Secretion         | nonclassical secretion | N | 0.69  | N |
| Q05682 | CALD1 CAD CDM             | 793  |   | O | Cytoplasmic       | others                 | N | 0.443 | N |
| P62158 | ALM2 CAM2 CAMB; CALM3     | 149  | O | O | Secretion         | nonclassical secretion | N | 0.676 | N |
| Q5T5Y3 | CAMSAP1                   | 1602 |   | O | Cytoplasmic       | others                 | N | 0.135 | N |
| P20810 | CAST                      | 708  | O | O | Cytoplasmic       | others                 | N | 0.092 | N |
| Q15417 | CNN3                      | 329  | O | O | Secretion         | nonclassical secretion | N | 0.643 | N |
| P27797 | CALR CRTC                 | 417  | O | O | Secretion         | classical secretion    | Y | 0.366 | N |
| Q94985 | CLSTN1 CS1 KIAA0911       | 981  | O | O | Secretion         | classical secretion    | Y | 0.436 | Y |
| Q43852 | CALU                      | 315  | O | O | Secretion         | classical secretion    | Y | 0.753 | N |
| Q14444 | I1 GPIAP1 GPIP137 M11S1 I | 709  | O | O | Cytoplasmic       | others                 | N | 0.099 | N |
| Q43570 | CA12                      | 354  |   | O | Secretion         | classical secretion    | Y | 0.323 | Y |
| P00918 | CA2                       | 260  | O | O | Multiple location | others                 | N | 0.411 | N |
| P16152 | CBR1 CBR CRN SDR21C1      | 277  | O | O | Secretion         | nonclassical secretion | N | 0.633 | N |
| O75828 | CBR3                      | 277  |   | O | Secretion         | nonclassical secretion | N | 0.674 | N |
| P16870 | CPE                       | 476  | O | O | Secretion         | classical secretion    | Y | 0.464 | N |
| P68400 | CSNK2A1 CK2A1             | 391  | O | O | Secretion         | nonclassical secretion | N | 0.735 | N |
| P19784 | CSNK2A2 CK2A2             | 350  |   | O | Secretion         | others                 | N | 0.295 | N |
| P07858 | CTSB CPSB                 | 339  | O | O | Secretion         | classical secretion    | Y | 0.77  | N |
| Q9UBR2 | CTSZ                      | 303  | O | O | Secretion         | classical secretion    | Y | 0.861 | Y |
| Q6YHK3 | CD109 CPAMD7              | 1445 | O | O | Secretion         | classical secretion    | Y | 0.6   | N |
| Q5ZPR3 | B7H3 PSEC0249 UNQ309/F    | 534  | O | O | Secretion         | classical secretion    | Y | 0.65  | Y |
| P60033 | CD81 TAPA1 TSPAN28        | 236  |   | O | Secretion         | nonclassical secretion | N | 0.501 | Y |
| Q8NFZ8 | ADM4 IGSF4C NECL4 TSLL    | 388  |   | O | Secretion         | classical secretion    | Y | 0.66  | Y |
| P36222 | CHI3L1                    | 383  | O | O | Secretion         | classical secretion    | Y | 0.645 | N |
| O00299 | CLIC1 G6 NCC27            | 241  | O | O | Nucleus           | others                 | N | 0.395 | N |
| Q9Y696 | CLIC4                     | 253  | O | O | Secretion         | nonclassical secretion | N | 0.612 | N |
| Q13185 | CBX3                      | 183  | O | O | Secretion         | nonclassical secretion | N | 0.836 | N |
| Q6ZTR5 | 7 CHDC2 Cxor122 Cxor130 C | 3102 | O | O | Unknown           | others                 | N | 0.362 | N |
| Q00610 | LTC CLH17 CLTCL2 KIAA000  | 1675 | O | O | Secretion         | others                 | N | 0.427 | N |
| Q16630 | CPSF6 CFIM68              | 551  | O | O | Nucleus           | others                 | N | 0.231 | N |
| P10909 | CLU APOJ CLI KUB1 AAG4    | 449  | O | O | Secretion         | classical secretion    | Y | 0.826 | N |
| P23528 | CFL1 CFL                  | 166  | O | O | Secretion         | nonclassical secretion | N | 0.628 | N |
| Q4VC31 | CDC58                     | 144  | O | O | Secretion         | nonclassical secretion | N | 0.893 | N |
| Q14011 | CIRBP A18HNRNP CIRP       | 172  | O | O | Secretion         | nonclassical secretion | N | 0.77  | N |
| P02452 | COL1A1                    | 1464 | O | O | Secretion         | classical secretion    | Y | 0.206 | N |
| P12109 | COL6A1                    | 1028 | O | O | Secretion         | classical secretion    | Y | 0.234 | N |
| Q02388 | COL7A1                    | 2944 | O | O | Secretion         | classical secretion    | Y | 0.065 | N |
| P12110 | COL6A2                    | 1019 | O | O | Secretion         | classical secretion    | Y | 0.214 | N |
| P25940 | COL5A3                    | 1745 | O | O | Secretion         | classical secretion    | Y | 0.047 | N |
| P00736 | C1R                       | 705  | O | O | Secretion         | classical secretion    | Y | 0.697 | N |
| P0C0L4 | C4A CO4 CPAMD2            | 1744 | O | O | Secretion         | classical secretion    | Y | 0.399 | N |
| Q07021 | QBP GC1QBP HABP1 SF2F     | 282  | O | O | Secretion         | nonclassical secretion | N | 0.622 | N |
| P08603 | CFH HF HF1 HF2            | 1231 | O | O | Secretion         | classical secretion    | Y | 0.399 | N |
| P12277 | CKB CKBB                  | 381  | O | O | Cytoplasmic       | others                 | N | 0.258 | N |
| P46109 | CRKL                      | 303  | O | O | Secretion         | nonclassical secretion | N | 0.624 | N |
| P17812 | CTPS1 CTPS                | 591  | O | O | Cytoplasmic       | others                 | N | 0.388 | N |
| Q9UBG0 | EC13E ENDO180 KIAA0709    | 1479 | O | O | Secretion         | classical secretion    | Y | 0.491 | Y |
| Q13616 | CUL1                      | 776  | O | O | Nucleus           | others                 | N | 0.278 | N |
| P11802 | CDK4                      | 303  |   | O | Multiple location | others                 | N | 0.265 | N |
| P04080 | CSTB CST6 STFB            | 98   | O | O | Multiple location | others                 | N | 0.333 | N |
| P01034 | CST3                      | 146  | O | O | Secretion         | classical secretion    | Y | 0.937 | Y |
| P21291 | CSR1 CSR2 CYRP            | 193  |   | O | Nucleus           | others                 | N | 0.246 | N |
| P52943 | CRIP2 CRP2                | 208  | O | O | Secretion         | nonclassical secretion | N | 0.872 | N |
| P99999 | CYCS CYC                  | 105  | O | O | Organelar         | others                 | N | 0.465 | N |
| Q14204 | C1 DNCH1 DNCL DNECL D1    | 4646 | O | O | Cytoplasmic       | others                 | N | 0.267 | N |
| P28838 | LAP3 LAPEP PEPS           | 519  | O | O | Cytoplasmic       | others                 | N | 0.463 | N |
| O00154 | ACOT7 BACH                | 380  |   | O | Secretion         | nonclassical secretion | N | 0.666 | N |
| Q96KP4 | DP2 CN2 CPGI HEL-S-13 PI  | 475  | O | O | Cytoplasmic       | others                 | N | 0.443 | N |
| O43175 | PHGDH PGDH3               | 533  | O | O | Multiple location | others                 | N | 0.481 | N |
| Q9H773 | DCTPP1 XTP3TPA CDA03      | 170  |   | O | Secretion         | nonclassical secretion | N | 0.77  | N |
| P09417 | QDPR DHRP SDR33C1         | 244  | O | O | Organelar         | others                 | N | 0.442 | N |
| Q16555 | DPYSL2 CRMP2 ULIP2        | 572  | O | O | Multiple location | others                 | N | 0.411 | N |
| Q14195 | YSL3 CRMP4 DRP3 ULIP UL   | 570  | O | O | Cytoplasmic       | others                 | N | 0.444 | N |
| O14531 | DPYSL4 CRMP3 ULIP4        | 572  |   | O | Cytoplasmic       | others                 | N | 0.442 | N |
| Q12882 | DPYD                      | 1025 | O | O | Cytoplasmic       | others                 | N | 0.456 | N |
| P53634 | CTSC CPPI                 | 463  | O | O | Secretion         | classical secretion    | Y | 0.767 | N |
| Q9NY33 | DPP3                      | 737  | O | O | Cytoplasmic       | others                 | N | 0.408 | N |
| P27487 | DPP4 ADCP2 CD26           | 766  |   | O | Secretion         | nonclassical secretion | N | 0.719 | Y |
| Q13443 | 19 KIAA0021 MCMP MDC9 M   | 819  |   | O | Secretion         | classical secretion    | Y | 0.112 | Y |
| Q16531 | DDB1 XAP1                 | 1140 | O | O | Secretion         | nonclassical secretion | N | 0.554 | N |
| O00273 | DFFA DFF1 DFF45 H13       | 331  | O | O | Cytoplasmic       | others                 | N | 0.449 | N |
| P49736 | 12 BM28 CCN1 CDCL1 KIAA   | 904  | O | O | Nucleus           | others                 | N | 0.308 | N |
| P27695 | APE APE1 APEX APX HAP     | 318  | O | O | Secretion         | nonclassical secretion | N | 0.655 | N |
| Q9UBS4 | ERJ3 HDJ9 PSEC0121 UNC    | 358  |   | O | Secretion         | classical secretion    | Y | 0.707 | Y |
| Q13217 | DNAJC3 P58IPK PRKRI       | 504  | O | O | Secretion         | classical secretion    | Y | 0.38  | N |
| Q16643 | DBN1 D0S117E              | 649  |   | O | Cytoplasmic       | others                 | N | 0.091 | N |
| Q14118 | DAG1                      | 895  | O | O | Secretion         | classical secretion    | Y | 0.11  | Y |
| Q726Z7 | KIAA0312 KIAA1578 UREB1   | 4374 |   | O | Multiple location | others                 | N | 0.38  | N |
| Q15075 | EEA1 ZFYVE2               | 1411 |   | O | Cytoplasmic       | others                 | N | 0.11  | N |
| Q12805 | EFEMP1 FBLN3 FBNL         | 493  |   | O | Secretion         | classical secretion    | Y | 0.719 | N |
| O43854 | EDIL3 DEL1                | 480  | O | O | Secretion         | classical secretion    | Y | 0.821 | N |
| P68104 | EEF1A1 EEF1A EF1A LENGI   | 462  | O | O | Multiple location | others                 | N | 0.155 | N |
| P24534 | EEF1B2 EEF1B EF1B         | 225  |   | O | Secretion         | nonclassical secretion | N | 0.562 | N |
| P29692 | EEF1D EF1D                | 281  | O | O | Secretion         | nonclassical secretion | N | 0.529 | N |
| P13639 | EEF2 EF2                  | 858  | O | O | Multiple location | others                 | N | 0.38  | N |
| Q9NZ08 | ILS ARTS1 KIAA0525 UNQ5   | 941  | O | O | Secretion         | classical secretion    | Y | 0.609 | N |
| P14625 | HSP90B1 GRP94 TRA1        | 803  |   | O | Secretion         | classical secretion    | Y | 0.495 | N |
| Q9UNN8 | PROCR EPCR                | 238  |   | O | Secretion         | classical secretion    | Y | 0.916 | Y |
| Q9UH77 | ENOPH1 MASA MSTP145       | 261  | O | O | Secretion         | nonclassical secretion | N | 0.699 | N |
| P30084 | ECHS1                     | 290  | O | O | Secretion         | nonclassical secretion | N | 0.855 | N |
| P54756 | HA5 BSK EHK1 HEK7 TYRC    | 1037 | O | O | Membrane          | others                 | N | 0.401 | N |
| P61916 | NPC2 HE1                  | 151  | O | O | Secretion         | classical secretion    | Y | 0.931 | N |
| P30042 | C21orf33 HES1 KNPI        | 268  | O | O | Secretion         | classical secretion    | Y | 0.877 | N |
| P60842 | EIF4A1 DDX2A EIF4A        | 406  |   | O | Secretion         | nonclassical secretion | N | 0.631 | N |
| O60739 | EIF1B                     | 113  |   | O | Secretion         | nonclassical secretion | N | 0.712 | N |
| O15371 | EIF3D EIF3S7              | 548  | O | O | Cytoplasmic       | others                 | N | 0.203 | N |
| P23588 | EIF4B                     | 611  | O | O | Secretion         | nonclassical secretion | N | 0.573 | N |
| P63241 | EIF5A                     | 154  | O | O | Multiple location | others                 | N | 0.319 | N |

|         |                             |      |  |  |                   |                           |   |       |   |
|---------|-----------------------------|------|--|--|-------------------|---------------------------|---|-------|---|
| Q9GZV4  | EIF5A2                      | 153  |  |  | Multiple location | others                    | N | 0.254 | N |
| P43003  | LC1A3 EAAT1 GLAST GLAS      | 542  |  |  | Membrane          | membrane integral protein | N | 0.226 | Y |
| P15311  | EZR VIL2                    | 586  |  |  | Secretion         | nonclassical secretion    | N | 0.563 | N |
| P47755  | CAPZA2                      | 286  |  |  | Cytoplasmic       | others                    | N | 0.454 | N |
| P47756  | CAPZB                       | 277  |  |  | Secretion         | nonclassical secretion    | N | 0.543 | N |
| P14324  | FDPS FPS KIAA1293           | 419  |  |  | Secretion         | nonclassical secretion    | N | 0.639 | N |
| Q16658  | FSCN1 FAN1 HSN SNL          | 493  |  |  | Cytoplasmic       | others                    | N | 0.385 | N |
| P49327  | FASN FAS                    | 2511 |  |  | Cytoplasmic       | others                    | N | 0.408 | N |
| O15540  | FABP7 BLBP FABPB MRG        | 132  |  |  | Cytoplasmic       | others                    | N | 0.422 | N |
| Q01469  | FABP5                       | 135  |  |  | Cytoplasmic       | others                    | N | 0.363 | N |
| Q98ZK7  | TBL1XR1 IRA1 TBLR1          | 514  |  |  | Secretion         | nonclassical secretion    | N | 0.553 | N |
| Q96AC1  | ERMT2 KIND2 MIG2 PLEKH      | 680  |  |  | Multiple location | others                    | N | 0.267 | N |
| P02792  | FTL                         | 175  |  |  | Cytoplasmic       | others                    | N | 0.383 | N |
| P35555  | FBN1 FBN                    | 2871 |  |  | Secretion         | classical secretion       | Y | 0.391 | N |
| P02751  | FN1 FN                      | 2386 |  |  | Secretion         | classical secretion       | Y | 0.369 | N |
| Q53RD9  | FBLN7 TM14                  | 439  |  |  | Secretion         | classical secretion       | Y | 0.762 | N |
| P21333  | FLNA FLN FLN1               | 2647 |  |  | Cytoplasmic       | others                    | N | 0.446 | N |
| O75369  | FLNB FLN1L FLN3 TABP TAI    | 2602 |  |  | Cytoplasmic       | others                    | N | 0.359 | N |
| Q12841  | FSTL1 FRP                   | 308  |  |  | Secretion         | classical secretion       | Y | 0.533 | N |
| Q13642  | FHL1 SLIM1                  | 323  |  |  | Secretion         | nonclassical secretion    | N | 0.707 | N |
| P04075  | ALDOA ALDA                  | 364  |  |  | Cytoplasmic       | others                    | N | 0.356 | N |
| P09972  | ALDOC ALDC                  | 364  |  |  | Secretion         | others                    | N | 0.323 | N |
| P07954  | FH                          | 510  |  |  | Secretion         | nonclassical secretion    | N | 0.551 | N |
| P16930  | FAH                         | 419  |  |  | Secretion         | nonclassical secretion    | N | 0.582 | N |
| P09382  | LGALS1                      | 135  |  |  | Secretion         | others                    | N | 0.345 | N |
| P17931  | LGALS3 MAC2                 | 250  |  |  | Secretion         | nonclassical secretion    | N | 0.77  | N |
| Q08380  | LGALS3BP M2BP               | 585  |  |  | Secretion         | classical secretion       | Y | 0.738 | N |
| P09104  | ENO2                        | 434  |  |  | Secretion         | nonclassical secretion    | N | 0.599 | N |
| Q92820  | GGH                         | 318  |  |  | Secretion         | classical secretion       | Y | 0.628 | N |
| O75223  | GGCT C7orf24 CRF21          | 188  |  |  | Secretion         | nonclassical secretion    | N | 0.503 | N |
| P17900  | GM2A                        | 193  |  |  | Secretion         | classical secretion       | Y | 0.945 | N |
| Q9H488  | POFUT1 FUT12 KIAA0180       | 388  |  |  | Secretion         | classical secretion       | Y | 0.686 | N |
| Q13630  | TSTA3 SDR4E1                | 321  |  |  | Multiple location | others                    | N | 0.473 | N |
| P06396  | GSN                         | 782  |  |  | Secretion         | classical secretion       | Y | 0.553 | N |
| P07093  | SERPINE2 PI7 PN1            | 398  |  |  | Secretion         | classical secretion       | Y | 0.692 | N |
| P14136  | GFAP                        | 432  |  |  | Secretion         | nonclassical secretion    | N | 0.693 | N |
| P46926  | GNPDA1 GNPI HLN KIAA006     | 289  |  |  | Cytoplasmic       | others                    | N | 0.333 | N |
| Q8TDQ7  | GNPDA2 GNP2                 | 276  |  |  | Secretion         | nonclassical secretion    | N | 0.508 | N |
| P11413  | G6PD                        | 515  |  |  | Secretion         | others                    | N | 0.449 | N |
| P06744  | GPI                         | 558  |  |  | Secretion         | others                    | N | 0.453 | N |
| P00367  | GLUD1 GLUD                  | 558  |  |  | Organelar         | others                    | N | 0.363 | N |
| P15104  | GLUL GLNS                   | 373  |  |  | Cytoplasmic       | others                    | N | 0.394 | N |
| Q16769  | QPCT                        | 361  |  |  | Secretion         | classical secretion       | Y | 0.788 | N |
| P00390  | GSR GLUR GRD1               | 522  |  |  | Secretion         | nonclassical secretion    | N | 0.54  | N |
| P21266  | GSTM3 GST5                  | 225  |  |  | Cytoplasmic       | others                    | N | 0.329 | N |
| P78417  | GSTO1 GSTTLP28              | 241  |  |  | Cytoplasmic       | others                    | N | 0.435 | N |
| P09211  | GSTP1 FAEES3 GST3           | 210  |  |  | Secretion         | nonclassical secretion    | N | 0.545 | N |
| P48637  | GSS                         | 474  |  |  | Nucleus           | others                    | N | 0.484 | N |
| P04406  | H GAPD CDABP0047 OK/SV      | 335  |  |  | Multiple location | others                    | N | 0.467 | N |
| P50440  | GATM AGAT                   | 423  |  |  | Secretion         | nonclassical secretion    | N | 0.699 | N |
| P23434  | GCSH                        | 173  |  |  | Secretion         | classical secretion       | Y | 0.85  | N |
| P41250  | GARS                        | 739  |  |  | Secretion         | classical secretion       | Y | 0.483 | N |
| P11216  | PYGB                        | 843  |  |  | Cytoplasmic       | others                    | N | 0.422 | N |
| P06737  | PYGL                        | 847  |  |  | Multiple location | others                    | N | 0.381 | N |
| Q9HC38  | LOD4 C17orf25 CGI-150 Myc   | 313  |  |  | Secretion         | nonclassical secretion    | N | 0.721 | N |
| P35052  | GPC1                        | 558  |  |  | Secretion         | classical secretion       | Y | 0.33  | N |
| O75487  | GPC4 UNQ474/PRO937          | 556  |  |  | Secretion         | classical secretion       | Y | 0.687 | N |
| Q8NBJ4  | I55 GOLPH2 PSEC0242 UNC     | 401  |  |  | Secretion         | nonclassical secretion    | N | 0.547 | Y |
| Q8NCC3  | I2G15 LYPLA3 UNQ341/PRC     | 412  |  |  | Secretion         | classical secretion       | Y | 0.684 | N |
| P09341  | I GRO GRO1 GROA MGSA        | 107  |  |  | Secretion         | classical secretion       | Y | 0.624 | N |
| P30047  | GCHFR GFRP                  | 84   |  |  | Secretion         | nonclassical secretion    | N | 0.93  | N |
| P62826  | RAN ARA24 OK/SW-cl.81       | 216  |  |  | Secretion         | nonclassical secretion    | N | 0.582 | N |
| P08754  | GNAI3                       | 354  |  |  | Secretion         | nonclassical secretion    | N | 0.527 | N |
| P0DMV9  | HSPA1B                      | 641  |  |  | Cytoplasmic       | others                    | N | 0.28  | N |
| P34931  | HSPA1L                      | 641  |  |  | Multiple location | others                    | N | 0.37  | N |
| P34932  | HSPA4 APG2                  | 840  |  |  | Cytoplasmic       | others                    | N | 0.226 | N |
| P17066  | HSPA6 HSP70B                | 643  |  |  | Secretion         | others                    | N | 0.269 | N |
| P11142  | ISPA8 HSC70 HSP73 HSPA1     | 646  |  |  | Multiple location | others                    | N | 0.229 | N |
| O75506  | HSPB1 HSF1BP                | 76   |  |  | Nucleus           | others                    | N | 0.421 | N |
| P04792  | HSPB1 HSP27 HSP28           | 205  |  |  | Secretion         | nonclassical secretion    | N | 0.74  | N |
| P07900  | H90AA1 HSP90A HSPC1 HSI     | 732  |  |  | Multiple location | others                    | N | 0.173 | N |
| P08238  | H90AB1 HSP90B HSPC2 HSI     | 724  |  |  | Cytoplasmic       | others                    | N | 0.204 | N |
| Q9UK76  | HN1 ARM2                    | 154  |  |  | Nucleus           | others                    | N | 0.267 | N |
| Q14C28  | HEPACAM                     | 416  |  |  | Secretion         | classical secretion       | Y | 0.211 | Y |
| P51858  | HDFG HMG1L2                 | 240  |  |  | Multiple location | others                    | N | 0.477 | N |
| Q99729  | HNRNPAB ABBP1 HNRPAB        | 332  |  |  | Multiple location | others                    | N | 0.147 | N |
| Q32P51  | HNRNPA1L2 HNRNPA1L          | 320  |  |  | Multiple location | others                    | N | 0.135 | N |
| P51991  | HNRNPA3 HNRPA3              | 378  |  |  | Nucleus           | others                    | N | 0.112 | N |
| Q14103  | HNRNPD AUF1 HNRPD           | 355  |  |  | Multiple location | others                    | N | 0.107 | N |
| P52597  | HNRNPF HNRPF                | 415  |  |  | Nucleus           | others                    | N | 0.475 | N |
| P61978  | HNRNPK HNRPK                | 463  |  |  | Multiple location | others                    | N | 0.177 | N |
| O60506  | SYNCRIP HNRPQ NSAP1         | 623  |  |  | Multiple location | others                    | N | 0.081 | N |
| O43390  | HNRNRP HNRPR                | 633  |  |  | Multiple location | others                    | N | 0.077 | N |
| P22626  | HNRNPA2B1 HNRPA2B1          | 353  |  |  | Secretion         | others                    | N | 0.081 | N |
| P09429  | HMG1 HMG1                   | 215  |  |  | Secretion         | others                    | N | 0.068 | N |
| P17096  | HMG1 HMG1                   | 107  |  |  | Nucleus           | others                    | N | 0.407 | N |
| P49773  | HINT1 HINT PKC11 PRKCNH     | 126  |  |  | Secretion         | nonclassical secretion    | N | 0.553 | N |
| Q96KK5  | HIST1H2AH HIST1H2AI         | 128  |  |  | Secretion         | nonclassical secretion    | N | 0.563 | N |
| Q8IU66  | HIST2H2AB                   | 130  |  |  | Secretion         | nonclassical secretion    | N | 0.517 | N |
| O60814  | HIST1H2BK H2BFT HIRIP1      | 126  |  |  | Nucleus           | others                    | N | 0.305 | N |
| P62805  | H4/H4F/H4/H4M               | 103  |  |  | Nucleus           | others                    | N | 0.408 | N |
| Q9NIWY4 | HPF1 C4orf27                | 346  |  |  | Secretion         | nonclassical secretion    | N | 0.733 | N |
| P01892  | HLA-A HLAA                  | 365  |  |  | Secretion         | classical secretion       | Y | 0.214 | Y |
| P10314  | HLA-A HLAA                  | 365  |  |  | Secretion         | classical secretion       | Y | 0.186 | Y |
| Q9NSC5  | HOMER3                      | 361  |  |  | Multiple location | others                    | N | 0.096 | N |
| Q16836  | HADH HAD HADHSC SCHAI       | 314  |  |  | Organelar         | others                    | N | 0.492 | N |
| Q16775  | HAGH GLO2 HAGH1             | 308  |  |  | Secretion         | nonclassical secretion    | N | 0.633 | N |
| Q01581  | HMGCS1 HMGCS                | 520  |  |  | Secretion         | nonclassical secretion    | N | 0.56  | N |
| Q9Y4L1  | HYOU1 GRP170 ORP150         | 999  |  |  | Secretion         | classical secretion       | Y | 0.32  | Y |
| P22304  | IDS SIDS                    | 550  |  |  | Secretion         | classical secretion       | Y | 0.799 | N |
| Q14974  | KPNB1 NTF97                 | 876  |  |  | Secretion         | nonclassical secretion    | N | 0.588 | N |
| O95373  | IPO7 RANBP7                 | 1038 |  |  | Secretion         | nonclassical secretion    | N | 0.532 | N |
| Q13308  | PTK7 CCK4                   | 1070 |  |  | Secretion         | classical secretion       | Y | 0.391 | Y |
| Q15181  | PPA1 IOPPP PP               | 289  |  |  | Cytoplasmic       | others                    | N | 0.433 | N |
| Q9BY32  | PPA2 C20orf37 My049 OK/SW-c | 194  |  |  | Secretion         | nonclassical secretion    | N | 0.623 | N |

|        |                           |      |   |   |                   |                           |   |       |   |
|--------|---------------------------|------|---|---|-------------------|---------------------------|---|-------|---|
| P12268 | IMPDH2 IMPD2              | 514  |   |   | Multiple location | others                    | N | 0.354 | N |
| P18065 | IGFBP2 BP2 IBP2           | 325  | O | O | Secretion         | classical secretion       | Y | 0.886 | N |
| P17936 | IGFBP3 IBP3               | 291  | O |   | Secretion         | classical secretion       | Y | 0.815 | N |
| Q16270 | IGFBP7 MAC25 PSF          | 282  | O | O | Secretion         | classical secretion       | Y | 0.536 | N |
| P05556 | ITGB1 FNRB MDF2 MSK12     | 798  | O |   | Secretion         | classical secretion       | Y | 0.474 | Y |
| Q12905 | ILF2 NF45 PRO3063         | 390  | O | O | Multiple location | others                    | N | 0.272 | N |
| P10145 | CXCL8 IL8                 | 99   | O |   | Secretion         | classical secretion       | Y | 0.618 | Y |
| O75874 | IDH1 PICD                 | 414  | O | O | Secretion         | nonclassical secretion    | N | 0.547 | N |
| P13645 | KRT10 KPP                 | 584  | O |   | Cytoplasmic       | others                    | N | 0.123 | N |
| P13646 | KRT13                     | 458  | O |   | Cytoplasmic       | others                    | N | 0.345 | N |
| P08779 | KRT16 KRT16A              | 473  | O |   | Cytoplasmic       | others                    | N | 0.25  | N |
| P35527 | KRT9                      | 623  | O | O | Secretion         | others                    | N | 0.089 | N |
| P04264 | KRT1 KRTA                 | 644  | O | O | Membrane          | others                    | N | 0.099 | N |
| P19013 | KRT4 CYK4                 | 534  | O |   | Membrane          | membrane integral protein | N | 0.18  | Y |
| Q07666 | KHDRBS1 SAM68             | 443  | O |   | Multiple location | others                    | N | 0.387 | N |
| Q86UP2 | KTN1 CG1 KIAA0004         | 1357 |   | O | Organelar         | membrane integral protein | N | 0.101 | Y |
| Q04760 | GLO1                      | 184  | O | O | Multiple location | others                    | N | 0.397 | N |
| P20700 | LMNB1 LMN2 LMNB           | 586  | O |   | Nucleus           | others                    | N | 0.412 | N |
| Q16363 | LAMA4                     | 1823 | O |   | Secretion         | classical secretion       | Y | 0.399 | N |
| P07942 | LAMB1                     | 1786 | O |   | Secretion         | classical secretion       | Y | 0.352 | N |
| P55268 | LAMB2 LAMS                | 1798 | O |   | Secretion         | classical secretion       | Y | 0.261 | N |
| P11047 | LAMC1 LAMB2               | 1609 | O |   | Secretion         | classical secretion       | Y | 0.284 | N |
| Q8N2S1 | LTBP4                     | 1624 | O | O | Secretion         | classical secretion       | Y | 0.28  | N |
| P42704 | LRPPRC LRP130             | 1394 | O |   | Multiple location | others                    | N | 0.35  | N |
| Q96AG4 | LRRCS9 PRO1855            | 307  | O |   | Secretion         | nonclassical secretion    | N | 0.655 | Y |
| P09960 | LTA4H LTA4                | 611  | O | O | Cytoplasmic       | others                    | N | 0.485 | N |
| P00338 | LDHA PIG19                | 332  | O | O | Secretion         | nonclassical secretion    | N | 0.549 | N |
| P07195 | LDHB                      | 334  | O | O | Secretion         | nonclassical secretion    | N | 0.569 | N |
| P01130 | LDLR                      | 860  | O |   | Secretion         | classical secretion       | Y | 0.475 | Y |
| P51884 | LUM LDC SLRR2D            | 338  | O |   | Secretion         | classical secretion       | Y | 0.543 | N |
| P05455 | SSB                       | 408  | O | O | Nucleus           | others                    | N | 0.266 | N |
| P38571 | LIPA                      | 399  | O |   | Secretion         | classical secretion       | Y | 0.768 | N |
| P09603 | CSF1                      | 554  | O | O | Secretion         | classical secretion       | Y | 0.488 | Y |
| P40121 | CAPG AFCP MCP             | 348  | O |   | Secretion         | others                    | N | 0.439 | N |
| P40925 | MDH1 MDHA                 | 334  | O | O | Cytoplasmic       | others                    | N | 0.455 | N |
| P40926 | MDH2                      | 338  | O | O | Secretion         | nonclassical secretion    | N | 0.644 | N |
| P01033 | TIMP1 CLGI TIMP           | 207  | O | O | Secretion         | classical secretion       | Y | 0.765 | N |
| P16035 | TIMP2                     | 220  | O |   | Secretion         | classical secretion       | Y | 0.854 | N |
| Q9NZL9 | MSTP045 Nbla02999 UNQ2    | 334  | O | O | Secretion         | nonclassical secretion    | N | 0.519 | N |
| P56192 | MARS                      | 900  | O | O | Secretion         | nonclassical secretion    | N | 0.541 | N |
| P46821 | MAP1B                     | 2468 | O | O | Cytoplasmic       | others                    | N | 0.088 | N |
| P11137 | MAP2                      | 1827 | O |   | Cytoplasmic       | others                    | N | 0.188 | N |
| P27816 | MAP4                      | 1152 | O | O | Cytoplasmic       | others                    | N | 0.251 | N |
| Q15691 | MAPRE1                    | 268  | O | O | Multiple location | others                    | N | 0.356 | N |
| P21741 | MDK MK1 NEGF2             | 143  | O | O | Secretion         | classical secretion       | Y | 0.259 | Y |
| P28482 | WAPK1 ERK2 PRKM1 PRKM     | 360  | O | O | Multiple location | others                    | N | 0.352 | N |
| Q12851 | MAP4K2 GCK RAB8IP         | 820  | O | O | Multiple location | others                    | N | 0.343 | N |
| P26038 | MSN                       | 577  | O | O | Secretion         | nonclassical secretion    | N | 0.53  | N |
| Q969H8 | MYDGF C19orf10 IL25       | 173  | O |   | Secretion         | classical secretion       | Y | 0.906 | N |
| P60660 | MYL6                      | 151  | O |   | Multiple location | others                    | N | 0.427 | N |
| P19105 | MYL12A MLCB MRLC3 RLC     | 171  | O |   | Secretion         | nonclassical secretion    | N | 0.607 | N |
| P35580 | MYH10                     | 1976 | O |   | Cytoplasmic       | others                    | N | 0.069 | N |
| P58546 | MTPN                      | 118  | O | O | Multiple location | others                    | N | 0.325 | N |
| P29966 | MARCKS MACS PRKCSL        | 332  | O | O | Multiple location | others                    | N | 0.207 | N |
| Q94760 | DDAH1 DDAH                | 285  | O | O | Multiple location | others                    | N | 0.47  | N |
| Q9UJ70 | NAGK                      | 344  | O |   | Secretion         | nonclassical secretion    | N | 0.664 | N |
| Q8NCW5 | IAXE AIBP APOA1BP YJEFN   | 288  |   | O | Secretion         | classical secretion       | Y | 0.819 | N |
| P48163 | ME1                       | 572  | O |   | Cytoplasmic       | others                    | N | 0.378 | N |
| Q13765 | NACA HSD48                | 215  | O |   | Multiple location | others                    | N | 0.301 | N |
| Q8NQ53 | NECTIN3 PRR3 PVRL3        | 549  | O |   | Membrane          | membrane integral protein | N | 0.464 | Y |
| Q13564 | NAE1 APPBP1 HPP1          | 534  |   | O | Secretion         | nonclassical secretion    | N | 0.56  | N |
| P48681 | NES Nbla00170             | 1621 | O | O | Cytoplasmic       | others                    | N | 0.256 | N |
| O14594 | NCAN CSPG3 NEUR           | 1321 | O | O | Secretion         | classical secretion       | Y | 0.21  | N |
| P29120 | PCSK1 NEC1                | 753  | O |   | Secretion         | classical secretion       | Y | 0.366 | N |
| Q9BYT8 | NLN AGTBP KIAA1226        | 704  | O |   | Cytoplasmic       | others                    | N | 0.45  | N |
| P17677 | GAP43                     | 238  | O | O | Membrane          | others                    | N | 0.412 | N |
| Q92823 | NRCAM KIAA0343            | 1304 | O | O | Secretion         | classical secretion       | Y | 0.332 | Y |
| Q15818 | NPTX1                     | 432  | O |   | Secretion         | classical secretion       | Y | 0.6   | N |
| Q14697 | GANAB G2AN KIAA0088       | 944  | O | O | Secretion         | classical secretion       | Y | 0.64  | Y |
| P43490 | NAMPT PBEF PBEF1          | 491  | O | O | Secretion         | others                    | N | 0.302 | N |
| P14543 | NID1 NID                  | 1247 | O |   | Secretion         | classical secretion       | Y | 0.644 | N |
| Q14112 | NID2                      | 1375 | O |   | Secretion         | classical secretion       | Y | 0.558 | N |
| Q9UNZ2 | NSFL1C UBXN2C             | 370  |   | O | Multiple location | others                    | N | 0.359 | N |
| P49321 | NASP                      | 788  | O | O | Multiple location | others                    | N | 0.089 | N |
| Q9Y266 | NIJDC                     | 331  | O | O | Multiple location | others                    | N | 0.448 | N |
| P61970 | NUTF2 NTF2                | 127  | O | O | Secretion         | nonclassical secretion    | N | 0.625 | N |
| P67809 | YBX1 NSEP1 YB1            | 324  | O | O | Secretion         | nonclassical secretion    | N | 0.733 | N |
| Q02818 | NUCB1 NUC                 | 461  | O | O | Secretion         | classical secretion       | Y | 0.305 | N |
| P19338 | NCL                       | 710  | O |   | Nucleus           | others                    | N | 0.386 | N |
| Q6NW34 | NEPRO C3orf17             | 567  |   | O | Secretion         | nonclassical secretion    | N | 0.866 | N |
| P06748 | NPM1 NPM                  | 294  | O | O | Secretion         | nonclassical secretion    | N | 0.811 | N |
| P22392 | NME2 NM23B                | 152  | O |   | Multiple location | others                    | N | 0.33  | N |
| P55209 | NAP1L1 NRP                | 391  | O |   | Multiple location | others                    | N | 0.042 | N |
| Q9NQ84 | NIT2 CUA002               | 276  | O |   | Secretion         | nonclassical secretion    | N | 0.663 | N |
| P10451 | SPP1 BNSP OPN PSEC015f    | 314  | O |   | Secretion         | classical secretion       | Y | 0.656 | N |
| P50897 | PPT1 CLN1 PPT             | 306  | O |   | Secretion         | classical secretion       | Y | 0.84  | N |
| Q96RD6 | PANX2                     | 677  | O |   | Secretion         | nonclassical secretion    | N | 0.544 | Y |
| P62937 | PPIA CYPB                 | 165  | O | O | Secretion         | others                    | N | 0.339 | N |
| P23284 | PPIB CYPB                 | 216  | O | O | Secretion         | nonclassical secretion    | N | 0.853 | Y |
| P30405 | PIIF CYP3                 | 207  | O |   | Secretion         | nonclassical secretion    | N | 0.683 | N |
| P62942 | FKBP1A FKBP1 FKBP12       | 108  | O | O | Cytoplasmic       | others                    | N | 0.368 | N |
| Q02790 | FKBP4 FKBP52              | 459  | O | O | Multiple location | others                    | N | 0.287 | N |
| Q06664 | PLIN3 M6PRBP1 TIP47       | 434  | O |   | Secretion         | nonclassical secretion    | N | 0.559 | N |
| Q06830 | PRDX1 PAGA PAGB TDPX2     | 199  | O | O | Secretion         | nonclassical secretion    | N | 0.528 | N |
| P32119 | PRDX2 NKEFB TDPX1         | 198  | O | O | Secretion         | nonclassical secretion    | N | 0.522 | N |
| P30041 | PRDX6 AOP2 KIAA0106       | 224  | O | O | Secretion         | others                    | N | 0.378 | N |
| P30086 | PEBP1 PBP PEBP            | 187  | O | O | Secretion         | nonclassical secretion    | N | 0.672 | N |
| P42336 | PIK3CA                    | 1068 | O |   | Cytoplasmic       | others                    | N | 0.414 | N |
| P36871 | PGM1                      | 562  | O | O | Cytoplasmic       | others                    | N | 0.417 | N |
| P00558 | iK1 PGKA MIG10 OK/SW-cl.  | 417  | O | O | Cytoplasmic       | others                    | N | 0.389 | N |
| P07205 | PGK2 PGKB                 | 417  | O |   | Cytoplasmic       | others                    | N | 0.361 | N |
| P18669 | PGAM1 PGAMA CDABP000f     | 254  | O | O | Nucleus           | others                    | N | 0.407 | N |
| Q9Y617 | PSAT1 PSA                 | 370  | O |   | Cytoplasmic       | others                    | N | 0.384 | N |
| P38955 | SERPINF1 PEDF PIG35       | 418  |   | O | Secretion         | classical secretion       | Y | 0.825 | N |
| Q9GZP4 | D1 C1orf128 AD039 HT014 F | 211  |   | O | Secretion         | nonclassical secretion    | N | 0.68  | N |

|        |                           |      |   |   |   |                   |                           |   |       |   |
|--------|---------------------------|------|---|---|---|-------------------|---------------------------|---|-------|---|
| Q98TY2 | :A2 PSEC0151 UNQ227/PRC   | 467  |   |   | O | Secretion         | classical secretion       | Y | 0.779 | N |
| P13797 | PLS3                      | 630  | O |   |   | Cytoplasmic       | others                    | N | 0.429 | N |
| P43034 | 4H1B1 LIS1 MDCR MDS PAF   | 410  | O | O |   | Multiple location | others                    | N | 0.356 | N |
| P68402 | PAFAH1B2 PAFAHB           | 229  | O |   |   | Cytoplasmic       | others                    | N | 0.47  | N |
| Q15365 | PCBP1                     | 356  | O | O |   | Secretion         | nonclassical secretion    | N | 0.549 | N |
| P11940 | ABPC1 PAB1 PABP1 PABPC    | 636  | O |   |   | Multiple location | others                    | N | 0.283 | N |
| Q13310 | PABPC4 APP1 PABP4         | 644  |   |   | O | Cytoplasmic       | others                    | N | 0.151 | N |
| P26599 | PTBP1 PTB                 | 531  | O |   |   | Nucleus           | others                    | N | 0.415 | N |
| P0CG48 | UBC                       | 685  | O |   |   | Multiple location | others                    | N | 0.337 | N |
| P0CG39 | POTEJ                     | 1038 | O |   |   | Secretion         | others                    | N | 0.355 | N |
| Q9UHV9 | PFDN2 PFD2 HSPC231        | 154  |   |   | O | Secretion         | nonclassical secretion    | N | 0.583 | N |
| Q99471 | PFDN5 MM1 PFD5            | 154  | O | O |   | Nucleus           | others                    | N | 0.296 | N |
| P02545 | LMNA LMN1                 | 664  | O | O |   | Nucleus           | others                    | N | 0.077 | N |
| Q15113 | PCOLCE PCPE1              | 449  | O |   |   | Secretion         | classical secretion       | Y | 0.699 | N |
| Q02809 | PLOD1 LLH PLOD            | 727  | O | O |   | Secretion         | classical secretion       | Y | 0.573 | N |
| O00469 | PLOD2                     | 737  | O |   |   | Secretion         | classical secretion       | Y | 0.634 | N |
| O60568 | PLOD3                     | 738  | O | O |   | Secretion         | classical secretion       | Y | 0.561 | N |
| P07737 | PFN1                      | 140  | O | O |   | Cytoplasmic       | others                    | N | 0.469 | N |
| P35080 | PFN2                      | 140  | O | O |   | Secretion         | nonclassical secretion    | N | 0.552 | N |
| P12004 | PCNA                      | 261  | O | O |   | Secretion         | nonclassical secretion    | N | 0.566 | N |
| Q9UQ80 | PA2G4 EBP1                | 394  | O | O |   | Multiple location | others                    | N | 0.201 | N |
| Q32P28 | H1 GROS1 LEPRE1 PSEC0     | 736  | O |   |   | Secretion         | classical secretion       | Y | 0.805 | N |
| P48147 | PREP PEP                  | 710  | O |   |   | Secretion         | nonclassical secretion    | N | 0.543 | N |
| P07602 | PSAP GLBA SAP1            | 524  | O |   |   | Secretion         | classical secretion       | Y | 0.785 | N |
| Q15185 | PTGES3 P23 TEBP           | 160  |   |   | O | Secretion         | nonclassical secretion    | N | 0.729 | N |
| Q14914 | PTGR1 LTB4DH              | 329  | O |   |   | Cytoplasmic       | others                    | N | 0.367 | N |
| P41222 | PTGDS PDS                 | 190  | O | O |   | Secretion         | classical secretion       | Y | 0.772 | N |
| Q9UL46 | PSME2                     | 239  | O |   |   | Nucleus           | others                    | N | 0.363 | N |
| Q98T73 | PSMG3 C7orf48 PAC3        | 122  |   |   | O | Secretion         | nonclassical secretion    | N | 0.593 | N |
| P25787 | PSMA2 HC3 PSC3            | 234  | O | O |   | Multiple location | others                    | N | 0.33  | N |
| P25788 | PSMA3 HC8 PSC8            | 255  | O |   |   | Multiple location | others                    | N | 0.256 | N |
| P25789 | PSMA4 HC9 PSC9            | 261  | O | O |   | Multiple location | others                    | N | 0.209 | N |
| P28066 | PSMA5                     | 241  | O | O |   | Multiple location | others                    | N | 0.485 | N |
| Q14818 | PSMA7 HSPC                | 248  | O | O |   | Multiple location | others                    | N | 0.248 | N |
| P20618 | PSMB1 PSC5                | 241  | O | O |   | Multiple location | others                    | N | 0.473 | N |
| P40306 | PSMB10 LMP10 MECL1        | 273  | O | O |   | Secretion         | nonclassical secretion    | N | 0.515 | N |
| P49721 | PSMB2                     | 201  | O | O |   | Multiple location | others                    | N | 0.398 | N |
| P49720 | PSMB3                     | 205  | O | O |   | Multiple location | others                    | N | 0.401 | N |
| P28070 | PSMB4 PROS26              | 264  | O |   |   | Secretion         | nonclassical secretion    | N | 0.565 | N |
| P28072 | PSMB6 LMPY Y              | 239  | O |   |   | Secretion         | nonclassical secretion    | N | 0.563 | N |
| P28062 | PSMB7 LMP7 PSMB5 RING10   | 276  | O |   |   | Secretion         | nonclassical secretion    | N | 0.517 | N |
| P28065 | PSMB9 LMP2 PSMB6 RING1    | 219  | O | O |   | Secretion         | nonclassical secretion    | N | 0.557 | N |
| Q9UKY7 | CDV3 H41                  | 258  | O |   |   | Cytoplasmic       | others                    | N | 0.441 | N |
| Q99497 | PARK7                     | 189  | O | O |   | Membrane          | others                    | N | 0.493 | N |
| P30101 | PDIA3 ERP57 ERP60 GRP57   | 505  | O |   |   | Secretion         | classical secretion       | Y | 0.707 | N |
| P13667 | PDIA4 ERP70 ERP72         | 645  | O | O |   | Secretion         | classical secretion       | Y | 0.543 | Y |
| Q15084 | PDIA6 ERP5 P5 TXNDC7      | 440  | O |   |   | Secretion         | classical secretion       | Y | 0.711 | N |
| P07237 | HB ERBA2L PDI PDIA1 PO4   | 508  | O | O |   | Secretion         | classical secretion       | Y | 0.679 | N |
| P49257 | LMAN1 ERGIC53 F5F8D       | 510  | O | O |   | Secretion         | classical secretion       | Y | 0.589 | Y |
| Q92520 | FAM3C ILEI GS3786         | 227  | O | O |   | Secretion         | nonclassical secretion    | N | 0.821 | Y |
| P49354 | FNTA                      | 379  | O |   |   | Cytoplasmic       | others                    | N | 0.401 | N |
| P78504 | JAG1 JAGL1                | 1218 | O | O |   | Secretion         | classical secretion       | Y | 0.306 | Y |
| P48745 | NOV CCN3 IGFBP9 NOVH      | 357  | O |   |   | Secretion         | classical secretion       | Y | 0.888 | N |
| Q96C90 | PPP1R14B PLCB3N PNG       | 147  | O |   |   | Secretion         | nonclassical secretion    | N | 0.763 | N |
| Q15435 | PPP1R7 SDS22              | 360  | O |   |   | Secretion         | nonclassical secretion    | N | 0.777 | N |
| Q9P258 | RCC2 KIAA1470 TD60        | 522  | O | O |   | Multiple location | others                    | N | 0.343 | N |
| P60903 | I00A10 ANX2LG CAL1L CLP   | 97   | O |   |   | Membrane          | membrane integral protein | N | 0.121 | Y |
| Q15436 | SEC23A                    | 765  | O |   |   | Secretion         | nonclassical secretion    | N | 0.612 | N |
| Q94855 | SEC24D KIAA0755           | 1032 | O |   |   | Secretion         | nonclassical secretion    | N | 0.545 | N |
| Q9H993 | ARMT1 C6orf211            | 441  | O | O |   | Secretion         | nonclassical secretion    | N | 0.557 | N |
| Q96JQ0 | DH19 CDH25 FIB1 KIAA177   | 3298 | O |   |   | Secretion         | classical secretion       | Y | 0.448 | Y |
| P61457 | PCBD1 DCOH PCBD           | 104  |   |   |   | Multiple location | others                    | N | 0.461 | N |
| P00491 | PNP NP                    | 289  | O | O |   | Secretion         | nonclassical secretion    | N | 0.509 | N |
| A6NMV6 | XA2P2 ANX2L2 ANX2P2 LPI   | 339  | O | O |   | Secretion         | nonclassical secretion    | N | 0.732 | N |
| B2RPK0 | HMG1P1 HMG1L1 HMG1L       | 211  | O | O |   | Nucleus           | others                    | N | 0.048 | N |
| O60361 | NME2P1                    | 137  | O |   |   | Secretion         | nonclassical secretion    | N | 0.578 | N |
| O00764 | Z1orf124 C21orf97 PKH PNK | 312  | O |   |   | Secretion         | nonclassical secretion    | N | 0.511 | N |
| Q96GD0 | PDXP CIN PLP PLPP         | 296  |   |   | O | Cytoplasmic       | others                    | N | 0.451 | N |
| Q9NV59 | PNPO                      | 261  | O |   |   | Secretion         | nonclassical secretion    | N | 0.722 | N |
| P14618 | PKM OIP3 PK2 PK3 PKM2     | 531  | O | O |   | Multiple location | others                    | N | 0.42  | N |
| P31150 | I1 GDIL OPHN2 RABGDIA X   | 447  | O | O |   | Cytoplasmic       | others                    | N | 0.429 | N |
| P50395 | GDIL2 RABGDIB             | 445  | O | O |   | Multiple location | others                    | N | 0.315 | N |
| P35241 | RDX                       | 583  | O | O |   | Membrane          | others                    | N | 0.31  | N |
| Q9UN86 | G3BP2 KIAA0660            | 482  | O |   |   | Cytoplasmic       | others                    | N | 0.221 | N |
| P46940 | IQGAP1 KIAA0051           | 1657 | O | O |   | Membrane          | others                    | N | 0.24  | N |
| P63244 | RACK1 GNB2L1 HLC7 PIG2    | 317  | O |   |   | Membrane          | others                    | N | 0.465 | N |
| P10586 | PTPRF LAR                 | 1907 | O | O |   | Secretion         | classical secretion       | Y | 0.419 | Y |
| P23470 | PTPRG PTPG                | 1445 | O |   |   | Membrane          | membrane integral protein | N | 0.152 | Y |
| Q15262 | PTPRK PTPK                | 1439 | O | O |   | Secretion         | classical secretion       | Y | 0.36  | Y |
| P23471 | Z1 HTPZP2 PTPRZ PTPRZ2    | 2315 |   |   | O | Secretion         | classical secretion       | Y | 0.404 | Y |
| P35244 | RPA3 REPA3 RPA14          | 121  | O | O |   | Nucleus           | others                    | N | 0.351 | N |
| Q15293 | RCN1 RCN                  | 331  | O | O |   | Secretion         | classical secretion       | Y | 0.851 | N |
| Q9NQ33 | I KIAA0886 NOGO My043 SF  | 1192 |   |   |   | Membrane          | membrane integral protein | N | 0.23  | Y |
| P02753 | RBP4 PRO2222              | 201  | O |   |   | Secretion         | classical secretion       | Y | 0.858 | N |
| P52565 | ARHGDI1A GDIA1            | 204  | O | O |   | Cytoplasmic       | others                    | N | 0.43  | N |
| P13489 | RNH1 PRI RNH              | 461  | O | O |   | Secretion         | nonclassical secretion    | N | 0.568 | N |
| P11908 | PRPS2                     | 318  | O |   |   | Secretion         | others                    | N | 0.489 | N |
| Q9GZL7 | WDR12                     | 423  | O | O |   | Secretion         | nonclassical secretion    | N | 0.58  | N |
| P16083 | NQO2 NMOR2                | 231  | O |   |   | Cytoplasmic       | others                    | N | 0.366 | N |
| Q96AT9 | RPE HUSSY-17              | 228  | O | O |   | Secretion         | nonclassical secretion    | N | 0.547 | N |
| P98179 | RBM3 RNPL                 | 157  | O |   |   | Secretion         | nonclassical secretion    | N | 0.845 | N |
| Q9Y230 | 3L2 INO80J TIP48 TIP49B C | 463  |   |   | O | Multiple location | others                    | N | 0.344 | N |
| P31153 | MAT2A AMS2 MATA2          | 395  |   |   | O | Secretion         | nonclassical secretion    | N | 0.552 | N |
| Q12765 | SCRN1 KIAA0193            | 414  | O |   |   | Secretion         | nonclassical secretion    | N | 0.519 | N |
| Q9UJH6 | SHPK CARKL                | 478  | O | O |   | Secretion         | nonclassical secretion    | N | 0.68  | N |
| P49903 | SEPHS1 SELD SPS SPS1      | 392  | O |   |   | Secretion         | nonclassical secretion    | N | 0.535 | N |
| Q9NVA2 | SEPT11                    | 429  | O |   |   | Cytoplasmic       | others                    | N | 0.069 | N |
| Q15019 | EPT2 DIF6 KIAA0158 NEDC   | 361  | O | O |   | Multiple location | others                    | N | 0.129 | N |
| Q16181 | SEPT7 CDC10               | 437  | O | O |   | Multiple location | others                    | N | 0.379 | N |
| P84103 | SRSF3 SFRS3 SRP20         | 164  |   |   |   | Multiple location | others                    | N | 0.427 | N |
| P30153 | PPP2R1A                   | 589  | O | O |   | Secretion         | nonclassical secretion    | N | 0.562 | N |
| Q15257 | PPP2R4 PTPA               | 358  | O |   |   | Secretion         | nonclassical secretion    | N | 0.54  | N |
| P62714 | PPP2CB                    | 309  | O | O |   | Multiple location | others                    | N | 0.442 | N |
| P53041 | PPPS5 PPP5                | 499  | O |   |   | Multiple location | others                    | N | 0.287 | N |
| O00743 | PPPC6 PPP6                | 305  | O |   |   | Cytoplasmic       | others                    | N | 0.497 | N |

|        |                          |      |   |   |                   |                           |   |       |   |
|--------|--------------------------|------|---|---|-------------------|---------------------------|---|-------|---|
| P36873 | PPP1CC                   | 323  | O |   | Multiple location | others                    | N | 0.48  | N |
| P49591 | SARS SERS                | 514  |   | O | Cytoplasmic       | others                    | N | 0.229 | N |
| P02787 | TF PRO1400               | 698  | O | O | Secretion         | classical secretion       | Y | 0.478 | N |
| P35237 | SERPINB6 P16 PTI         | 376  | O | O | Cytoplasmic       | others                    | N | 0.44  | N |
| P50454 | CBP1 CBP2 HSP47 SERP11   | 418  |   | O | Secretion         | classical secretion       | Y | 0.864 | N |
| P02768 | PRO1708 PRO2044 PRO2611  | 609  | O | O | Secretion         | classical secretion       | Y | 0.467 | N |
| P10768 | ESD                      | 282  | O | O | Secretion         | nonclassical secretion    | N | 0.57  | N |
| P55822 | SH3BGR                   | 239  |   | O | Multiple location | others                    | N | 0.22  | N |
| O75368 | SH3BGR                   | 114  | O |   | Secretion         | nonclassical secretion    | N | 0.758 | N |
| Q9HAT2 | SIAE YSG2                | 523  | O |   | Secretion         | classical secretion       | Y | 0.786 | N |
| P40763 | STAT3 APRF               | 770  | O |   | Secretion         | nonclassical secretion    | N | 0.521 | N |
| Q04837 | SSBP1 SSBP               | 148  | O |   | Secretion         | nonclassical secretion    | N | 0.85  | N |
| P62314 | SNRPD1                   | 119  |   | O | Multiple location | others                    | N | 0.391 | N |
| P62318 | SNRPD3                   | 126  |   | O | Secretion         | nonclassical secretion    | N | 0.763 | N |
| Q13126 | MTAP MSAP                | 283  |   |   | Multiple location | others                    | N | 0.458 | N |
| P55011 | SLC12A2 NKCC1            | 1212 | O |   | Secretion         | nonclassical secretion    | N | 0.625 | Y |
| P30626 | SRI                      | 198  | O | O | Secretion         | nonclassical secretion    | N | 0.912 | N |
| Q92673 | SORL1 C11orf32           | 2214 | O |   | Secretion         | classical secretion       | Y | 0.534 | Y |
| P09486 | SPARC ON                 | 303  | O |   | Secretion         | classical secretion       | Y | 0.942 | N |
| Q14515 | SPARCL1                  | 664  |   | O | Secretion         | classical secretion       | Y | 0.378 | N |
| Q13813 | SPTAN1 NEAS SPTA2        | 2472 | O | O | Cytoplasmic       | others                    | N | 0.237 | N |
| Q01082 | SPTBN1 SPTB2             | 2364 | O | O | Cytoplasmic       | others                    | N | 0.177 | N |
| P63208 | EMC19 OCP2 SKP1A TCE     | 163  | O |   | Secretion         | nonclassical secretion    | N | 0.648 | N |
| Q9BWJ5 | SF3B5 SF3B10             | 86   |   |   | Secretion         | nonclassical secretion    | N | 0.624 | N |
| P23246 | SFPQ PSF                 | 707  | O |   | Multiple location | others                    | N | 0.318 | N |
| P52823 | STC1 STC                 | 247  | O |   | Secretion         | classical secretion       | Y | 0.911 | N |
| P31948 | STIP1                    | 543  | O | O | Multiple location | others                    | N | 0.344 | N |
| Q15772 | SPEG APEG1 KIAA1297      | 3267 | O |   | Nucleus           | others                    | N | 0.315 | N |
| P48061 | CXCL12 SDF1 SDF1A SDF1   | 93   | O |   | Secretion         | classical secretion       | Y | 0.851 | N |
| P31040 | SDHA SDH2 SDHF           | 664  |   | O | Membrane          | others                    | N | 0.478 | N |
| P55809 | OXCT1 OXCT SCOT          | 520  | O | O | Secretion         | classical secretion       | Y | 0.496 | N |
| O00391 | QSCN6 UNQ2520/PRO        | 747  | O |   | Secretion         | classical secretion       | Y | 0.611 | Y |
| P63279 | UBE2B UBCE9 UBCE9        | 158  |   | O | Secretion         | nonclassical secretion    | N | 0.749 | N |
| P00441 | SOD1                     | 154  | O | O | Secretion         | nonclassical secretion    | N | 0.648 | N |
| P04179 | SOD2                     | 222  | O |   | Secretion         | nonclassical secretion    | N | 0.535 | N |
| O60687 | SRPX2 SRPUL              | 465  | O |   | Secretion         | classical secretion       | Y | 0.575 | N |
| Q9Y490 | TLN1 KIAA1027 TLN        | 2541 | O | O | Membrane          | others                    | N | 0.233 | N |
| P17987 | TCP1 CCT1 CCTA           | 556  | O | O | Secretion         | nonclassical secretion    | N | 0.518 | N |
| P78371 | CCT2 99D8.1 CCTB         | 535  |   | O | Cytoplasmic       | others                    | N | 0.446 | N |
| P48643 | CCT5 CCTE KIAA0098       | 541  | O | O | Cytoplasmic       | others                    | N | 0.425 | N |
| Q99832 | CCT7 CETH NIP7-1         | 543  |   | O | Cytoplasmic       | others                    | N | 0.382 | N |
| P50990 | C21orf112 CCTQ KIAA0     | 548  |   | O | Secretion         | nonclassical secretion    | N | 0.508 | N |
| P24821 | TNC HXB                  | 2201 | O |   | Secretion         | classical secretion       | Y | 0.468 | Y |
| Q9NT68 | ENM2 KIAA1127 ODZ2 TNM   | 2774 | O |   | Membrane          | membrane integral protein | N | 0.466 | Y |
| P52888 | THOP1                    | 689  |   | O | Cytoplasmic       | others                    | N | 0.374 | N |
| Q9BRA2 | TXNDC17 TXNL5            | 123  | O |   | Cytoplasmic       | others                    | N | 0.491 | N |
| Q16881 | TXNRD1 GRIM12 KDRF       | 649  | O | O | Multiple location | others                    | N | 0.359 | N |
| P30048 | PRDX3 AOP1               | 256  | O |   | Secretion         | nonclassical secretion    | N | 0.756 | N |
| P26639 | TARS                     | 723  | O | O | Cytoplasmic       | others                    | N | 0.337 | N |
| P35442 | THBS2 TSP2               | 1172 | O | O | Secretion         | classical secretion       | Y | 0.526 | N |
| P20062 | TCN2 TC2                 | 427  | O |   | Secretion         | classical secretion       | Y | 0.764 | N |
| P20290 | BTF3 NACB OK/SW-cl.8     | 206  | O |   | Multiple location | others                    | N | 0.254 | N |
| P02786 | TFRC                     | 760  | O |   | Secretion         | nonclassical secretion    | N | 0.611 | Y |
| Q15582 | TGFB1 BIGH3              | 683  | O |   | Secretion         | classical secretion       | Y | 0.454 | Y |
| P37802 | AGLN2 KIAA0120 CDABP00   | 199  | O | O | Secretion         | nonclassical secretion    | N | 0.784 | N |
| P55072 | VCP                      | 806  | O | O | Multiple location | others                    | N | 0.163 | N |
| P29401 | TKT                      | 623  | O | O | Nucleus           | others                    | N | 0.315 | N |
| P13693 | TPT1                     | 172  | O | O | Secretion         | nonclassical secretion    | N | 0.581 | N |
| Q15631 | TSN                      | 228  | O | O | Multiple location | others                    | N | 0.229 | N |
| Q99598 | TSNAX TRAX               | 290  | O |   | Cytoplasmic       | others                    | N | 0.419 | N |
| P22102 | GART PGFT PRGS           | 1010 |   | O | Secretion         | nonclassical secretion    | N | 0.526 | N |
| P60174 | TP1 TP1                  | 286  | O | O | Secretion         | nonclassical secretion    | N | 0.51  | N |
| O14773 | CLN2 GIG1 UNQ267/PRO     | 563  | O | O | Secretion         | classical secretion       | Y | 0.746 | N |
| P29144 | TPP2                     | 1249 | O |   | Multiple location | others                    | N | 0.413 | N |
| P06753 | TPM3                     | 285  | O |   | Secretion         | nonclassical secretion    | N | 0.533 | N |
| P67936 | TPM4                     | 248  | O |   | Cytoplasmic       | others                    | N | 0.417 | N |
| Q71U36 | TUBA1A TUBA3             | 451  |   | O | Cytoplasmic       | others                    | N | 0.469 | N |
| P68363 | TUBA1B                   | 451  |   | O | Cytoplasmic       | others                    | N | 0.472 | N |
| Q9BQE3 | TUBA1C TUBA6             | 449  | O |   | Cytoplasmic       | others                    | N | 0.481 | N |
| P07437 | TUBB TUBB5 OK/SW-cl.56   | 444  | O |   | Cytoplasmic       | others                    | N | 0.494 | N |
| Q9BVA1 | TUBB2B                   | 445  |   | O | Secretion         | nonclassical secretion    | N | 0.527 | N |
| P68371 | TUBB4B TUBB2C            | 445  | O | O | Secretion         | nonclassical secretion    | N | 0.501 | N |
| Q9BUF5 | TUBB6                    | 446  |   | O | Secretion         | nonclassical secretion    | N | 0.544 | N |
| Q3ZCM7 | TUBB8                    | 444  | O |   | Cytoplasmic       | others                    | N | 0.473 | N |
| O75347 | TBCA                     | 108  | O |   | Cytoplasmic       | others                    | N | 0.455 | N |
| P55327 | TPD52                    | 224  |   | O | Secretion         | nonclassical secretion    | N | 0.575 | N |
| Q6IBS0 | TWF2 PTK9L MSTP011       | 349  | O |   | Cytoplasmic       | others                    | N | 0.418 | N |
| O15116 | LSM1 CASM                | 133  |   | O | Nucleus           | others                    | N | 0.358 | N |
| Q9Y333 | LSM2 C6orf28 G7B         | 95   |   | O | Secretion         | nonclassical secretion    | N | 0.597 | N |
| O95777 | LSM8                     | 96   | O |   | Secretion         | nonclassical secretion    | N | 0.532 | N |
| Q96DE0 | NUDT16                   | 195  | O |   | Nucleus           | others                    | N | 0.445 | N |
| Q9UMX0 | UBQLN1 DA41 PLIC1        | 589  | O |   | Secretion         | others                    | N | 0.402 | N |
| P09936 | UCHL1                    | 223  | O | O | Secretion         | nonclassical secretion    | N | 0.53  | N |
| P62979 | RPS27A UBA80 UBCEP1      | 156  |   | O | Secretion         | nonclassical secretion    | N | 0.88  | N |
| P51668 | SFT UBC5A UBCH5 UBE1     | 147  | O |   | Secretion         | nonclassical secretion    | N | 0.901 | N |
| P68036 | UBE2L3 UBCE7 UBCH7       | 154  | O | O | Secretion         | nonclassical secretion    | N | 0.582 | N |
| P61960 | UFM1 C13orf20 BM-002     | 85   | O |   | Multiple location | others                    | N | 0.484 | N |
| P22314 | UBA1 A1S9T UBE1          | 1058 | O | O | Secretion         | nonclassical secretion    | N | 0.53  | N |
| Q16222 | UAP1 SPAG2               | 522  |   | O | Secretion         | nonclassical secretion    | N | 0.526 | N |
| A6NCD4 | C10orf131                | 256  | O |   | Secretion         | nonclassical secretion    | N | 0.703 | N |
| Q9NWW4 | C1orf123                 | 160  |   | O | Cytoplasmic       | others                    | N | 0.332 | N |
| P06132 | UROD                     | 367  | O |   | Secretion         | nonclassical secretion    | N | 0.588 | N |
| Q16851 | UGP2 UGP1                | 508  | O |   | Cytoplasmic       | others                    | N | 0.34  | N |
| P54727 | RAD23B                   | 409  | O |   | Multiple location | others                    | N | 0.148 | N |
| O75436 | VPS26A VPS26             | 327  | O |   | Cytoplasmic       | others                    | N | 0.432 | N |
| Q9NP79 | TA1 C6orf55 HSPC228 My01 | 307  | O |   | Cytoplasmic       | others                    | N | 0.456 | N |
| Q86WA6 | BPHL MCNAA               | 291  |   | O | Secretion         | classical secretion       | Y | 0.85  | N |
| P19320 | VCAM1 L1CAM              | 739  | O |   | Secretion         | classical secretion       | Y | 0.605 | Y |
| Q6EMK4 | SLITL2 UNQ314/PRO357/PR  | 673  | O |   | Secretion         | classical secretion       | Y | 0.216 | Y |
| P13611 | VCAN CSPG2               | 3396 | O |   | Secretion         | classical secretion       | Y | 0.46  | N |
| P08670 | VIM                      | 466  | O | O | Secretion         | nonclassical secretion    | N | 0.512 | N |
| P18206 | VCL                      | 1134 | O |   | Membrane          | others                    | N | 0.181 | N |
| P07225 | PROS1 PROS               | 676  |   | O | Secretion         | classical secretion       | Y | 0.5   | N |
| Q9UUP3 | SORCS3 KIAA1059          | 1222 | O |   | Secretion         | classical secretion       | Y | 0.307 | Y |
| Q15904 | P1 ATP6IP1 ATP6S1 VATPS  | 470  | O |   | Secretion         | classical secretion       | Y | 0.637 | Y |

|        |                        |     |   |   |           |                        |   |       |   |
|--------|------------------------|-----|---|---|-----------|------------------------|---|-------|---|
| O75083 | WDR1                   | 606 | O | O | Secretion | nonclassical secretion | N | 0.518 | N |
| Q6UXN9 | MEM113 WDR82A UNQ9342/ | 313 |   | O | Nucleus   | others                 | N | 0.463 | N |
| P12955 | PEPD PRD               | 493 |   | O | Nucleus   | others                 | N | 0.479 | N |
| P13010 | XRCC5 G22P2            | 732 | O |   | Nucleus   | others                 | N | 0.447 | N |
| P12956 | XRCC6 G22P1            | 609 |   | O | Nucleus   | others                 | N | 0.372 | N |
| P16989 | YBX3 CSDA DBPA         | 372 | O |   | Secretion | nonclassical secretion | N | 0.615 | N |
| Q15942 | ZYX                    | 572 |   | O | Secretion | nonclassical secretion | N | 0.528 | N |

**Supplementary Table 3.** The mRNA expression of MDK (RSEM z-score) and overall survival (OS, months) in TCGA GBM dataset used in Fig. 1d

| <b>SAMPLE_ID</b> | <b>MDK_expr(RSEM zscore)</b> | <b>OS(month)</b> |
|------------------|------------------------------|------------------|
| TCGA-02-0047-01  | -1.0325                      | 14.72            |
| TCGA-02-0055-01  | -0.336                       | 2.5              |
| TCGA-06-0878-01  | 0.3344                       | 7.16             |
| TCGA-06-0882-01  | 0.0147                       | 20.76            |
| TCGA-12-0821-01  | 1.5148                       | 10.61            |
| TCGA-14-0787-01  | 0.824                        | 2.23             |
| TCGA-14-0789-01  | -1.0108                      | 11.24            |
| TCGA-14-0817-01  | -0.2958                      | 5.39             |
| TCGA-16-0846-01  | -0.6494                      | 3.91             |
| TCGA-06-1804-01  | -0.991                       | 13.6             |
| TCGA-06-5408-01  | 0.019                        | 11.73            |
| TCGA-06-5410-01  | -0.385                       | 3.55             |
| TCGA-06-5411-01  | -0.609                       | 8.34             |
| TCGA-06-5412-01  | -0.2524                      | 4.53             |
| TCGA-06-5413-01  | -0.5189                      | 8.8              |
| TCGA-06-5856-01  | -1.0857                      | 3.75             |
| TCGA-06-5858-01  | -0.9553                      | 6.14             |
| TCGA-06-5859-01  | -0.965                       | 4.57             |
| TCGA-14-0781-01  | -0.2287                      | 0.95             |
| TCGA-19-5960-01  | -0.9613                      | 14.95            |
| TCGA-32-1980-01  | -0.8769                      | 1.18             |
| TCGA-41-5651-01  | -0.9772                      | 15.11            |
| TCGA-16-1045-01  | -1.1065                      | 29.01            |
| TCGA-14-1823-01  | -1.2432                      | 17.84            |
| TCGA-14-1825-01  | -0.2762                      | 7.62             |
| TCGA-14-1829-01  | -0.3664                      | 7.16             |
| TCGA-27-1830-01  | -0.8387                      | 5.06             |
| TCGA-27-1832-01  | 2.5636                       | 9.86             |
| TCGA-27-1834-01  | -0.9305                      | 40.51            |
| TCGA-02-2485-01  | 0.0438                       | 15.44            |
| TCGA-02-2486-01  | 0.4047                       | 20.3             |
| TCGA-06-2557-01  | -0.2306                      | 1.08             |
| TCGA-06-2558-01  | -0.9616                      | 12.48            |
| TCGA-06-2559-01  | 0.0442                       | 4.93             |
| TCGA-06-2561-01  | -0.5081                      | 17.64            |
| TCGA-06-2562-01  | 0.1315                       | 12.55            |
| TCGA-06-2563-01  | 0.3608                       | 30.62            |
| TCGA-06-2564-01  | -0.0305                      | 5.95             |
| TCGA-06-2565-01  | -0.4843                      | 16.62            |

|                 |         |       |
|-----------------|---------|-------|
| TCGA-06-2567-01 | -0.2715 | 4.37  |
| TCGA-06-2569-01 | 4.0789  | 0.43  |
| TCGA-14-0790-01 | 0.2852  | 13.76 |
| TCGA-14-2554-01 | -0.86   | 17.48 |
| TCGA-27-1831-01 | 2.4167  | 16.59 |
| TCGA-27-1835-01 | -0.3548 | 21.29 |
| TCGA-27-1837-01 | -0.1303 | 14.03 |
| TCGA-27-2519-01 | -0.6173 | 18.07 |
| TCGA-27-2523-01 | 0.4899  | 16.06 |
| TCGA-27-2524-01 | 1.5787  | 7.59  |
| TCGA-27-2526-01 | -0.8123 | 2.86  |
| TCGA-27-2528-01 | -0.84   | 15.77 |
| TCGA-28-1747-01 | -0.974  | 2.53  |
| TCGA-28-1753-01 | -0.3282 | 1.22  |
| TCGA-28-2509-01 | 0.1961  | 4.76  |
| TCGA-28-2513-01 | 1.3239  | 7.29  |
| TCGA-28-2514-01 | -1.2338 | 5.26  |
| TCGA-32-1970-01 | -0.9834 | 15.37 |
| TCGA-32-1982-01 | -0.3004 | 4.66  |
| TCGA-06-0130-01 | 4.3612  | 12.94 |
| TCGA-06-0141-01 | 0.5535  | 10.28 |
| TCGA-12-3650-01 | 1.5345  | 10.94 |
| TCGA-12-3652-01 | 0.8402  | 34.89 |
| TCGA-12-3653-01 | -0.7737 | 14.52 |
| TCGA-19-1390-01 | -0.2636 | 25.36 |
| TCGA-19-2619-01 | -1.1218 | 9.66  |
| TCGA-19-2620-01 | -1.0181 | 4.86  |
| TCGA-19-2624-01 | -0.1528 | 0.16  |
| TCGA-19-2625-01 | 0.9599  | 4.07  |
| TCGA-32-2615-01 | -0.6345 | 15.93 |
| TCGA-32-2632-01 | -0.972  | 8.84  |
| TCGA-32-2634-01 | 0.913   | 22.77 |
| TCGA-32-2638-01 | 0.0676  | 25.16 |
| TCGA-41-2571-01 | 0.6556  | 0.85  |
| TCGA-06-0132-01 | -1.1509 | 25.33 |
| TCGA-06-0157-01 | 0.9979  | 3.19  |
| TCGA-06-0158-01 | -0.8582 | 10.81 |
| TCGA-06-0168-01 | -0.5847 | 19.65 |
| TCGA-06-0174-01 | -0.1793 | 3.22  |
| TCGA-06-0178-01 | -0.8201 | 88.07 |
| TCGA-06-0184-01 | -0.7286 | 69.84 |
| TCGA-06-0219-01 | 1.6902  | 0.72  |
| TCGA-32-4213-01 | 1.4928  | 19.84 |

|                 |         |       |
|-----------------|---------|-------|
| TCGA-41-2572-01 | 0.5059  | 13.34 |
| TCGA-41-3915-01 | -0.544  | 11.83 |
| TCGA-41-4097-01 | -0.2855 | 0.2   |
| TCGA-06-0238-01 | -0.0471 | 13.3  |
| TCGA-06-0644-01 | 2.6265  | 12.61 |
| TCGA-06-0645-01 | -0.8177 | 5.75  |
| TCGA-06-0646-01 | -0.3776 | 5.75  |
| TCGA-08-0386-01 | -0.6398 | 18    |
| TCGA-12-0616-01 | 0.4504  | 14.72 |
| TCGA-12-0618-01 | 0.4272  | 12.98 |
| TCGA-12-0619-01 | 0.6641  | 34.89 |
| TCGA-06-5414-01 | -0.3685 | 8.97  |
| TCGA-06-5415-01 | -1.1228 | 8.54  |
| TCGA-06-5418-01 | 0.703   | 2.73  |
| TCGA-12-5295-01 | 0.4276  | 14.91 |
| TCGA-12-5299-01 | 0.9397  | 3.22  |
| TCGA-26-5132-01 | 0.0595  | 9.4   |
| TCGA-26-5133-01 | -1.1984 | 14.85 |
| TCGA-26-5134-01 | -0.5232 | 5.49  |
| TCGA-26-5135-01 | -0.3601 | 8.87  |
| TCGA-26-5136-01 | 0.0355  | 18.96 |
| TCGA-26-5139-01 | -0.1824 | 1.58  |
| TCGA-28-5204-01 | 0.0985  | 14.91 |
| TCGA-28-5207-01 | -0.3138 | 11.27 |
| TCGA-28-5208-01 | 0.1082  | 17.87 |
| TCGA-28-5209-01 | -0.2803 | 14.52 |
| TCGA-28-5213-01 | -0.7172 | 31.24 |
| TCGA-28-5215-01 | -0.2062 | 11.01 |
| TCGA-28-5216-01 | -1.002  | 13.63 |
| TCGA-28-5218-01 | 1.3513  | 5.16  |
| TCGA-28-5220-01 | -0.5255 | 12.75 |
| TCGA-32-5222-01 | -0.2086 | 19.22 |
| TCGA-76-4925-01 | 0.2666  | 4.8   |
| TCGA-76-4926-01 | 0.3499  | 4.53  |
| TCGA-76-4928-01 | 2.1622  | 3.09  |
| TCGA-76-4929-01 | -0.5894 | 3.65  |
| TCGA-76-4931-01 | -0.4671 | 9.17  |
| TCGA-06-0649-01 | -0.5463 | 2.1   |
| TCGA-06-0686-01 | 0.1357  | 14.19 |
| TCGA-06-0743-01 | 0.4991  | 26.38 |
| TCGA-06-0744-01 | 0.6158  | 46.85 |
| TCGA-06-0745-01 | 2.268   | 7.85  |
| TCGA-06-0747-01 | 2.2778  | 2.69  |

|                 |         |       |
|-----------------|---------|-------|
| TCGA-06-0749-01 | -0.5897 | 2.69  |
| TCGA-06-0750-01 | 0.9458  | 0.92  |
| TCGA-15-0742-01 | 0.1724  | 13.76 |

---

**Supplementary Table 4.** Statistical analysis for LDA shown on Figure 2D using ELDA software (<http://bioinf.wehi.edu.au/software/elda/>)

**NCI827**

| <b>Group 1</b> | <b>Group 2</b> | <b>Chi-sq</b> | <b>DF</b> | <b>Pr (&gt; Chi-sq)</b> |
|----------------|----------------|---------------|-----------|-------------------------|
| NT             | shMDK-1        | 22.8          | 1         | 1.82e-06                |
| NT             | sh MDK-2       | 22.8          | 1         | 1.82e-06                |
| sh MDK-1       | shMDK-2        | 0             | 1         | 1                       |

**NCI131**

| <b>Group 1</b> | <b>Group 2</b> | <b>Chi-sq</b> | <b>DF</b> | <b>Pr (&gt; Chi-sq)</b> |
|----------------|----------------|---------------|-----------|-------------------------|
| NT             | shMDK-1        | 27.5          | 1         | 1.55e-07                |
| NT             | shMDK-2        | 9.5           | 1         | 2.06e-03                |
| shMDK-1        | shMDK-2        | 5.88          | 1         | 1.53e-02                |

**Supplementary Table 5.** List of genes used in DEG analysis in Fig. 3a

| Category | Gene symbol | log2(Fold_change) | p-value     | Benjamini   |
|----------|-------------|-------------------|-------------|-------------|
| up       | GDF15       | 3.596455717       | 2.2569E-135 | 2.5078E-131 |
| up       | FTL         | 0.787675007       | 9.0577E-116 | 5.0324E-112 |
| up       | B2M         | 0.525579511       | 2.6079E-107 | 9.6598E-104 |
| up       | FTH1        | 0.584209458       | 2.8331E-50  | 5.2469E-47  |
| up       | DDIT4       | 1.532769516       | 1.77411E-30 | 1.31426E-27 |
| up       | CHI3L1      | 0.620671942       | 1.02061E-28 | 6.67121E-26 |
| up       | GADD45A     | 0.972577219       | 6.49365E-20 | 2.32766E-17 |
| up       | CRYAB       | 0.65833518        | 3.14859E-19 | 1.06022E-16 |
| up       | DDIT3       | 1.190323408       | 7.47492E-19 | 2.30726E-16 |
| up       | RPL12       | 0.552068473       | 5.66029E-17 | 1.57243E-14 |
| up       | NUPR1       | 1.376765551       | 2.51033E-16 | 6.48715E-14 |
| up       | SDCBP       | 0.75113177        | 7.30275E-16 | 1.80329E-13 |
| up       | SPP1        | 0.512467392       | 2.52121E-13 | 4.59273E-11 |
| up       | CDKN1A      | 1.179502464       | 1.56818E-12 | 2.64024E-10 |
| up       | WBP2        | 0.916807034       | 3.46884E-12 | 5.35358E-10 |
| up       | UPP1        | 0.647243341       | 7.86111E-12 | 1.14938E-09 |
| up       | TRIB3       | 1.063013841       | 1.17274E-10 | 1.49788E-08 |
| up       | MYC         | 0.638019815       | 2.07569E-10 | 2.59158E-08 |
| up       | ZNFX1-AS1   | 0.501786497       | 2.26506E-10 | 2.79659E-08 |
| up       | ADM         | 1.261742147       | 4.70157E-10 | 5.33101E-08 |
| up       | SLC3A2      | 0.590152266       | 9.50334E-10 | 1.0353E-07  |
| up       | COX7A2L     | 0.512644355       | 3.66192E-09 | 3.50786E-07 |
| up       | REN         | 4.107949868       | 4.02821E-09 | 3.82576E-07 |
| up       | SOD2        | 0.766910646       | 1.07501E-08 | 9.71176E-07 |
| up       | CNBP        | 0.515600541       | 1.48634E-08 | 1.30049E-06 |
| up       | PCNP        | 0.711071097       | 1.58124E-08 | 1.37272E-06 |
| up       | RABGGTB     | 0.661276177       | 2.90263E-08 | 2.40702E-06 |
| up       | ZFP36L1     | 0.955534858       | 3.07361E-08 | 2.51132E-06 |
| up       | RPL13A      | 0.537484914       | 9.85641E-08 | 7.4003E-06  |
| up       | ASNS        | 0.85224763        | 1.36196E-07 | 1.00226E-05 |
| up       | SERPINE1    | 1.420671177       | 1.88638E-07 | 1.35235E-05 |
| up       | CYSTM1      | 0.544393427       | 2.77418E-06 | 0.000152607 |
| up       | PPP1CB      | 0.519179091       | 2.95154E-06 | 0.000159988 |
| up       | MSMO1       | 0.580405817       | 3.80375E-06 | 0.000201273 |
| up       | HNRNPC      | 0.551362516       | 8.48926E-06 | 0.000419256 |
| up       | SRXN1       | 0.714033381       | 1.05605E-05 | 0.000508002 |
| up       | DIRAS3      | 0.783997114       | 1.26322E-05 | 0.000599868 |
| up       | HEY1        | 0.675954583       | 1.28697E-05 | 0.000605969 |
| up       | IVNS1ABP    | 0.861737921       | 1.38213E-05 | 0.000645303 |
| up       | BHLHE41     | 1.079887757       | 2.13021E-05 | 0.000935608 |
| up       | EGFR        | 1.098834231       | 2.17809E-05 | 0.000952873 |
| up       | RGS16       | 1.512013043       | 2.63232E-05 | 0.001120704 |
| up       | PHGDH       | 0.629148841       | 3.29881E-05 | 0.001362691 |
| up       | GEM         | 1.090973136       | 4.34809E-05 | 0.001737984 |
| up       | DDX17       | 0.588135698       | 4.94798E-05 | 0.001929192 |
| up       | FOS         | 1.137178434       | 5.031E-05   | 0.001941127 |
| up       | BOD1        | 0.636536185       | 6.31362E-05 | 0.002346386 |
| up       | CTGF        | 1.253530042       | 8.75323E-05 | 0.003058676 |
| up       | MAP1LC3B    | 0.602023737       | 0.000140347 | 0.004573422 |
| up       | ATP6V1G1    | 0.510550562       | 0.00014129  | 0.004590691 |
| up       | STAG3L4     | 1.227639089       | 0.000178753 | 0.005579504 |

|      |              |              |             |             |
|------|--------------|--------------|-------------|-------------|
| up   | SAT2         | 0.556100128  | 0.000229987 | 0.006944621 |
| up   | DKK1         | 0.522935971  | 0.000270961 | 0.008029124 |
| up   | PPP1R15A     | 0.776135057  | 0.00035026  | 0.010005372 |
| up   | SNORD68      | 1.290576148  | 0.000398247 | 0.01109104  |
| up   | DHX9         | 0.52023389   | 0.000419255 | 0.011503104 |
| up   | MTHFD2       | 0.59172233   | 0.000501241 | 0.013388918 |
| up   | GNPDA1       | 0.592016877  | 0.000553275 | 0.014465862 |
| up   | RND3         | 1.303527413  | 0.000573874 | 0.014899261 |
| up   | FAM102A      | 1.288404595  | 0.000594009 | 0.01535303  |
| up   | RFK          | 0.622466956  | 0.000826318 | 0.020224762 |
| up   | RRAGD        | 0.632031471  | 0.000916935 | 0.021817944 |
| up   | EPB41L4A-AS1 | 0.853184594  | 0.000936971 | 0.022058526 |
| up   | CCNB1IP1     | 0.594875571  | 0.001008416 | 0.023344829 |
| up   | SF1          | 0.550560462  | 0.001086628 | 0.024947546 |
| up   | XBP1         | 0.53002795   | 0.001237235 | 0.027441427 |
| up   | LITAF        | 0.711535504  | 0.001319585 | 0.028639122 |
| up   | ARL4C        | 0.56659611   | 0.001369182 | 0.029202203 |
| up   | ETNK2        | 0.857667959  | 0.001410476 | 0.030025306 |
| up   | PCP4         | 0.62213214   | 0.001556363 | 0.032508086 |
| up   | CAMLG        | 0.545703414  | 0.001835798 | 0.037022475 |
| up   | UBE2G2       | 0.721721101  | 0.001945801 | 0.03861025  |
| up   | DUSP5        | 0.600070043  | 0.001992425 | 0.03925502  |
| up   | PMAIP1       | 0.848499034  | 0.002269919 | 0.043264734 |
| down | HSPA8        | -0.56812526  | 1.09353E-56 | 2.43027E-53 |
| down | CCNB1        | -1.468150209 | 1.31837E-26 | 6.97606E-24 |
| down | DDX1         | -0.662079779 | 2.12543E-24 | 1.02686E-21 |
| down | ID1          | -1.692992017 | 1.87642E-22 | 7.44671E-20 |
| down | HSPA1A       | -1.425500753 | 5.62175E-19 | 1.78482E-16 |
| down | METRNL       | -0.673735787 | 6.37424E-16 | 1.60979E-13 |
| down | KPNA2        | -0.855723613 | 1.15781E-15 | 2.79687E-13 |
| down | UBE2S        | -0.680168881 | 2.71776E-15 | 6.29161E-13 |
| down | ID3          | -0.758356195 | 4.001E-15   | 9.07328E-13 |
| down | FLNA         | -0.953472669 | 1.08165E-14 | 2.31139E-12 |
| down | TST          | -1.987295287 | 1.51269E-14 | 3.17151E-12 |
| down | HNRNPDL      | -0.762711687 | 2.56642E-14 | 5.28113E-12 |
| down | DYNLT1       | -0.713538357 | 2.58744E-14 | 5.22758E-12 |
| down | PPP1R35      | -1.193946178 | 1.53317E-13 | 2.93733E-11 |
| down | UBE2C        | -0.691637684 | 1.6446E-13  | 3.09742E-11 |
| down | MARCKSL1     | -0.646776624 | 1.70091E-13 | 3.15008E-11 |
| down | PLK1         | -2.036613496 | 5.45059E-13 | 9.6138E-11  |
| down | NES          | -0.965522551 | 1.80778E-12 | 2.99822E-10 |
| down | FASTK        | -1.562358199 | 1.93399E-12 | 3.16036E-10 |
| down | TUBB6        | -0.814290121 | 3.20512E-12 | 5.0879E-10  |
| down | WNT7B        | -1.577371418 | 3.28529E-12 | 5.1417E-10  |
| down | AURKA        | -1.506101344 | 1.03108E-11 | 1.46889E-09 |
| down | TUBB4B       | -0.523146014 | 1.33181E-11 | 1.87329E-09 |
| down | MRPL27       | -0.595410202 | 2.6137E-11  | 3.63042E-09 |
| down | TUBB3        | -0.693976032 | 2.72271E-11 | 3.73516E-09 |
| down | H2AFX        | -0.562563798 | 4.8237E-11  | 6.38107E-09 |
| down | FAM173A      | -0.918305795 | 1.32481E-10 | 1.67288E-08 |
| down | MRPS16       | -1.018260983 | 3.20606E-10 | 3.83072E-08 |
| down | DTYMK        | -0.64780297  | 3.29208E-10 | 3.89166E-08 |
| down | RFC2         | -1.183291798 | 3.47799E-10 | 4.06815E-08 |
| down | SIVA1        | -0.557749936 | 4.20228E-10 | 4.814E-08   |
| down | UBA1         | -0.773013723 | 4.90821E-10 | 5.454E-08   |
| down | MRPL24       | -0.57435338  | 5.28195E-10 | 5.81119E-08 |

|      |         |              |             |             |
|------|---------|--------------|-------------|-------------|
| down | REEP4   | -1.527791043 | 1.04809E-09 | 1.13072E-07 |
| down | CDC20   | -1.364566571 | 1.3442E-09  | 1.42255E-07 |
| down | SRSF1   | -0.662922931 | 1.66926E-09 | 1.70173E-07 |
| down | NDC80   | -1.635274356 | 4.33912E-09 | 4.08612E-07 |
| down | PSMG4   | -1.369903218 | 4.62372E-09 | 4.31755E-07 |
| down | PAQR4   | -1.915156226 | 5.07679E-09 | 4.70111E-07 |
| down | MBD3    | -0.738797677 | 1.3558E-08  | 1.20526E-06 |
| down | CEND1   | -1.100897837 | 1.37621E-08 | 1.21369E-06 |
| down | H1FX    | -0.596384558 | 1.86302E-08 | 1.59245E-06 |
| down | CD82    | -1.02213415  | 2.73237E-08 | 2.30016E-06 |
| down | RANGAP1 | -0.711934096 | 3.0441E-08  | 2.50564E-06 |
| down | ARHGDI  | -0.518680292 | 4.79041E-08 | 3.80222E-06 |
| down | TRAPPC4 | -0.576480199 | 4.82398E-08 | 3.8017E-06  |
| down | CCL2    | -0.730776894 | 5.02917E-08 | 3.9355E-06  |
| down | DBNL    | -0.906936355 | 5.43023E-08 | 4.21963E-06 |
| down | PSRC1   | -1.049387509 | 7.82919E-08 | 6.04153E-06 |
| down | CCNB2   | -0.952873991 | 8.21821E-08 | 6.29798E-06 |
| down | POP5    | -0.966786702 | 8.45789E-08 | 6.39347E-06 |
| down | TOP2A   | -1.38503518  | 1.01637E-07 | 7.57977E-06 |
| down | RBMX    | -0.719965233 | 1.42879E-07 | 1.04452E-05 |
| down | CSRP1   | -0.685849153 | 1.81372E-07 | 1.30871E-05 |
| down | GAP43   | -0.816531204 | 2.3485E-07  | 1.64129E-05 |
| down | TPX2    | -0.944233642 | 2.486E-07   | 1.7158E-05  |
| down | PPM1G   | -0.654936617 | 2.80833E-07 | 1.91449E-05 |
| down | HSPA1B  | -0.522719709 | 2.84451E-07 | 1.92733E-05 |
| down | ACTN4   | -1.272755429 | 4.43649E-07 | 2.8999E-05  |
| down | MYH9    | -0.941844225 | 4.48308E-07 | 2.91322E-05 |
| down | MVD     | -0.944421198 | 4.64015E-07 | 2.99775E-05 |
| down | DUS1L   | -1.356393755 | 4.89252E-07 | 3.14253E-05 |
| down | LMNB1   | -0.79521887  | 5.74978E-07 | 3.65095E-05 |
| down | FAM129B | -0.669355762 | 6.10015E-07 | 3.85141E-05 |
| down | SRSF6   | -0.916620996 | 6.12553E-07 | 3.84558E-05 |
| down | FARSA   | -0.877149023 | 6.74918E-07 | 4.18977E-05 |
| down | ASF1B   | -1.179826276 | 7.12544E-07 | 4.37447E-05 |
| down | CDC37   | -1.099657453 | 7.75985E-07 | 4.71188E-05 |
| down | TACC3   | -1.148549767 | 8.74922E-07 | 5.22695E-05 |
| down | SLC4A2  | -1.007942189 | 9.74833E-07 | 5.76189E-05 |
| down | CD97    | -1.042491544 | 1.27933E-06 | 7.48203E-05 |
| down | U2AF2   | -1.127264157 | 1.36381E-06 | 7.89306E-05 |
| down | MAD1L1  | -1.728409079 | 1.40038E-06 | 8.06273E-05 |
| down | TMEM101 | -1.257661669 | 1.52507E-06 | 8.69058E-05 |
| down | PVRL1   | -0.966759596 | 1.64412E-06 | 9.32117E-05 |
| down | XPO1    | -0.807827861 | 1.67537E-06 | 9.45012E-05 |
| down | PLXNA1  | -1.589131438 | 2.36285E-06 | 0.00013128  |
| down | EPB49   | -0.51015539  | 2.92552E-06 | 0.000159355 |
| down | PLEC    | -1.322898541 | 3.29165E-06 | 0.000177557 |
| down | OGDH    | -1.212940536 | 3.53786E-06 | 0.000189916 |
| down | FADS2   | -0.644274194 | 3.7321E-06  | 0.00019938  |
| down | TRIM65  | -2.159929979 | 3.79926E-06 | 0.000201997 |
| down | OLIG1   | -1.144616698 | 4.05473E-06 | 0.000213536 |
| down | SF3B3   | -1.50134903  | 4.24086E-06 | 0.000222285 |
| down | PORCN   | -0.896222363 | 4.53173E-06 | 0.000236416 |
| down | PSMD1   | -0.798609299 | 4.64538E-06 | 0.000241212 |
| down | NPDC1   | -0.63421029  | 4.68684E-06 | 0.000242233 |
| down | CBR3    | -0.734775173 | 6.33553E-06 | 0.000321463 |
| down | KIF4A   | -1.285258796 | 7.53183E-06 | 0.000380426 |

|      |          |              |             |             |
|------|----------|--------------|-------------|-------------|
| down | PDCD6    | -0.542074508 | 8.45798E-06 | 0.000419576 |
| down | TTYH3    | -1.127948152 | 9.42622E-06 | 0.000461428 |
| down | PPP2R4   | -0.697231682 | 1.01641E-05 | 0.000491057 |
| down | CDCA3    | -1.070119618 | 1.07336E-05 | 0.000511895 |
| down | NOP58    | -0.630482522 | 1.3263E-05  | 0.000621851 |
| down | AGPAT1   | -0.919459383 | 1.41611E-05 | 0.000658402 |
| down | RBM4B    | -1.711104599 | 1.51457E-05 | 0.00069545  |
| down | RMI2     | -0.910678068 | 1.65469E-05 | 0.00075356  |
| down | METTTL7B | -0.744104419 | 1.84745E-05 | 0.000837912 |
| down | FAM83D   | -1.224027032 | 1.85044E-05 | 0.000835856 |
| down | HES6     | -0.591965216 | 1.86107E-05 | 0.000837254 |
| down | FAM20C   | -1.143286179 | 1.94615E-05 | 0.000868499 |
| down | GNL2     | -1.558591858 | 2.1175E-05  | 0.000933715 |
| down | KIF22    | -0.957951314 | 2.22444E-05 | 0.000965545 |
| down | SLC12A9  | -1.424466276 | 2.23717E-05 | 0.000963542 |
| down | WDR13    | -0.917297373 | 2.37199E-05 | 0.001017666 |
| down | KIF2C    | -1.113653857 | 2.7289E-05  | 0.001157387 |
| down | MAP7D1   | -0.781510996 | 3.23581E-05 | 0.001341655 |
| down | ATXN10   | -0.612355864 | 3.74985E-05 | 0.001537578 |
| down | TMEM129  | -1.406262739 | 3.95602E-05 | 0.001604354 |
| down | SLC2A6   | -1.768490083 | 3.99279E-05 | 0.001613377 |
| down | MCM4     | -0.692848585 | 4.31768E-05 | 0.001732062 |
| down | COQ9     | -0.835080454 | 4.37718E-05 | 0.001743342 |
| down | NR2F6    | -0.777825682 | 4.50292E-05 | 0.001787015 |
| down | C1QTNF1  | -0.882885843 | 4.56504E-05 | 0.00180522  |
| down | FAM64A   | -0.863913979 | 4.74673E-05 | 0.001863803 |
| down | CCAR1    | -1.213350023 | 4.79921E-05 | 0.001877777 |
| down | RHOB     | -0.758402861 | 5.01888E-05 | 0.001943198 |
| down | THOP1    | -1.03649577  | 5.44549E-05 | 0.002079393 |
| down | USP5     | -0.818436115 | 5.66591E-05 | 0.002148793 |
| down | PARP12   | -1.590569969 | 5.98865E-05 | 0.002240601 |
| down | MRPL38   | -0.667739536 | 6.35131E-05 | 0.002352524 |
| down | FTSJ1    | -0.546942961 | 7.12185E-05 | 0.002620463 |
| down | OXLD1    | -0.91884636  | 7.14939E-05 | 0.002621916 |
| down | MRPL1    | -0.690838771 | 7.29778E-05 | 0.002658786 |
| down | SMOC1    | -0.692896135 | 7.82654E-05 | 0.002823654 |
| down | TWF2     | -0.521752779 | 7.99142E-05 | 0.002873807 |
| down | NCAPD2   | -1.424861076 | 8.10962E-05 | 0.002906905 |
| down | TXNIP    | -0.626225898 | 8.38462E-05 | 0.002976673 |
| down | CHORDC1  | -1.195024142 | 8.49776E-05 | 0.003007232 |
| down | TMEM165  | -1.053752485 | 8.52197E-05 | 0.003006226 |
| down | SPAG5    | -1.376622118 | 8.55171E-05 | 0.003007173 |
| down | OBSL1    | -1.314220489 | 8.81803E-05 | 0.00307166  |
| down | NTHL1    | -0.597128266 | 8.89677E-05 | 0.003089404 |
| down | AKT1     | -0.811838437 | 8.9397E-05  | 0.003094641 |
| down | ATIC     | -0.551594537 | 0.000102483 | 0.00351478  |
| down | MEPCE    | -0.829852551 | 0.000102793 | 0.003514576 |
| down | CDKN2C   | -0.834397554 | 0.000104473 | 0.003561055 |
| down | APOBEC3C | -1.413623576 | 0.000108951 | 0.003679844 |
| down | CENPA    | -1.624567917 | 0.000110889 | 0.003733919 |
| down | SAFB     | -0.862830156 | 0.000112107 | 0.003763539 |
| down | CHD4     | -0.886621002 | 0.000117724 | 0.003940195 |
| down | NPTX2    | -1.954372768 | 0.000122658 | 0.004093035 |
| down | HNRPDL   | -0.754151393 | 0.000122935 | 0.004077756 |
| down | MAGED1   | -0.505174707 | 0.000132897 | 0.004382046 |
| down | MPG      | -0.632900852 | 0.000134367 | 0.00441743  |

|      |         |              |             |             |
|------|---------|--------------|-------------|-------------|
| down | SIGMAR1 | -1.163270153 | 0.00014444  | 0.004679355 |
| down | LRRC45  | -1.606101979 | 0.000159108 | 0.005080492 |
| down | ITPA    | -0.500580507 | 0.000169002 | 0.005365559 |
| down | DAB2IP  | -1.131037632 | 0.000171002 | 0.00539822  |
| down | CCNF    | -1.603637226 | 0.000177678 | 0.005577294 |
| down | SDSL    | -0.917702092 | 0.00017869  | 0.005593261 |
| down | CHMP6   | -1.186298846 | 0.000185064 | 0.005760309 |
| down | ANAPC2  | -1.850292644 | 0.000203131 | 0.006287428 |
| down | POLD4   | -0.729968004 | 0.000209795 | 0.006457743 |
| down | B3GAT3  | -0.62722063  | 0.000212957 | 0.006536945 |
| down | SAFB2   | -1.830668896 | 0.000215422 | 0.006594408 |
| down | TCF25   | -0.820735988 | 0.000215693 | 0.00658457  |
| down | LRRC17  | -1.089364313 | 0.000228096 | 0.006925154 |
| down | OCIAD1  | -0.6419677   | 0.000228299 | 0.006912417 |
| down | SLC38A5 | -0.504929247 | 0.000230982 | 0.006955746 |
| down | NUDT22  | -0.775978952 | 0.00023394  | 0.007025796 |
| down | UNC50   | -0.68222831  | 0.000235088 | 0.007041245 |
| down | PYCR2   | -0.558539968 | 0.000269406 | 0.008004369 |
| down | SREBF1  | -1.396771319 | 0.000283649 | 0.008360486 |
| down | SLC27A4 | -1.046551434 | 0.000312737 | 0.009097214 |
| down | MAVS    | -1.271194751 | 0.00032261  | 0.00931127  |
| down | FAM165B | -0.570318446 | 0.000330348 | 0.00950991  |
| down | VAR5    | -1.030412068 | 0.000366379 | 0.010385732 |
| down | IRF3    | -1.175488215 | 0.000370269 | 0.010469272 |
| down | HEATR2  | -1.12633273  | 0.000372707 | 0.010484849 |
| down | RACGAP1 | -0.771959071 | 0.000375686 | 0.01054197  |
| down | DNMT1   | -1.335857596 | 0.000394692 | 0.011019643 |
| down | SRSF11  | -0.731798034 | 0.000421829 | 0.011545235 |
| down | SDHA    | -0.711833277 | 0.00042421  | 0.011581858 |
| down | NGEF    | -0.93097441  | 0.000426821 | 0.011624595 |
| down | HYOU1   | -0.813744803 | 0.000464283 | 0.012583191 |
| down | VASP    | -0.64571036  | 0.000465903 | 0.01259639  |
| down | CDH2    | -0.616290765 | 0.000466957 | 0.012594237 |
| down | RUVBL1  | -0.5027617   | 0.000467468 | 0.012577505 |
| down | RRP36   | -0.654621956 | 0.000484548 | 0.013005558 |
| down | NCLN    | -0.838196478 | 0.000501199 | 0.013420066 |
| down | AURKB   | -0.677508233 | 0.000506758 | 0.013503833 |
| down | ZDHHC16 | -1.293690562 | 0.000510827 | 0.013579692 |
| down | MUS81   | -1.711955059 | 0.000511675 | 0.013569759 |
| down | DGCR2   | -1.247213066 | 0.00052113  | 0.013754864 |
| down | TMEM43  | -0.769484065 | 0.000522811 | 0.013766543 |
| down | DLGAP5  | -1.505646566 | 0.00060617  | 0.015628205 |
| down | PKMYT1  | -1.296128498 | 0.000611166 | 0.015720544 |
| down | ABCB6   | -1.475659493 | 0.00061892  | 0.01584663  |
| down | SMC4    | -0.769522796 | 0.000620552 | 0.015851895 |
| down | KIFC1   | -1.3054727   | 0.000636014 | 0.016209617 |
| down | CDC45   | -1.355000963 | 0.000667002 | 0.016921747 |
| down | CRMP1   | -0.987588787 | 0.000676191 | 0.017115804 |
| down | TYRO3   | -1.077288348 | 0.000677096 | 0.017099745 |
| down | ANAPC7  | -0.986255205 | 0.000714822 | 0.017970811 |
| down | SLC25A1 | -0.577109445 | 0.000719619 | 0.01800993  |
| down | STOML1  | -1.470443039 | 0.000721416 | 0.018014336 |
| down | DBN1    | -0.747488862 | 0.000757397 | 0.018828178 |
| down | CCNA2   | -0.793454753 | 0.0007657   | 0.018992101 |
| down | NT5DC2  | -0.731505533 | 0.000808826 | 0.019928323 |
| down | SYMPK   | -1.409339822 | 0.000820402 | 0.020168821 |

|      |            |              |             |             |
|------|------------|--------------|-------------|-------------|
| down | IDH1       | -0.576294126 | 0.000861145 | 0.020938818 |
| down | TSPAN18    | -1.165879118 | 0.000865632 | 0.021001968 |
| down | ARRDC1     | -1.391531588 | 0.000872958 | 0.021087638 |
| down | AP1B1      | -0.906315942 | 0.00089968  | 0.021545783 |
| down | MRPL9      | -0.525387097 | 0.000915011 | 0.021818885 |
| down | TRADD      | -1.774633534 | 0.000930377 | 0.022043388 |
| down | MRM1       | -1.850981124 | 0.000952542 | 0.022377685 |
| down | LIMK1      | -1.090713817 | 0.000956462 | 0.022375181 |
| down | SND1       | -0.610503886 | 0.000960859 | 0.022430802 |
| down | SAAL1      | -0.924471224 | 0.000998612 | 0.023214591 |
| down | ACTN1      | -0.601201998 | 0.001020885 | 0.023584365 |
| down | TPGS1      | -0.743621775 | 0.001090614 | 0.02498743  |
| down | DEPDC1     | -1.332681738 | 0.001101758 | 0.025139076 |
| down | PYCRL      | -2.419139435 | 0.001130673 | 0.025745976 |
| down | FASN       | -0.950375361 | 0.00116871  | 0.026395752 |
| down | GTF3C5     | -0.572487228 | 0.001196286 | 0.026854798 |
| down | ZFYVE19    | -1.018736937 | 0.001197101 | 0.026818928 |
| down | CDKN2AIPNL | -0.591398866 | 0.001201456 | 0.026862326 |
| down | ARF3       | -0.614276164 | 0.001246172 | 0.027584581 |
| down | SHMT1      | -1.29009219  | 0.001246973 | 0.027547448 |
| down | LIPG       | -1.191569421 | 0.001280727 | 0.028069904 |
| down | NCOA5      | -1.192684308 | 0.001285996 | 0.028129893 |
| down | CHTF8      | -0.816908797 | 0.001297079 | 0.028316577 |
| down | ANKRD52    | -1.595416887 | 0.001299509 | 0.028314018 |
| down | IVD        | -1.18468546  | 0.001302465 | 0.028322886 |
| down | NDOR1      | -1.772147697 | 0.001319951 | 0.028591215 |
| down | PRR11      | -1.135115689 | 0.001341425 | 0.028943521 |
| down | APEH       | -0.625195921 | 0.001347612 | 0.028964532 |
| down | POLA2      | -1.27379517  | 0.001349019 | 0.028938791 |
| down | H1F0       | -0.543447805 | 0.001358492 | 0.02902993  |
| down | OIP5       | -0.774269797 | 0.001420759 | 0.030186373 |
| down | TMEM42     | -0.963143451 | 0.001490399 | 0.031425636 |
| down | SCRIB      | -0.796445552 | 0.001509737 | 0.031773106 |
| down | KIF20A     | -2.048411436 | 0.001556948 | 0.032459289 |
| down | KIF11      | -0.976629957 | 0.001611862 | 0.033541218 |
| down | ZWINT      | -0.62188351  | 0.001617899 | 0.033603916 |
| down | TELO2      | -1.112518331 | 0.001644245 | 0.03402392  |
| down | NUF2       | -0.928334483 | 0.001651511 | 0.034047477 |
| down | STAT6      | -1.63177822  | 0.001698123 | 0.034879015 |
| down | TH1L       | -0.81353976  | 0.001765409 | 0.035928993 |
| down | KPNB1      | -0.650623769 | 0.001771373 | 0.035984461 |
| down | ARL16      | -0.544653985 | 0.001810417 | 0.036643637 |
| down | MATR3      | -0.526521689 | 0.001823554 | 0.03684243  |
| down | LSS        | -0.949157416 | 0.001854277 | 0.037327407 |
| down | FLYWCH2    | -0.83747957  | 0.001864999 | 0.037475358 |
| down | GPS2       | -0.837117645 | 0.001870354 | 0.037515106 |
| down | CDCA8      | -1.001850219 | 0.00188897  | 0.037752215 |
| down | SLC25A13   | -1.01884016  | 0.001902082 | 0.037946018 |
| down | GYS1       | -1.203594684 | 0.001907661 | 0.037989118 |
| down | MYO1C      | -1.515928914 | 0.001938558 | 0.038535352 |
| down | ZNF771     | -1.258413232 | 0.001951184 | 0.038648043 |
| down | DDX19A     | -0.929166909 | 0.001984642 | 0.039171132 |
| down | GAS2L1     | -0.92231321  | 0.002020766 | 0.039742931 |
| down | SLC9A3R2   | -0.553482079 | 0.002090179 | 0.041035463 |
| down | GCN1L1     | -1.35657563  | 0.002102165 | 0.041197987 |
| down | PARP10     | -1.274293884 | 0.002161106 | 0.042130195 |

|      |          |              |             |             |
|------|----------|--------------|-------------|-------------|
| down | LRP11    | -0.730847266 | 0.002193104 | 0.042679103 |
| down | AIF1L    | -0.552572122 | 0.002196554 | 0.042597048 |
| down | HK1      | -0.575494215 | 0.002196827 | 0.042528112 |
| down | CCDC22   | -1.076150362 | 0.002203253 | 0.042578344 |
| down | RPRML    | -0.79207035  | 0.002203572 | 0.042510573 |
| down | NOS2     | -2.419015464 | 0.002205114 | 0.042466598 |
| down | PRPF31   | -0.743246563 | 0.002216049 | 0.042603347 |
| down | ALG8     | -0.911745931 | 0.002282222 | 0.043424736 |
| down | NOG      | -1.036275966 | 0.002316715 | 0.043930616 |
| down | BUB1     | -0.9278213   | 0.002428384 | 0.045735945 |
| down | PRPF6    | -0.637556852 | 0.002437376 | 0.04567305  |
| down | TNKS1BP1 | -1.219942012 | 0.002485964 | 0.046505112 |
| down | IPO4     | -1.21710291  | 0.002516056 | 0.046988938 |
| down | LFNG     | -1.013956058 | 0.002644423 | 0.049056482 |
| down | FAM216A  | -0.79607012  | 0.002693851 | 0.04989012  |

---

(Benjamini et al. 1995)

**Supplementary Table 6.** Information of selected gene-set demonstrated in Fig. 3b

| Category       | Accession  | Description                      | Count | p-value | Genes                                                                                                                                                                                                                                                                                                                 | List Total | Pop Hits | Fold Enrichment | Benjamini | FDR     |
|----------------|------------|----------------------------------|-------|---------|-----------------------------------------------------------------------------------------------------------------------------------------------------------------------------------------------------------------------------------------------------------------------------------------------------------------------|------------|----------|-----------------|-----------|---------|
| Up-regulated   | GO:0006979 | Response to oxidative stress     | 7     | 9.3E-05 | EGFR, FOS, CRYAB, SERPINE1, DDIT3, SRXN1, SOD2                                                                                                                                                                                                                                                                        | 62         | 164      | 9.3E+00         | 2.8E-02   | 1.4E-01 |
| Up-regulated   | GO:0007568 | Aging                            | 6     | 1.3E-04 | FOS, ADM, CRYAB, SERPINE1, DDIT3, SOD2                                                                                                                                                                                                                                                                                | 62         | 110      | 1.2E+01         | 2.4E-02   | 2.1E-01 |
| Up-regulated   | GO:0007050 | Cell cycle arrest                | 5     | 1.2E-03 | CDKN1A, PPP1R15A, GADD45A, MYC, DDIT3                                                                                                                                                                                                                                                                                 | 62         | 103      | 1.1E+01         | 9.4E-02   | 1.8E+00 |
| Up-regulated   | GO:0042127 | Regulation of cell proliferation | 11    | 2.5E-03 | EGFR, CDKN1A, CNBP, NUPR1, ADM, SERPINE1, SF1, PPP1CB, MYC, FTH1, SOD2                                                                                                                                                                                                                                                | 62         | 787      | 3.0E+00         | 1.4E-01   | 3.9E+00 |
| Up-regulated   | GO:0006974 | Response to DNA damage stimulus  | 7     | 6.5E-03 | CDKN1A, NUPR1, PPP1CB, PPP1R15A, GADD45A, DDIT3, SOD2                                                                                                                                                                                                                                                                 | 62         | 373      | 4.1E+00         | 2.7E-01   | 9.7E+00 |
| Up-regulated   | GO:0008637 | Apoptotic mitochondrial changes  | 3     | 8.6E-03 | PMAIP1, MYC, SOD2                                                                                                                                                                                                                                                                                                     | 62         | 31       | 2.1E+01         | 3.2E-01   | 1.3E+01 |
| Up-regulated   | GO:0006915 | Apoptosis                        | 8     | 1.8E-02 | LITAF, TRIB3, PMAIP1, PPP1R15A, GADD45A, MYC, SOD2, DDIT4                                                                                                                                                                                                                                                             | 62         | 602      | 2.9E+00         | 4.5E-01   | 2.5E+01 |
| Down-regulated | GO:0000280 | Nuclear division                 | 32    | 1.7E-21 | MAD1L1, KIFC1, KIF22, PKMYT1, AURKA, AURKB, FAM83D, KIF2C, CDCA8, OIP5, BUB1, CCNA2, TUBB3, CDCA3, ANAPC2, KIF11, DLGAP5, CCNF, TPX2, NUF2, CDC20, NDC80, UBE2C, SMC4, NCAPD2, CCNB1, CCNB2, SPAG5, PLK1, ZWINT, RUVBL1, ANAPC7                                                                                       | 206        | 220      | 9.6E+00         | 2.7E-18   | 2.9E-18 |
| Down-regulated | GO:0007067 | Mitosis                          | 32    | 1.7E-21 | MAD1L1, KIFC1, KIF22, PKMYT1, AURKA, AURKB, FAM83D, KIF2C, CDCA8, OIP5, BUB1, CCNA2, TUBB3, CDCA3, ANAPC2, KIF11, DLGAP5, CCNF, TPX2, NUF2, CDC20, NDC80, UBE2C, SMC4, NCAPD2, CCNB1, CCNB2, SPAG5, PLK1, ZWINT, RUVBL1, ANAPC7                                                                                       | 206        | 220      | 9.6E+00         | 2.7E-18   | 2.9E-18 |
| Down-regulated | GO:0000087 | M phase of mitotic cell cycle    | 32    | 3.0E-21 | MAD1L1, KIFC1, KIF22, PKMYT1, AURKA, AURKB, FAM83D, KIF2C, CDCA8, OIP5, BUB1, CCNA2, TUBB3, CDCA3, ANAPC2, KIF11, DLGAP5, CCNF, TPX2, NUF2, CDC20, NDC80, UBE2C, SMC4, NCAPD2, CCNB1, CCNB2, SPAG5, PLK1, ZWINT, RUVBL1, ANAPC7                                                                                       | 206        | 224      | 9.4E+00         | 2.3E-18   | 5.0E-18 |
| Down-regulated | GO:0022402 | Cell cycle process               | 44    | 6.0E-19 | MAD1L1, KIF22, KIFC1, PKMYT1, AURKA, AURKB, AKT1, FAM83D, KIF2C, CDCA8, OIP5, CDKN2C, CENPA, PSMD1, BUB1, H2AFX, LFNG, CCNA2, TUBB3, CDCA3, ANAPC2, KIF11, DLGAP5, CCNF, TPX2, NUF2, CDC20, NDC80, MYH9, RACGAP1, UBE2C, TACC3, SMC4, NCAPD2, CCNB1, PPM1G, CCNB2, SPAG5, PLK1, ZWINT, GASZL1, ANAPC7, RUVBL1, KIPNA2 | 206        | 565      | 5.1E+00         | 1.3E-16   | 1.0E-15 |
| Down-regulated | GO:0051301 | Cell division                    | 27    | 3.9E-13 | MAD1L1, KIFC1, AURKB, FAM83D, CDCA8, OIP5, BUB1, CCNA2, CDCA3, ANAPC2, KIF11, CCNF, NUF2, CDC20, NDC80, MYH9, UBE2C, RACGAP1, SMC4, NCAPD2, CCNB1, CCNB2, SPAG5, PLK1, ZWINT, RUVBL1, ANAPC7                                                                                                                          | 206        | 295      | 6.0E+00         | 6.7E-11   | 6.5E-10 |
| Down-regulated | GO:0051726 | Regulation of cell cycle         | 20    | 6.8E-07 | XPO1, MAD1L1, ANAPC2, DLGAP5, PKMYT1, TACC3, UBE2C, CDC37, SCRIB, AKT1, CCNB1, CDC45, CDKN2C, ZWINT, BUB1, RHOB, H2AFX, ID3, CCNA2, HSPA8                                                                                                                                                                             | 206        | 331      | 4.0E+00         | 9.6E-05   | 1.1E-03 |
| Down-regulated | GO:0007059 | Chromosome segregation           | 8     | 2.2E-04 | KIFC1, ZWINT, DLGAP5, NUF2, NDC80, TOP2A, NCAPD2, SMC4                                                                                                                                                                                                                                                                | 206        | 81       | 6.5E+00         | 2.1E-02   | 3.7E-01 |

## Supplementary Table 7. Information of each gene-set used in ssGSEA on Fig. 3c

| Description                                   | Category      | Gene list                                                                                                                                                                                                                                                                                                                                                                                                                                                                                                                                                                                                                                                                                                                                                                                                                                                                                                                                                                                                                                                                                                                                                                                                                                                                                                                                                                                                                                                                                                                                                                                                    |
|-----------------------------------------------|---------------|--------------------------------------------------------------------------------------------------------------------------------------------------------------------------------------------------------------------------------------------------------------------------------------------------------------------------------------------------------------------------------------------------------------------------------------------------------------------------------------------------------------------------------------------------------------------------------------------------------------------------------------------------------------------------------------------------------------------------------------------------------------------------------------------------------------------------------------------------------------------------------------------------------------------------------------------------------------------------------------------------------------------------------------------------------------------------------------------------------------------------------------------------------------------------------------------------------------------------------------------------------------------------------------------------------------------------------------------------------------------------------------------------------------------------------------------------------------------------------------------------------------------------------------------------------------------------------------------------------------|
| KEGG_BASE_EXCISION_REPAIR                     | DNA repair    | NEIL2, MPG, SMUG1, XRCC1, POLE4, HMGB1, POLE3, POLD4, MBD4, OGG1, UNG, POLD3, PCNA, NEIL1, POLE2, PARP4, PARP3, PARP2, POLB, APEX1, POLL, POLD1, POLD2, POLE, NEIL3, TDG, APEX2, LIG3, HMGB1P1, NTHL1, HMGB1P40, FEN1, LIG1, MUTYH, PARP1                                                                                                                                                                                                                                                                                                                                                                                                                                                                                                                                                                                                                                                                                                                                                                                                                                                                                                                                                                                                                                                                                                                                                                                                                                                                                                                                                                    |
| REACTOME_DNA_REPAIR                           | DNA repair    | RAD50, CDK7, CCNO, MAD2L2, POLD3, ERCC8, ALKBH2, DDB1, DDB2, ERCC1, ERCC2, ERCC3, ERCC4, ERCC5, ERCC6, FANCA, FANCC, FANCD2, FANCE, FANCB, FANCF, FANCG, ALKBH3, FEN1, SMUG1, XRCC6, ZBTB32, UBE2T, GTF2H1, GTF2H2, GTF2H3, GTF2H4, H2AFX, APEX1, LOC389901, LIG1, LIG3, LIG4, MGMT, MNAT1, MPG, MRE11A, MUTYH, NBN, ATM, NTHL1, OGG1, PCNA, REV1, POLB, POLD1, POLD2, POLE, POLE2, POLH, POLR2A, POLR2B, POLR2C, POLR2D, POLR2E, POLR2F, POLR2G, POLR2H, POLR2I, POLR2J, POLR2K, POLR2L, ATR, FANCL, TDP1, FRKDC, XAB2, FANCM, POLD4, RAD23B, RAD51, RAD52, REV3L, RFC2, RFC3, RFC4, RFC5, RPA1, RPA2, RPA3, RPS27A, LOC648152, LOC651610, LOC651921, LOC652672, LOC652857, GTF2H2B, BRCA1, BRCA2, TCEA1, TDG, TP53BP1, RPS27AP11, UBA52, USP1, XPA, XPC, XRCC1, XRCC4, XRCC5, PALB2, C17orf70, BRIP1, MBD4, CCNH, C19orf40, MDC1                                                                                                                                                                                                                                                                                                                                                                                                                                                                                                                                                                                                                                                                                                                                                                           |
| SANSOM_APC_TARGETS_REQUIRE_MYC                | Proliferation | NRF1, CSDA, GTPBP6, NHP2, MVK, METTL2B, DRG2, QTRT1, DUS3L, WDR34, ADAT1, BCL11A, RRP9, RPS10, HOMER1, RPS13, CITED1, FHOD1, NFS1, GIPC1, VARS, TP53RK, PHGDH, C16orf88, SIVA1, ZMYND19, CDC94, WDR4, KAT2A, MBD3, BUB1B, C4orf43, RNA5EH2C, CAD, ATMIN, QTRT1, BVM, TIMELESS, DDAH1, PABPC4, C7orf96, NEUROG3, SOX4, ZNF236, CENPF, DZHGDH, WDR62, ZFP2, ZNF444, HOKA9, CDC163P, SNHG3, SLC22A2, SRM, OGG1, STOML1, ALKBH2, WRB, HES6, RAD23A, CDC96, TMEM209, SMOY5, WHS01, PPP1R14B, C17orf49, SIKMAR1, MED22, OGFOD1, SETD8, MYC, COX4NB, ATG9B, SEMA3B, BMP7, ZNF213, HAGHL, THOP1, ERCC1, FLYWCH2, MYEF2, RANGRF, RAI14, SLC35B2, GAR1, IFFO2, SRRD, MRPL38, GALNT10, C1NP, TMEM186, WDR48, SHMT2, SYTL1, HIRA, KRTAP21-1, CDK4, DTL, CTBS, TRDN, DHX58, ZSWIM3, C10orf107, SHPRH, FADS2, SNRPF, DDX49, ARHGFE12, PTOV1, NSUN5, SNRPG, AAAS, DEPTOR, RNA5EH2A, CDC42BP4, PTHLH, METTL13, ROR2, EXOSC1, NBEAL2, MUTYH, NME1, GPSM1, SRGAP2, FZD6, AXIN2, TMPO, TSEN2, EXOSC4, RAD54L, LRP8, FAM116B, NFKB2, TP53, SLC03A1, USP20, LANCL2, SLC12A6, POLE, TNFRSF12A, CCDC166, TRIB1, WDR54, RASSF4, VEZT, PPAAN, DPH2, CREBBP, ACER2, ARX, MCM7, RGS12, ZBTB48, PCBP4, TK1, FADS3, DTYMK, TXNRD2, LFN6, GAS8, GNPNTAT1, POLR1A, C9orf140, METTL1, HSPBAP1, FAR5B, TLEO2, TTC27, TGIF2, SNX24, SHMT1, TXNRD3, TMEM180, AQR, EPHB2, DNMT3B, GTSE1, MDN1, PMF1, BOD1L, KIAA1456, RABEP2, ZNF600, NOP56, TRMT61A, FANCA, LMNB2, LHP, OSR2, SOX17, ERCC4, ZBED3, ASCL2, POMT1, BCL11B, FBL, SETD4, MFS3, LDB1, C16orf5, POFUT1, GTPBP3, MUBA1, MAPK7, PRSSA41, SKA1, CCT7, METTL11A, PMM1, BID                |
| DANG_REGULATED_BY_MYC                         | Proliferation | SMN1, TRAF2, SNRPD3, SREBF1, TERC, TOP1, UBE2C, TIMM10, VARS, TIMM23B, TLE4, CLPB, TDFP1, TDP1, SURF6, UNC119, TXNRD1, SRPK1, SNRNP70, ZNF239, EFTUD2, TXN, SLC20A1, SYNGR1, SEPHS2, SRMS, UXT, TXNL4A, STAT5B, SRM, SRSF1, WDR3, SMN1, TK1, ZNF532, UCHL1, SLC7A5, THRA, VDAC1, THOP1, RRP9, SLC25A3, SHMT1, CCNC, SNRPF, UCK2, UAP1, ZNF330, SUMO2, FEZ2, SRSF7, WDR12, SLC25A4, SLC16A1, SLC6A1, TCF3, VRK1, TBL3, TERT, TARBP1, TYMS, SNRPD2, UCN2, SERPINE1, GGH, RUVBL2, YWHAE, HOMER1, VARS1, SLC2A1, TP53                                                                                                                                                                                                                                                                                                                                                                                                                                                                                                                                                                                                                                                                                                                                                                                                                                                                                                                                                                                                                                                                                            |
| ROSTY_CERVICAL_CANCER_PROLIFERATION_CLUSTER   | Proliferation | AURKA, ECT2, HELLS, FOXM1, ESPL1, PAFAH1B3, PLEK2, KIF15, ASF1B, DNMT3B, TMPO, EZH2, C18orf10, BIRC5, COMMD8, MCM4, GINS4, TOP2A, NUSAP1, POLO, DTL, RPA3, RRM2, TTK, RACGAP1, CCK2A, HNI, CDK1, DBF4, CDC20, HMGAI, MKI67, GPD, CDCATL, CENPF, CCNB2, TPX2, CENP, F20B, NETO2, CDC48, MAPK13, TACC3, KPN2A, CCDC99, KIF11, KIF4A, LMNB1, BUB1B, NCAPH, GGH, EIF4EBP1, BRCA1, AKM5, STIL, SAC3D1, BUB1, CHEK1, CELSR3, CDKN2A, PLK1, TRIP13, CENPE, SLMO2, PAQR4, MLF1IP, BID, PRC1, POLA2, ATAD2, CA2, CENPA, NEK2, SGCAP1, APOBEC3B, MCM2, LRP8, CCNE2, RAD51AP1, NDC80, KIF20A, E2F8, CKS2, HSPB11, NCAPG, CENPM, PCNA, CDC6, ACACA, KIAA0101, H2AFX, TK1, TMSB10, ANP32E, OIP5, ZWINT, DHFR, CDCA3, H2AFX, MELK, GINS1, EBP, KIF18B, MRPS15, DLGAP5, KIF23, SLC38A1, HMMA, SMC2, DNA2, SMC4, UBE2S, PBK, MYBL2, CCNB1, GMNN, PTTG1, GTSE1, DS2, EZF1, DTYMK, MCM10, SPAG5, KIF2C, HJURP, ERCC6L, AURKB, CCDC109B, FBXO5, MAD2L1, KIF14, CEP55, UBE2C, ASPM, CTNNB1, HMGB2, DPP3, KIFC1, CHAF1B, SLC25A15, LSM4                                                                                                                                                                                                                                                                                                                                                                                                                                                                                                                                                                                           |
| KEGG_PHOSPHATIDYLOSITOL_SIGNALING_SYSTEM      | Proliferation | PLCB2, CALM2, INPP1, PLCB1, PLCD1, PRKCB, PRKCA, PLCB3, CALM1, PLCB4, DGKZ, INPP5A, DGKE, INPP5B, DGKD, INPP4A, PRKCG, INPP1, DGKH, INPP5D, SYNJ2, PIP4K2B, ITPR3, PLCD3, PIKFYVE, IMPA1, IMPA2, PIP5K1A, PIP5K1B, INPP5J, CDS1, INPP5K, SYNJ1, PLCD4, ITPKA, PIK3R5, ITPKB, ITPK1, CDP1T, ITPR1, ITPR2, DGKO, CDS2, INPP4B, DGKB, DGKG, DGKA, DGKI, PLCE1, CALML5, PIP5K1C, PIK3C2B, PIK3C2G, PIP4K2A, PIK3C2A, PTEN, PIK3R3, PIP4K2C, IPPK, CALML3, PIK3CA, PIK3CB, PIK3CD, PLCG1, PLCG2, PLCZ1, PI4KB, CALM3, INPP5E, PIK3CG, PIK3R1, OCRL, PIK3R2, CALML6, PI4KA                                                                                                                                                                                                                                                                                                                                                                                                                                                                                                                                                                                                                                                                                                                                                                                                                                                                                                                                                                                                                                         |
| ZEMBUTSU_SENSITIVITY_TO_MITOMYCIN             | Proliferation | CPXM1, SHC2, PCDH1, COX6A2, TBC1D7, TRAF2, RND3, ZNF831, MMP3, OTC, PGLYRP1, S100A4, KRCC1, C7orf62, ARHGAP26, TNFRSF14, IL32, AMPD1, TRMT11                                                                                                                                                                                                                                                                                                                                                                                                                                                                                                                                                                                                                                                                                                                                                                                                                                                                                                                                                                                                                                                                                                                                                                                                                                                                                                                                                                                                                                                                 |
| CHIANG_LIVER_CANCER_SUBCLASS_PROLIFERATION_UP | Proliferation | AURKA, CCNE1, DEPDC1B, C4orf7, CD24, SLC16A3, CDG7, SLAMF8, FOXM1, MTRR, ELOVL7, SMC4, LDLRAD3, CDK1, SLC7A7, BUB1B, CTBP2, SLC39A10, GALNT7, TPX2, KIF14, OIP5, PRR11, MCM2, SGOL2, RAD51AP1, BIRC5, CDCATL, BNB1, GPD, CDCA5, CENPF, PTTA43, MAD2L1, TMEM51, PAPLN, PAFAH1B3, FEN1, DDR1, TTF2, SKA1, FBXO5, SLC38A1, WASF1, KIF20A, LRRC1, PRKCD, BACE2, UGG, DLGAP5, KIF2C, SLC1A5, ARHGAP18, SALL2, ANLN, SOX9, ZNF532, NCK2, LEPRELA, FNNL2, B3GNT5, PKM2, CCNB1, MEPIA, LHFP2, MUBA4, H19, KIF4A, MPRCK, ASRGL1, KIF11, TRIP13, MARCH3, DTL, CENPE, NUF2, CSDA, CDKN3, SOX4, CMTM3, RMI2, DSCC1, TTK, CCNA2, KIF18B, FLVCR1, ZWINT, PNL2, PKDC, SHCBP1, HIST1H4C, NCEH1, PAG1, CCNB2, MPM12, ABCC1, PM20D2, ASPM, FAM164A, SEL1L3, MKI67, NEK2, CKAP4, BCAT1, TMED3, PAF, AFF, LAMB1, B4GALT5, EZH2, MAPK13, CHST11, C11orf93, WSB1, NCAPG, S100P, ORC6, TMEM65, HJURP, TNFRSF21, CDCC20, MARCKSL1, SYNJ2, SLC12A3, CKAP2L, PTTG1, DUSP9, HDAC2, PIGAP1, CDCA7, GPD1L, ECT2, FAM118A, FHOD3, BARD1, MDC1, PKB, KIF23, MMD, RACGAP1, HNI, SAS56, NUSAP1, NDC80, SELM, PRC1, HMGB2, UBE2C, SPHK1, ELF4, NTSDC2, CDC6, FUND1, ZNF1-A51, PELI1, CCDC109B, CY8A, ATP1A1, GLIS2, LMNB1, SALL4, CEP55, RFC4, PLBD1, ARID3A, TOP2A, MECOM, TRNP1, FANCI, AURKB, HK2, ETV4, E2F8, MMP9, VEGFB, EIF2B3, HELLS, PDE9A                                                                                                                                                                                                                                                                                            |
| EGUCHI_CELL_CYCLE_RB1_TARGETS                 | Cell cycle    | CDC25C, ECT2, SMC4, BUB1, CCNA2, MCM5, KIF18A, MCM7, CENPE, MCM2, MCM4, NDC80, MCM6, MCM3, HMGB2, FEN1, CDCA8, NEK2, CCNE2, NCAPG, KIF20A, SMC2, KIF11                                                                                                                                                                                                                                                                                                                                                                                                                                                                                                                                                                                                                                                                                                                                                                                                                                                                                                                                                                                                                                                                                                                                                                                                                                                                                                                                                                                                                                                       |
| PID_AURORA_B_PATHWAY                          | Cell cycle    | PPP1CC, KIF23, NCAPH, SGOL1, STMN1, AURKC, MYLK, SMC2, RHOA, BIRC5, KIF2C, NCL, CBX5, CDCA8, SEPT1, VM, DES, KLHL9, RACGAP1, AURKA, INCENP, PSMA3, NSUN2, NCAPD2, RASA1, KLHL13, BUB1, NDC80, SMC4, NCAPG, AURKB, KIF20A, TACC1, PPP2R5D, PEBP1, CENPA, EVI5, CUL3, NPM1                                                                                                                                                                                                                                                                                                                                                                                                                                                                                                                                                                                                                                                                                                                                                                                                                                                                                                                                                                                                                                                                                                                                                                                                                                                                                                                                     |
| WHITFIELD_CELL_CYCLE_G2                       | Cell cycle    | H2AFX, TOP2A, KBTBD2, KIF22, SAP30, CCNA2, TNPO2, GPR126, TRIM69, CDKN2C, NFIC, ANLN, VPS25, DET1, CEP350, GABPB1, MND1, MUC1, CITA, NNMT, LIX1L, BRD8, SKA3, ARMC1, BUB3, STIL, HMGB2, FAM72B, NCAPH, HJURP, ASXL1, CXCL14, DCAF7, CDK1, STA11, SRGAP2P1, NLRP2, HIST3H2A, NR3C1, GAS1, C9orf100, C2orf69, RANGAP1, C5orf49, MAD2L1, FAM83D, MELK, NUCKS1, JGAP3, G2E3, CCDC107, KIF11, FAN1, RGS3, SV2B, NMB, KIFC1, CASP3, CYTH2, MIS18BP1, WSB1, KIAA1524, HLA-DRA, ENTDP5, TUBB, KDM4A, KPN2A, KLF6, KIF5B, UBXN11, FZR1, FAM113A, ZNF587, MGAT2, AURKB, TPFA2A, WDR62, CFLAR, HSPA2, LMNB1, CBX5, KIF20B, SORL1, ARL4A, MALAT1, UBE2C, TMM, PRC1, NDC80, AP3D1, ATL2, NBPF10, MID1, CKAP2, WISP1, KATNA1, SGCD, PSMD11, EMP1, SMC4, BTNL9, TTF2, SUGL2, TUBB4B, TUBD1, TRAP1, TRMT2A, HINT3, NIPBL, HP1BP3, NCOA5, CDC16, CCNF, GAS2L3, HNI, CENPL, FNAR1, ESP1, POLQ, PIF1, HIPK2, FAM110A, ARHGAP19, DHX8, C12orf32, STK17B, C15orf29, CDC25C, BORA, NEIL3, CKAP2L, LOC645739, CDCA3, CDK2, ARHGAP1B, TUBB2A, KIF23, LOC441052, ALKBH1, FANCD2, PKNOX1, RDH11, LTBP5, TUBA4A, CDKN1B, CDCA8, CDCA2, NUSAP1, PPP1R2, HAUS5, TVSN1, UNCSCL, UACA, FADD, CCDC165, C6orf103, HRS12, DNAJB1, KCTD9, RCDD1, NUMA1, TMPO, LBR, VTA1, TUBA1A, RNF141, NCAPD3, CDKL5, TMEM99, ZNHIT2, EB1, CFD, CHEK2, TRIM69, C14orf80, STAT5B, CDC42EP4, CY8R2, TIMP1, TTC38, BCLAF1, MEPCE                                                                                                                                                                                                                                 |
| ZHOU_CELL_CYCLE_GENES_IN_IR_RESPONSE_6HR      | Cell cycle    | PAICS, E2F8, CDT1, MAGOHB, GINS3, CENPK, HAUS5, HMGB3, RTKN2, UHRF1, LBR, RFC4, E2F1, MCM7, DCTPP1, CMB3, TPRKB, GPN3, SMC2, DNAJC9, POC1A, CCNA2, KIF22, FABP5, DEK, PSMC3IP, RPA2, USP1, LMNB1, FBXO5, MCM5, F10, GMNN, CENPA, CHAF1B, KIAA0101, KIF11, RACGAP1, KIFC1, RFC5, FAM64A, TTK, SULF2, TRIP13, MAD2L1, DTL, TOPBP1, C12orf48, KIF20A, NCAPH2, C16orf61, UBE2T, KNTC1, EXO1, WDHD1, RAD51, NUP88, CDCA5, SAP30, NEK2, BRCA1, DLGAP5, FAM54A, NUSAP1, HMGB2, QSER1, CDK2, MYBL2, MCM2, EZH2, GINS2, MCM6, HAUS3, CEP55, RAD54L, DTYMK, DCLRE1A, SEMA3B, RANBP1, H2AFX, FAM198B, TIMELESS, DSN1, SOD3, CDCA8                                                                                                                                                                                                                                                                                                                                                                                                                                                                                                                                                                                                                                                                                                                                                                                                                                                                                                                                                                                       |
| ZHOU_CELL_CYCLE_GENES_IN_IR_RESPONSE_24HR     | Cell cycle    | HAUS3, CLN6, KPN2A, NUP88, CKAP2, PAICS, THOC4, SULF2, TPRKB, TOP2A, FABP5, NEK2, SQRLD, PTTG1, LBR, MCM7, FBLN1, EIF2S1, F10, DCTPP1, SEMA3B, RPA2, LMNB1, CENPM, ASPM, C12orf48, TTK, PTTG3P, PTTG2, FGFR1OP, WIPI1, ANLN, LAMB1, C15orf23, RACGAP1, TDP1, TOPBP1, BORA, MAD2L1, CHAC2, CDC20, GPN3, HMGB2, CENPA, POLD1, H2AFV, DCN, CCNB1, USP1, ODF2, SPAG5, CDCA8, KIF20A, CACYBP, RAD54L, POC1A, NUP107, SOD3, MAGOHB, SP25, CEP55, DEPDC1, COLEC12, CCNB2, UHRF1, C16orf61, UBE2C, KNTC1, DLGAP5, FAM64A, H2AFX, E2F8, RANBP1, EZH2, NUF2, PLEK2, NCAPH2, CCNA2, MXR4S, SPM2A, MCM3, MELK, DNAJC9, MCM8, CDKN3, FBXO5, LRRN4CL, CDK2, CDK1, MCM2, RBBP8, HAUS8, CENPF, KIFC1, QSER1, NASP, TRIP13, IFT20, CSE1L, KIF23, FAM198B, NEIL3, MDC1, HMHR, PCNA, BUB1, HMGB3, NUSAP1, MYBL2, NUP35, GINS3, EXO1, BIRC5, EXOSC8, FAM54A, TIMELESS, RFC5, PRC1, SMC2, KIF22, E2F1, CENPK, HNI, KIF11, DTYMK, LCN, RFC4, UBE2T                                                                                                                                                                                                                                                                                                                                                                                                                                                                                                                                                                                                                                                                                 |
| WHITFIELD_CELL_CYCLE_G2_M                     | Cell cycle    | ZNF521, HMGB3, CDC27, PRR11, TOMM34, RBM8A, RCAN1, MIS18BP1, C9orf140, WSB1, ZMYM1, TGIF1, ATXN1L, CNTR0B, C15orf23, CCDC99, CKS2, IGH1A, HPS4, FOXM1, CDC25B, MKI67, QRICH1, MLLT4, RASGEF1A, LRRC17, HMHR, NEK2, GTSE1, CCDC90B, ERN2, OIT3, RNF126, SS18, NCOA5, NUF2, GAS2L3, SPAG5, C19orf76, BIRC2, GAS6, G2E3, RAD51C, KIF20B, NCAPD2, TLE3, TXNRD1, POC1A, ZFX, TPX2, SGOL2, ORAOV1, HSPA13, CADM1, KIAA0182, TACC3, FRZB, KIF5B, PTP4A1, PRPSAP1, BUB1, DUSP4, CNOT10, DLGAP5, FYN, TXNDC9, C5orf41, THRAP3, USP13, MZT1, SUV420H1, PPP1R10, PKR, DR1, BMP2, CDC20, ID2, ODF2, ANP32B, CFLAR, CENPA, HSPA8, FAM64A, DNAJB1, INADL, CKA2S, MATN2, LMNB1, TNP01, UBE2D3, ITPR1, ZC3HC1, CCNB2, RANGAP1, E2F5, SRF, TRIP13, TSN, ANP32E, KLHDC9, KIF14, ARLBP1, MAPK13, TSC2, PLAG1, MCM4, VCAM1, YWH4, AHI1, SRAO1B, CDKN2D, CLR1, PLK1, SRSF3, BAKALT1, USP16, G0T1, PAK6, CENPF, DZIP3, AURKA, TEF3, DEPDC1, CEP55, PTGER3, CD37, CTNNA1, SHCBP1, CSGALNACT1, DIAPH3, CCNA2, SFFO, PHF15, KLF9, INSM1, TAMEL138, TTK, HSS2T1, CG, RERE, PIK3CD, SRO5A1, CTNND1, ANLN, ATF7IP, NUSAP1, WIG, CCDC88A, INPP5K, CENPE, HMG20B, PCF11, ANKRD40, ME3, NDE1, CKAP2, GLI1, ZNF207, ARHGDB, CD42EP1, SMARCD1, BIRC5, PTFN9, SLC44A2, SETD8, MDC1, SEPHS1, TNFAIP8L1, KIAA0889, CDCA3, ECT2, PRR25, KCTD5, HSP1BP3, AKRIN2, GRK6, CTCF, DNAJA1, NUP98, SEPN1, KIF2C, SMTN, FGA, PWP1, LBR, RCBTB2, DEPDC1B, ASPHD2, CKB1B, VAGL1, RRP1, TUBB4A, HSPA1L, NUP35, SPTBN1, C1orf96, ASXL1, HNI, TMC04, ARHGAP19, HERPUD2, TSKU, SLC17A2, POM121, ADH4, LFN, HCN1, IDO1, RNF141, CNN2, CIT, TSG101, RNPS1, GADD45A |

|                                                               |                 |  |                                                                                                                                                                                                                                                                                                                                                                                                                                                                                                                                                                                                                                                                                                                                                                                                                                                                                                                                                                                                                                                                                                                                                                                                                                                                                                                                                                                                                                                                                                                                                                                                                                                                                                                                                                                                                                                                                                                                                                                                                                                                                                                                                                                                                                                                                                                                                                                                               |
|---------------------------------------------------------------|-----------------|--|---------------------------------------------------------------------------------------------------------------------------------------------------------------------------------------------------------------------------------------------------------------------------------------------------------------------------------------------------------------------------------------------------------------------------------------------------------------------------------------------------------------------------------------------------------------------------------------------------------------------------------------------------------------------------------------------------------------------------------------------------------------------------------------------------------------------------------------------------------------------------------------------------------------------------------------------------------------------------------------------------------------------------------------------------------------------------------------------------------------------------------------------------------------------------------------------------------------------------------------------------------------------------------------------------------------------------------------------------------------------------------------------------------------------------------------------------------------------------------------------------------------------------------------------------------------------------------------------------------------------------------------------------------------------------------------------------------------------------------------------------------------------------------------------------------------------------------------------------------------------------------------------------------------------------------------------------------------------------------------------------------------------------------------------------------------------------------------------------------------------------------------------------------------------------------------------------------------------------------------------------------------------------------------------------------------------------------------------------------------------------------------------------------------|
|                                                               |                 |  | KIF20A, ACTR1A, AKAP9, CDK2, CDK4, CDK6, PSDM14, CDK7, CDKN1A, CDKN1B, STAG1, CDKN2A, CDKN2B, CDKN2C, CDKN2D, TUBB4B, TUBB4B, ANAPC10, NDC80, TUBGCP3, DCTN2, CENPA, CENPC1, CENPD, POLD3, NUDC, PLK4, STAG2, SDCCAG8, TUBGCP2, DBF4, KIF2C, CNTRL, UBE2C, FGFR1OP, ZWINT, CEP250, PMF1, DCTN3, TUBGCP5, CKS1B, NEDD1, LIN54, PSM8A, CSNK1D, CSNK1E, SPC24, SGOL2, SGOL1, DCTN1, DHFR, DNAD2, DYNC1H1, DYNC1L2, DYRK1A, E2F1, E2F2, E2F3, E2F4, E2F5, TUBB, SKA1, FEN1, CEP164, MAPK1, NINL, A211, PSME4, LOC41488, MYBL2, MYC, NEK2, ORC3, POLA2, CDC26, CENPI, AHCTF1, NSL1, FBXO5, TUBG2, PPP2R3B, LIN9, ANAPC2, RPA4, ANAPC4, HDAC1, BIRC5, HSP90AA1, SKA2, NUP3, INCENP, APITD1, KIF2A, LIG1, CENPP, MAD2L1, MAX, MCM2, MCM3, MCM4, MCM5, MCM6, MCM7, MNAT1, LOC440917, LOC441488, MYBL2, MYC, NEK2, NUMA1, ORC1, ORC2, ORC4, ORC5, PAFAH1B1, GMNN, PCM1, PCNA, PCNT, ANAPC5, ANAPC7, ANAPC11, GINS2, PLK1, POLA1, POLD1, POLD2, POLE, POLE2, ERCC6L, CDC39, PPP10C, ZWILCH, CEP192, HAUS2, CDC25A, PPP2CA, PPP2CB, CENPO, PPP2R1A, PPP2R1B, PPP2R2A, PPP2R5A, PPP2R5B, PPP2R5C, PPP2R5D, PPP2R5E, MCM10, PRIM1, PRIM2, PRKACA, CEP72, NUP133, CDKGRAP2, PRKAR2B, CENPJ, CENPN, RCC3, LIN37, PSMA1, PSMA2, PSMA3, PSMA4, PSMA5, PSMA6, PSMA7, PSMB1, PSMB2, PSMB3, PSMB4, PSMB5, PSMB6, PSMB7, PSMB8, PSMB9, PSMB10, PSMB11, PSMB2, PSMB3, PSMB4, PSMB5, PSMB6, PSMB7, PSMB8, PSMB9, PSMB10, PSMB11, PSMD1, PSMD2, PSMD3, PSME1, PSME2, SPC25, TAOK1, POLD4, RAD21, RANBP2, RANGAP1, RB1, RBBP4, RBL1, RBL2, CCND1, RFC2, RFC3, RFC4, RFC5, RPA1, RPA2, RPA3, RPS27, RPS27A, RRM2, CLIP1, SEC13, CENPK, RBBP4P1, DHFRP1, LOC645084, ANAPC1, GORASP1, TUBBP2, LOC647654, CENPH, LOC649620, SKP1, SKP2, LOC650621, LOC651763, LOC652826, AURKA, BUB1, BUB1B, TDFP1, TK2, TUBA4A, TUBG1, RPS27AP11, SKAL2, TYMS, CDC26P1, LOC729864, LOC730418, LOC730594, UBA52, UBE2D1, UBE2E1, WEE1, XPO1, YWHAE, YWHAG, ALMS1, TUBA11, MS12, CENPM, NUP37, CENPO, MLF1IP, NUP85, CEP76, DSN1, CENPT, CEP290, CEP63, CEP70, B9D2, NDEL1, CDT1, SEH1, KIF18A, SMC1A, CDOC7, CDC45, NUF2, MAD1L1, GINS4, MCM8, CUL1, KIF2B, OFD1, TUBGCP6, CDC14A, SSNA1, DYNLL1, CDC23, CDC16, CCNA2, CCNA1, CCNB1, CCND2, BTRC, CCND3, CCNE1, CCNH, PKMYT1, SMC3, CCNB2, CCNE2, CENPL, LIN52, ZW10, BUB3, AURKB, PTTG1, PSMF1, KIF23, CEP41, CEP135, CEP57, KNTC1, CKAP5, CDK1, GINS1, PSMD6, CDC6, CDC20, CDC25A, CDC25B, CDC25C, CDC27 |
| REACTOME_CELL_CYCLE_MITOTIC                                   | Cell cycle      |  |                                                                                                                                                                                                                                                                                                                                                                                                                                                                                                                                                                                                                                                                                                                                                                                                                                                                                                                                                                                                                                                                                                                                                                                                                                                                                                                                                                                                                                                                                                                                                                                                                                                                                                                                                                                                                                                                                                                                                                                                                                                                                                                                                                                                                                                                                                                                                                                                               |
| WHITFIELD_CELL_CYCLE_LITERATURE                               | Cell cycle      |  | CDKN3, RACGAP1, E2F1, PCNA, BIRC5, CCNE2, CDC25C, PSRC1, MCM2, CENPA, MCM6, CDKN1A, CCNB1, RRM2, CCNB2, BRCA2, KIF20A, CDC20, AURKA, CDC45, NASP, CCNG2, CDK1, TYMS, CDKN2D, BRCA1, TOP2A, NPAT, E2F5, CKS2, BUB1, CCNE1, BUB1B, CDC6, CCNF, SLBP, MSH2, CDKN2C, CCNA2, RRM1, CDC25A, PLK1, DHFR, CENPF                                                                                                                                                                                                                                                                                                                                                                                                                                                                                                                                                                                                                                                                                                                                                                                                                                                                                                                                                                                                                                                                                                                                                                                                                                                                                                                                                                                                                                                                                                                                                                                                                                                                                                                                                                                                                                                                                                                                                                                                                                                                                                       |
| PID_AURORA_A_PATHWAY                                          | Cell cycle      |  | GSK3B, GIT1, ARHGFE7, CKAP5, TDRD7, BRCA1, BIRC5, RAN, AURKB, NDEL1, PAK1, AKT1, TPX2, DLGAP5, TACC1, PPP2R5D, OAZ1, TACC3, PRKACA, NFKBIA, GADD45A, CDC25B, ZR1, AURKA, CENPA, RASA1, MDM2, CPEB1, JUB, TP53, AURKAIP1                                                                                                                                                                                                                                                                                                                                                                                                                                                                                                                                                                                                                                                                                                                                                                                                                                                                                                                                                                                                                                                                                                                                                                                                                                                                                                                                                                                                                                                                                                                                                                                                                                                                                                                                                                                                                                                                                                                                                                                                                                                                                                                                                                                       |
| BROCKE_APOPTOSIS_REVERSED_BY_IL6                              | Apoptosis       |  | SOX2, STAT3, SH2D2A, HNRNP1, STAT1, SBNO2, ANAPC10, WIPI1, DUSP3, HBEGF, RCN2, MCL1, RB1, LITAF, CADPS, PTP4A3, RALA, JUNB, DPM1, MT1X, RNF13, GADD45A, FLOT1, ZFP36, IRF4, IL6ST, SLC2A3, ID3, ST3GAL6, IER2, GATM, DUSP5, SGK1, MUC1, HSPA13, PNO1, EPB412, MAP3K8, CDB8, SLA, DAPK1, CD44, MAP1B, ACP, PRDM1, MYLK, LRMP, TXNDC9, MX1, FOXO3, LTBP1, PIM1, TNFSF10, AMPD1, PHTF2, HSPA1A, SREK1P1, MAPKAPK2, PIM2, ICAAM1, SPP1, ID1, EEF1E1, NAMPT, POLR3F, POU2AF1, CEBPB, DYRK3, CHST15, DNAJ2, ARFGAP3, BCL6, PTPRG, GRB2, MSO1, IRF9, ZBTB11, ELL2, SRPK2, TGIF1, RGS16, PDGFRA, LDLR, GADD45B, PLSCR1, OAS1, C10orf10, BHLHE40, IFNGR1, AP1S2, POU2F2, TW1, NMI, CCNC, NCBP2, SOCS1, ZNF101, HLLA1, SOCS3, DNAJB9, HCK, CCL2, PLEKHB2, PTP4A1, PTPN11, GNA13, SMC16A, HEG1, KIAA0125, MARCKS, MT1H, ATP2B4, TMF1, EVI2B, TMED7, FAM3C, VWA5A, EVI2A, CDK17, GAS6, DOHH, TPMA, PAN2, IRF1, RAD1, CXCR4, CAV2, SF1, SKI1, ZFP36L2, RHOBTB3, LPCAT4, EIF4E, CD180, MAFF, BCL2L11, ADIPOR2, JUN, STK17B, RAGEF4, BCL3, EIF5, TMEM184B                                                                                                                                                                                                                                                                                                                                                                                                                                                                                                                                                                                                                                                                                                                                                                                                                                                                                                                                                                                                                                                                                                                                                                                                                                                                                                                                                                    |
| CONCANNON_APOPTOSIS_BY_EPOXOMICIN_UP                          | Apoptosis       |  | EIF5, GDF15, RHBDD3, LRIG1, DNAJB6, ALDH1A2, PLK2, PLAT, SLC7A5, IL15, C18orf25, DUSP1, ZFP36, ORC3, IL6R, ABHD3, THBS4, TGFB2, GTF2A1, CAP2, MICB, FOS, DUSP3, COL16A1, CLTB, PCSK1, GLS, KLHL21, ZFR, SLC7A1, SMG1, ATF3, TTC39A, ARHGFE2, LYXN, CASP7, PHLD42, SSX1, SPP1, KIAA0284, HEG1, SLC16A3, CREM, DHRS3, POLR3C, SLC38A6, PRSS12, SYT2, YKT6, ACHE, PDC3, SNT2, NEAT1, SPX2, GOSR2, LMNA, TMEM159, LMO2, HMOX1, CAMK2G, LAMP3, SERPINH1, PSMA5, C6orf145, STK17A, GEM, SPATA2, HSPA1B, DGKE, DNAJC2, TNPO2, MXD1, SLC3A2, PSMD12, NACC2, SSX3, MAGEB1, ZYX, SAT1, CTH, MAP2, ANXA2, CAPN7, GLRX3, PPP1R15A, SEL1L3, NQO1, DUSP4, TUBA4A, CYP4F2, SERPINC1, DAP3, PSMD1, RRD, MIR22HG, ELL2, MDM2, PCYT1A, TOP3B, SLC03A1, UBF1, AGTPBP1, SMOX, SERPINE1, PSMD11, F2RL1, TMF1, JUN, KCTD20, LIN37, ABCG1, STX16, CREBB, ATP2B4, TSPAN9, MAFF, P4HA2, EPCAM, NQO2, TAF13, AKAP6, NSF1C, DNAJB1, SNRK, CYB5R1, SERPINB8, AQP3, GCLM, NTS, CDKN1A, ABLM3, DTNA, SKIL, RAB36, RIT1, ME1, TAC1, BLVRB, CHM, DOK1, KIAA0319, WWIT1, IFRD1, WARS, MAP1A, FAS, GSR, MSX2, HSPA4, HSPA6, HSPB1, CDK11A, DYNCH11, BSK2, ACADVL, CDR1, EPB41, DDIT3, CD44, CALCA, RAB21, MEST, BCL2L11, CEBPB, ITGA7, ADRM1, KLF6, FLNC, HSPA9, PAI2D, HSPA4L, DNAJB4, PRKAZ, NABP2L2, SLC12A4, GPX3, TNFSF9, DNAJB2, SLC7A11, KIAA0930, PRDM2, TNKS, MAPK10, BCC3, PHTF1, ZNF10, TOM1, NUCB1, SQSTM1, HSPH1, BAK1, PDLIM3, LGALS8, HSPA1A, TSPYL2, GADD45G, AKR1C3, CEBG, F1A1, IDE, CLU, PTPRN, UBE2H, ZNF185, PSMD13, MAP1B, JMJD6, MAP1LC3B, TTC1, PHKG2, GADD45A, PLA2G16, TNFRSF10B, PTP1, ZRSR2, IL1L, ACT2, ICAM2, ZRSR1, CCGP1, FILIP1L, GLA, UPP1, RRN3, INPP5D, UBR4, C11orf80, KITLG, MBOAT7, UFD1L, PCYT1B, KIF1B, DYNC1H1, PGF, SUSD5, MAP3K14, CCNT2, GABARAPL1                                                                                                                                                                                                                                                                                                                                                                                                                                                                                                                                                                                                                                                 |
| GARGALOVIC_RESPONSE_TO_OXIDIZED_PHOSPHOLIPI_DS_GREY_UP        | Cellular stress |  | KIAA1522, EMP1, HERPUD2, RORA, SOS1, NAV3, DUSP5, ADAMTS1, LBH, ARRD4, ZNF323, TFEC, CCDC68, FNIP1, IRAK2, ADAMTS9, TRIM16, C5orf41                                                                                                                                                                                                                                                                                                                                                                                                                                                                                                                                                                                                                                                                                                                                                                                                                                                                                                                                                                                                                                                                                                                                                                                                                                                                                                                                                                                                                                                                                                                                                                                                                                                                                                                                                                                                                                                                                                                                                                                                                                                                                                                                                                                                                                                                           |
| GARGALOVIC_RESPONSE_TO_OXIDIZED_PHOSPHOLIPI_DS_BLACK_UP       | Cellular stress |  | PLAGL1, AKIRIN2, CLK1, TFEC, ZNF44, CD55, SQLE, TRIB3, SPRY4, CCDC93, GCH1, EIF1, SNX16, OSGIN2, MOB2, ATP11B, ERRF1, F2RL2, RGM8, PRNP, SRC, LATS2, ZNF295, CDKN1A, DUSP14, ZNF654, CCDC82, NFE2L2, UBB, ETV5, LOC280423, KLF2, ABHD4, CDC42EP2, RHPN2                                                                                                                                                                                                                                                                                                                                                                                                                                                                                                                                                                                                                                                                                                                                                                                                                                                                                                                                                                                                                                                                                                                                                                                                                                                                                                                                                                                                                                                                                                                                                                                                                                                                                                                                                                                                                                                                                                                                                                                                                                                                                                                                                       |
| GARGALOVIC_RESPONSE_TO_OXIDIZED_PHOSPHOLIPI_DS_LIGHTYELLOW_UP | Cellular stress |  | CSGALNACT2, GNA13, ZDHHC18, PNPLA8, RBBP6, UGDH, ABHD3, IER5, USP12, PIM1, SIRT1                                                                                                                                                                                                                                                                                                                                                                                                                                                                                                                                                                                                                                                                                                                                                                                                                                                                                                                                                                                                                                                                                                                                                                                                                                                                                                                                                                                                                                                                                                                                                                                                                                                                                                                                                                                                                                                                                                                                                                                                                                                                                                                                                                                                                                                                                                                              |
| GARGALOVIC_RESPONSE_TO_OXIDIZED_PHOSPHOLIPI_DS_BLUE_UP        | Cellular stress |  | INHBA, FRS2, N4BP2L2, SOS1, TRIB1, DEDD2, WDR20, TNFSF9, IL8, ZC3H12C, ZNF264, CPEB4, KITLG, CXCL3, ZNRF3, PCYT1A, KLHL28, RHEBL1, KIF1B, PPP3C, SPIR1, STIP1, MIR22HG, HSPH1, LOC100133660, DNAJB1, SAV1, SESN2, SAMSN1, RELB, PHF1, SERTAD1, AKIRIN2, CWC25, HSPB8, LOC92659, ATF3, NFATC2, VRDC, SMOR8, C16orf72, RBBP6, CASP3, KLF5, VCP1P1, RNF24, BRF2, HERPUD1, JUHD, C20orf11, RVBP, DNAJB9, PMAIP1, MXD1, MAFK, IFRD1, CBL1, ZNF222, CREM, MTHFD2L, DDIT3, FAM100B, TMEM57, ZNF468, AGPAT9, EIF1, AHSA1, ANKRD57, C10orf88, SLC3A2, HBEGF, MAFK, C16orf52, KBTBD8, JMJD6, ZNF473, RGM8, E2F6, RCAN1, CNST, BANP, LOC100302650, C9orf150, DNAJA4, RORA, RRP7A, JHDM1D, EID3, RELN, RTCD1, NFIL3, KCTD5, FGF1OP2, RBM33, SRXN1, SLC19A2, DNAJA1, EIF5, C10orf84, TMEM217, HSPA1A, AIFM2, KIF21A, ZNF394, PLAUR, PNPLA8, CHORDC1, SMURF1, ESM1, VPS37A, ETV5, F3, ZNF295, DNAJB6, C6orf145, STK11, ZBTB43, CCNG2, HSPA4L, FOSL1, GNA13, PCF11, C2orf67, TSC22D3, HSPA6, KLHL21, BACH1, LOC100505728, AMMECR1L, RSL1D1, GLA, CREBBP, EIF2C2, ZFAND2A, PNP, BAG3                                                                                                                                                                                                                                                                                                                                                                                                                                                                                                                                                                                                                                                                                                                                                                                                                                                                                                                                                                                                                                                                                                                                                                                                                                                                                                                                          |
| KAN_RESPONSE_TO_ARSENIC_TRIOXIDE                              | Cellular stress |  | MT1X, EIF4G1, VCAN, DKK1, IGF2BP3, SOX2, AKR1C2, ARHGAP6, HSPA6, DPYSL3, ID2B, MGP, IL11, IL7R, FAM64A, ENO2, SCD, MT1E, SPC25, DDIT3, PTN, FABP7, KIF20A, JAG1, RGS4, PSAT1, MAP1LC3B, SCG2, TOP2A, IL8, IGFBP5, GABARAPL1, GSTM3, LMNB1, NDRG1, CLEC2B, NUPR1, SERPINE1, SLC7A11, MYBL1, PTPRO, ARL4C, GRN, BOP1, TRIB3, MT1H, STC2, PTHLH, AK4, FAM162A, MT1F, ADM, MT2A, GDF15, AKR1C1, HEY1, TRIM16, BNIP3L, CBS, DLGAP5, ATF3, SLC30A1, JUN, PIR, DIRAS3, MCM7, C6orf15, TSC22D3, VAT1, ATP9VOE1, AKR1C3, THBS1, GPM6B, PHLD1A, MYCNOS, SEL1L3, CRYAB, AKR1B10, CAV2, CCGP1, DCBLD2, GFPT2, DDIT4, PDGFRA, GLRX, FBXO5, CTH, EFN2, WIPI1, ID2, SLC12A1, ASNS, ANKRD1, SACS, PHGDH, LDLR, TMEM158, CXCL14, STC1, LGALS8, FABP4, PGK1, PODXL, RIT1, MT1P2, INSIG1, PLK2, KLF12, ARHGAP29, PPP1R15A, GPR65, ZNF512B, RRM2, PTPRZ1, FEZF2, SOCS2, HMOX1, KCTD12, NES, NOX1, NDP, GPNMB, MT1G                                                                                                                                                                                                                                                                                                                                                                                                                                                                                                                                                                                                                                                                                                                                                                                                                                                                                                                                                                                                                                                                                                                                                                                                                                                                                                                                                                                                                                                                                                                |
| WEIGEL_OXIDATIVE_STRESS_BY_TBH_AND_H2O2                       | Cellular stress |  | RPA1, ITGB5, CAPN2, CDK10, ACTB, ITGB4, SLC7A5, TCEA1, ZYX, DYNLL1, PPP1R8, TP53, SF1, TTP1, CTNNA1, SPINT2, VCAM1, HDAC1, FMO1, CDKN2B, RPL13A, RB1, ITGAL, TUBA1B, SRF, BAK1, HLA-C, CDH11, ERVW-1, CDC25C, QSOX1, BMP4, MMP11, RNH1, HGFAC, HSPA13                                                                                                                                                                                                                                                                                                                                                                                                                                                                                                                                                                                                                                                                                                                                                                                                                                                                                                                                                                                                                                                                                                                                                                                                                                                                                                                                                                                                                                                                                                                                                                                                                                                                                                                                                                                                                                                                                                                                                                                                                                                                                                                                                         |
| GARGALOVIC_RESPONSE_TO_OXIDIZED_PHOSPHOLIPI_DS_TURQUOISE_UP   | Cellular stress |  | ARHGAP5, CCNG2, FAM126B, JUN, DUSP1, LOC344887, MGC11082, CCDC117, GABARAPL1, TNFSF18, KLF6, PRNP, NCOA3, NAB2, RIT1, SLC4A7, CCDC82, SLC7A11, FOSL2, AKAP12, ANKRD12, RRAGC, AHR, PTP4A1, ARRD3, ZNF627, PTGR1, CDC42EP2, C15orf39, RICTOR, EGR1, ZBTB34, MYC, CLIC2, SLC25A25, RORA, GCLM, SQSTM1, EIF2C2, DIDO1, ACVR1, SAMD8, TNPO1, ZNF264, MERTK, TIPARP, SMG1, NRG1, CNKSR3, C5orf41, EMP1, GPCPD1, PIM3, DUSP3, KLF10, MAP1B, AFF4, CLDN1D1, PANK3, HIPK3, MYCT1, SPIRE1, CLDN15, SPOPL, CFLAR, ZNF697, PGF, HS6ST1, PVRL3, SPRY2, C16orf102, CLIP2, GDF15, SGK1, LINC00304, ZCHCH2, IPMK, ZFP36, NIPA1                                                                                                                                                                                                                                                                                                                                                                                                                                                                                                                                                                                                                                                                                                                                                                                                                                                                                                                                                                                                                                                                                                                                                                                                                                                                                                                                                                                                                                                                                                                                                                                                                                                                                                                                                                                               |
| GARGALOVIC_RESPONSE_TO_OXIDIZED_PHOSPHOLIPI_DS_YELLOW_UP      | Cellular stress |  | C5orf30, C16orf12, KLF4, LCOR, NUP153, PPP3R1, C16orf72, OSGIN1, HMOX1, GK, TNPO1, KITLG, UNKL, JHDM1D, LDLR, PHLP2, TULP3, ENTDPD7, NPC1, GCLC, ATXN7, C10orf88, CHIC2, CNST, NAV3, C3orf58, RAB8B, JOSD1, GCLM, SGM52, XPO1, SLC7A1                                                                                                                                                                                                                                                                                                                                                                                                                                                                                                                                                                                                                                                                                                                                                                                                                                                                                                                                                                                                                                                                                                                                                                                                                                                                                                                                                                                                                                                                                                                                                                                                                                                                                                                                                                                                                                                                                                                                                                                                                                                                                                                                                                         |

**Supplementary Table 8.** Statistical analysis for LDA shown on Supplementary Fig. S14B (up) and 5E (bottom) using ELDA software.

| Group 1  | Group 2           | Chi-sq | DF | Pr (> Chi-sq) |
|----------|-------------------|--------|----|---------------|
| IgG      | Anti-MDK          | 3.19   | 1  | 0.0742        |
| IgG      | AZD7762           | 4.2    | 1  | 0.0403        |
| IgG      | Anti-MDK/ AZD7762 | 27.6   | 1  | 0.000000149   |
| Anti-MDK | AZD7762           | 0.0499 | 1  | 0.823         |
| Anti-MDK | Anti-MDK/ AZD7762 | 12.1   | 1  | 0.000492      |
| AZD7762  | Anti-MDK/ AZD7762 | 11.2   | 1  | 0.0008        |

| Group 1  | Group 2            | Chi-sq | DF | Pr (> Chi-sq) |
|----------|--------------------|--------|----|---------------|
| IgG      | Anti-MDK           | 3.19   | 1  | 0.0742        |
| IgG      | CHIR-124           | 24.3   | 1  | 8.41E-07      |
| IgG      | Anti-MDK/ CHIR-124 | 72.4   | 1  | 1.79E-17      |
| Anti-MDK | CHIR-124           | 9.86   | 1  | 0.00169       |
| Anti-MDK | Anti-MDK/ CHIR-124 | 47.5   | 1  | 5.50E-12      |
| CHIR-124 | Anti-MDK/ CHIR-124 | 16.9   | 1  | 3.88E-05      |
